# Supplementary material for: Hydroxymethylation of quinolines via iron promoted oxidative C–H functionalization: synthesis of arsindoline-A and its derivatives
Source: Royal Society of Chemistry journal article supplement (doi:10.1039/d0ob02212h), 2020-12-10

## Supporting Information

### Hydroxymethylation of Quinolines *via* Iron Promoted Oxidative C-H Functionalization: Synthesis of Arsindoline-A and its Derivatives

Bangarigalla Shantharjun,<sup>a,b</sup> Damera Vani,<sup>a,b</sup> Ramanjaneyulu Unnava,<sup>a</sup> Mummadi  
Sandeep<sup>a,b</sup> and Kallu Rajender Reddy<sup>a,b\*</sup>

<sup>a</sup> Catalysis and Fine Chemicals Division, CSIR– Indian Institute of Chemical Technology, Tarnaka,  
Hyderabad – 500007, India.

Fax: (+ 91)-040-2716-0921; e-mail: [rajender@iict.res.in](mailto:rajender@iict.res.in) or [rajenderkallu@gmail.com](mailto:rajenderkallu@gmail.com)

<http://www.iictindia.org/staffprofiles/staffprofile.aspx?qry=1590>

<sup>b</sup> Academy of Scientific and Innovative Research (AcSIR), Ghaziabad-201002, U.P, India.

#### Table of Contents

|                                                                                                 |       |
|-------------------------------------------------------------------------------------------------|-------|
| 1. <sup>1</sup> H and <sup>13</sup> C NMR Spectra for Compounds ( <b>3a</b> – <b>3p</b> ) ..... | 2-26  |
| 2. <sup>1</sup> H and <sup>13</sup> C NMR Spectra for Compounds ( <b>4a</b> – <b>4j</b> ) ..... | 27-38 |
| 3. <sup>1</sup> H and <sup>13</sup> C NMR Spectra for Compounds ( <b>5a</b> – <b>5e</b> ) ..... | 39-42 |
| 4. <sup>1</sup> H and <sup>13</sup> C NMR Spectra for Compounds ( <b>7a</b> – <b>7c</b> ) ..... | 43-45 |

# $^1\text{H}$ and $^{13}\text{C}$ spectra for compound 3a:

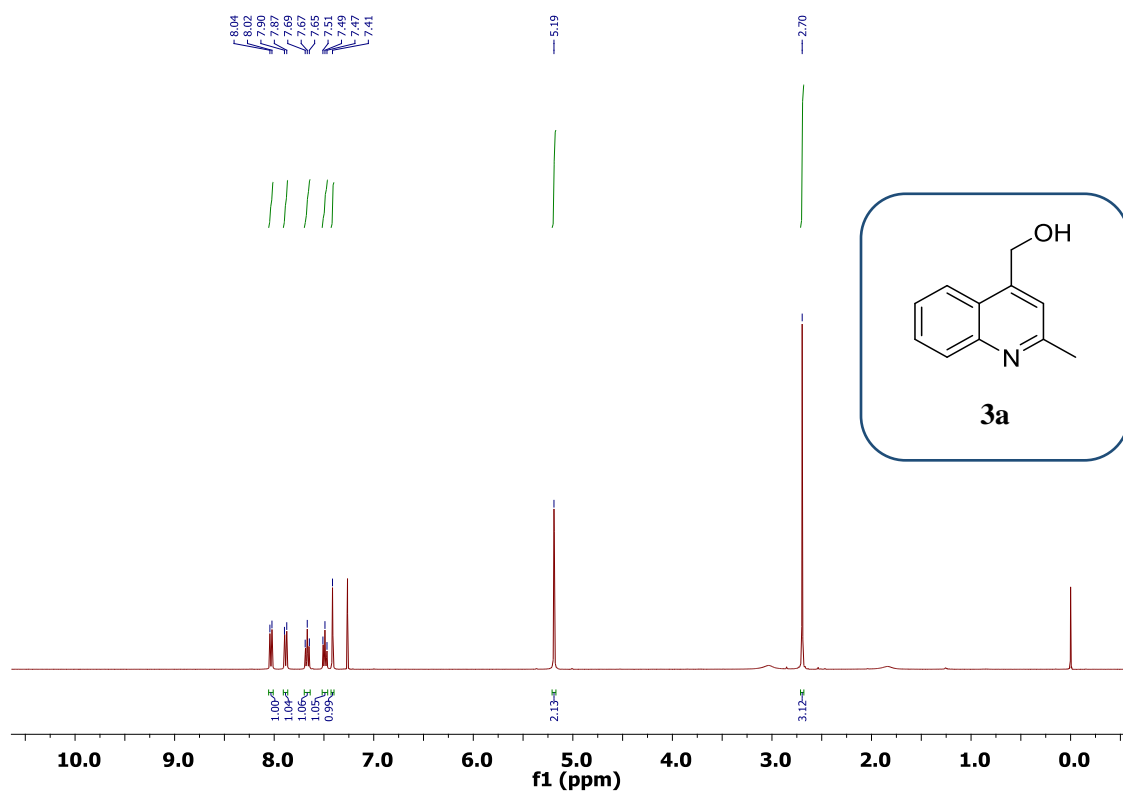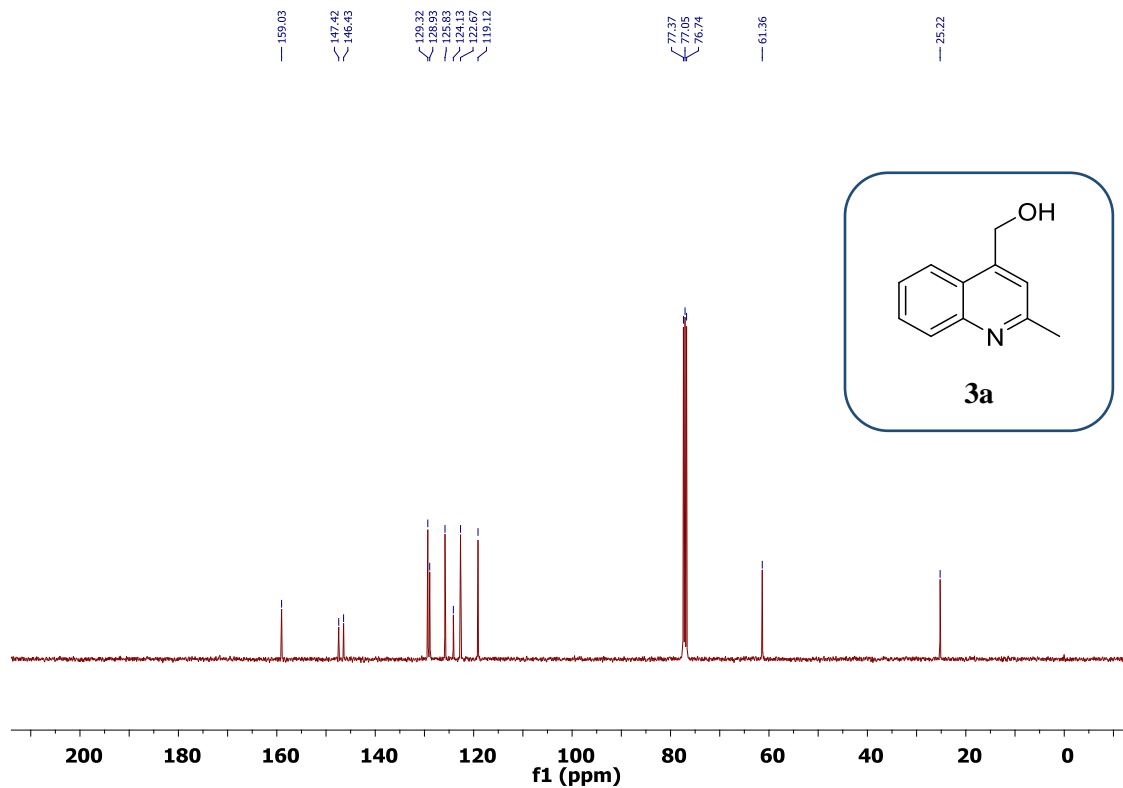

# $^1\text{H}$ and $^{13}\text{C}$ spectra for compound **3b**:

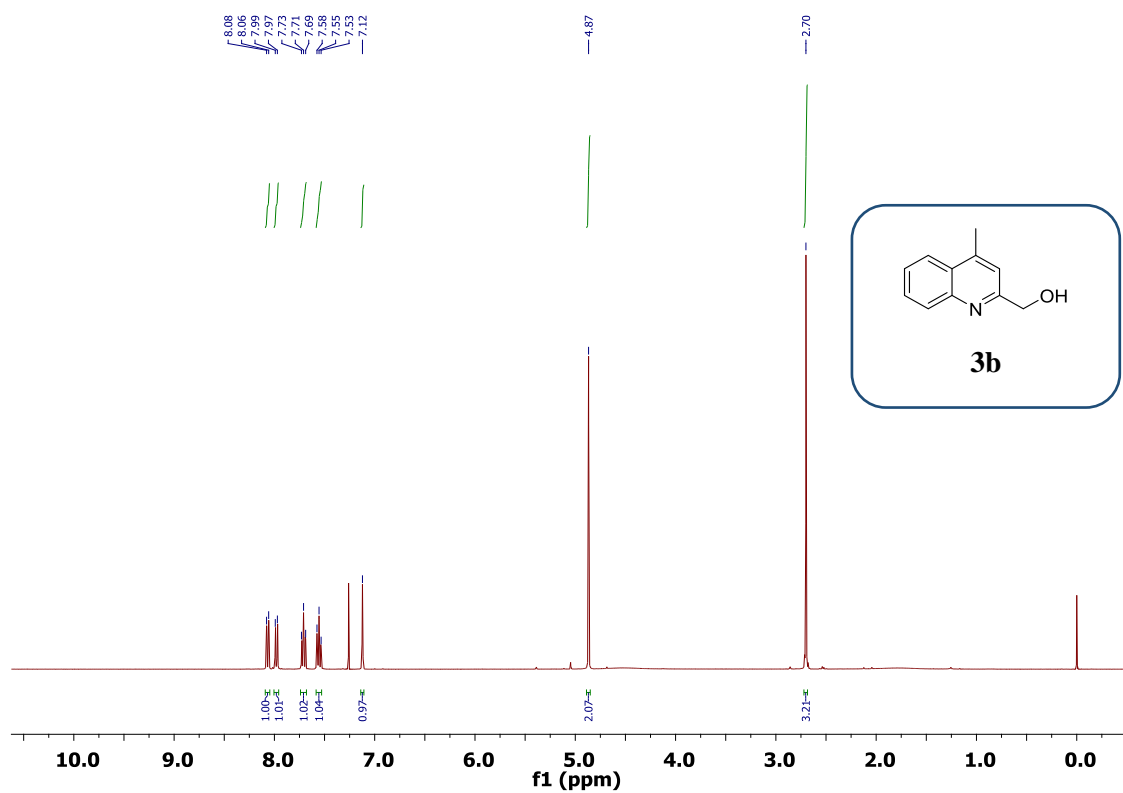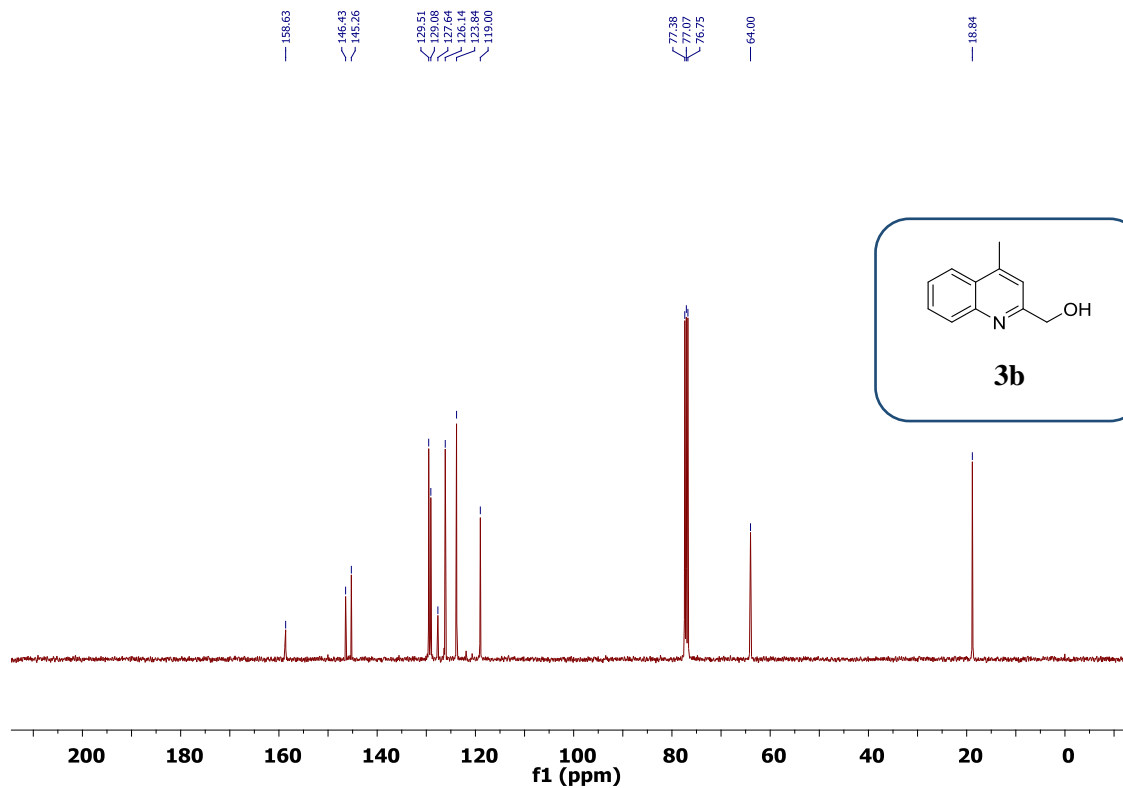

# $^1\text{H}$ and $^{13}\text{C}$ spectra for compound 3c:

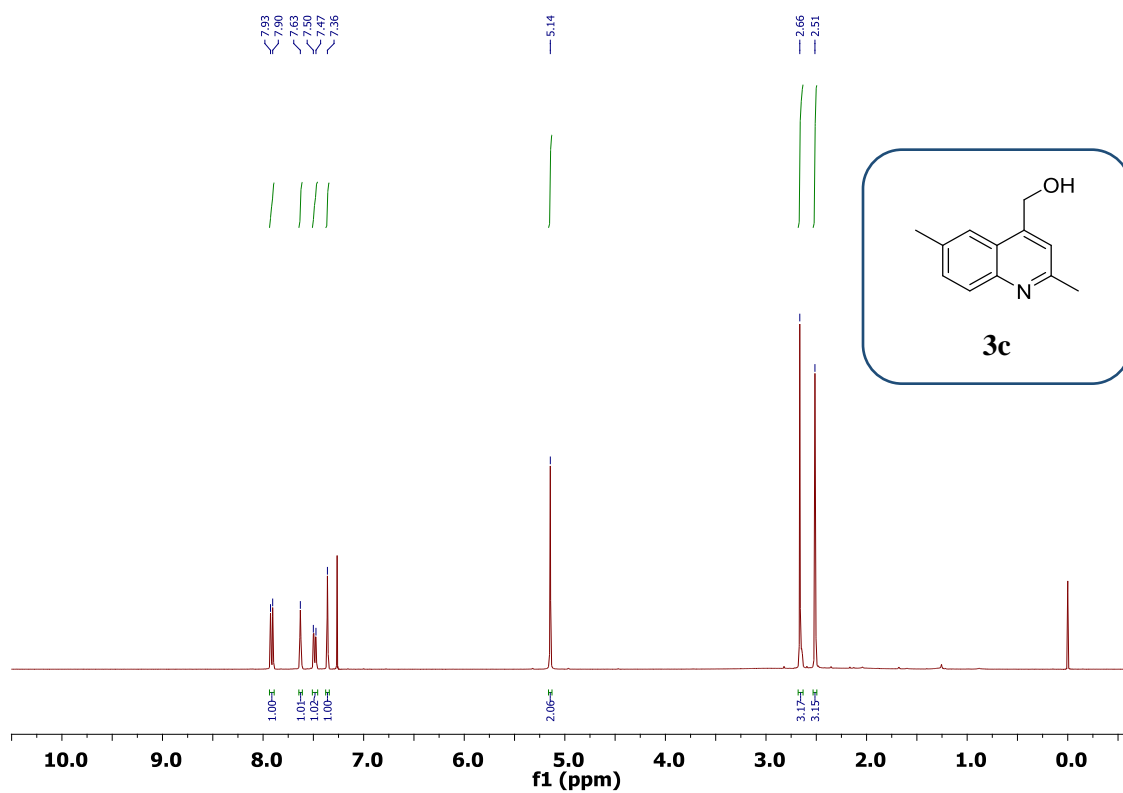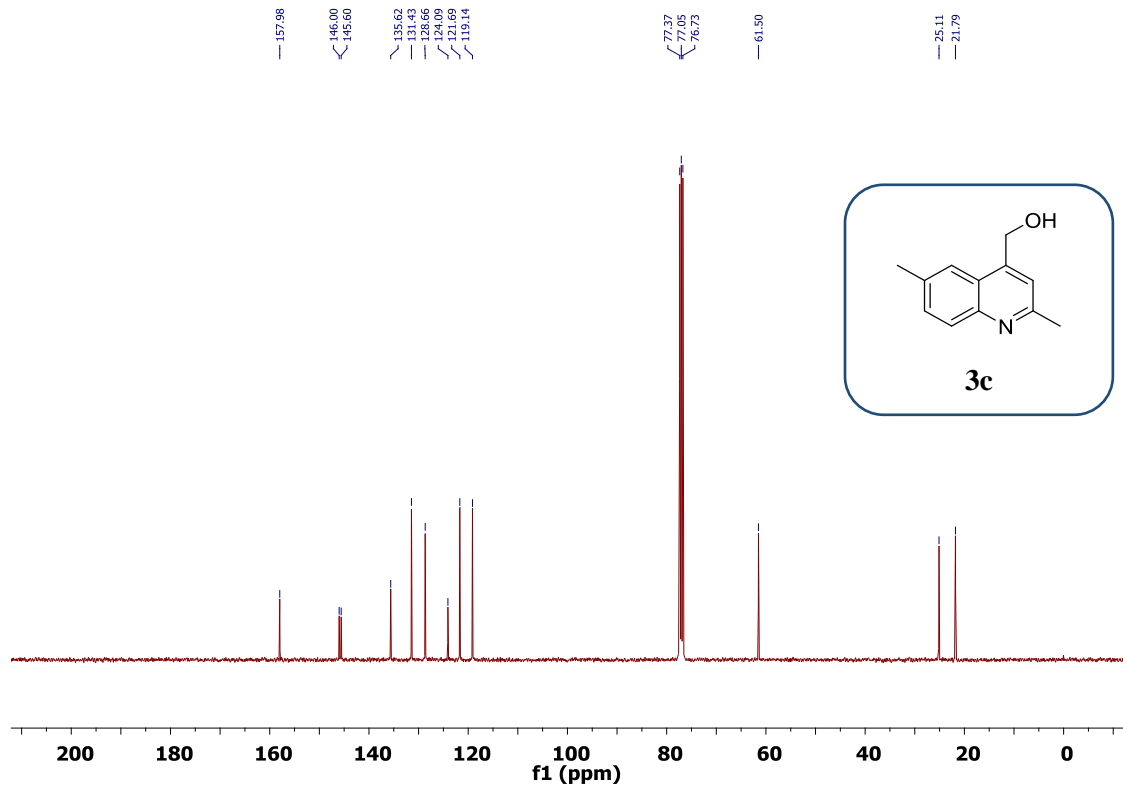

# $^1\text{H}$ and $^{13}\text{C}$ spectra for compound 3d:

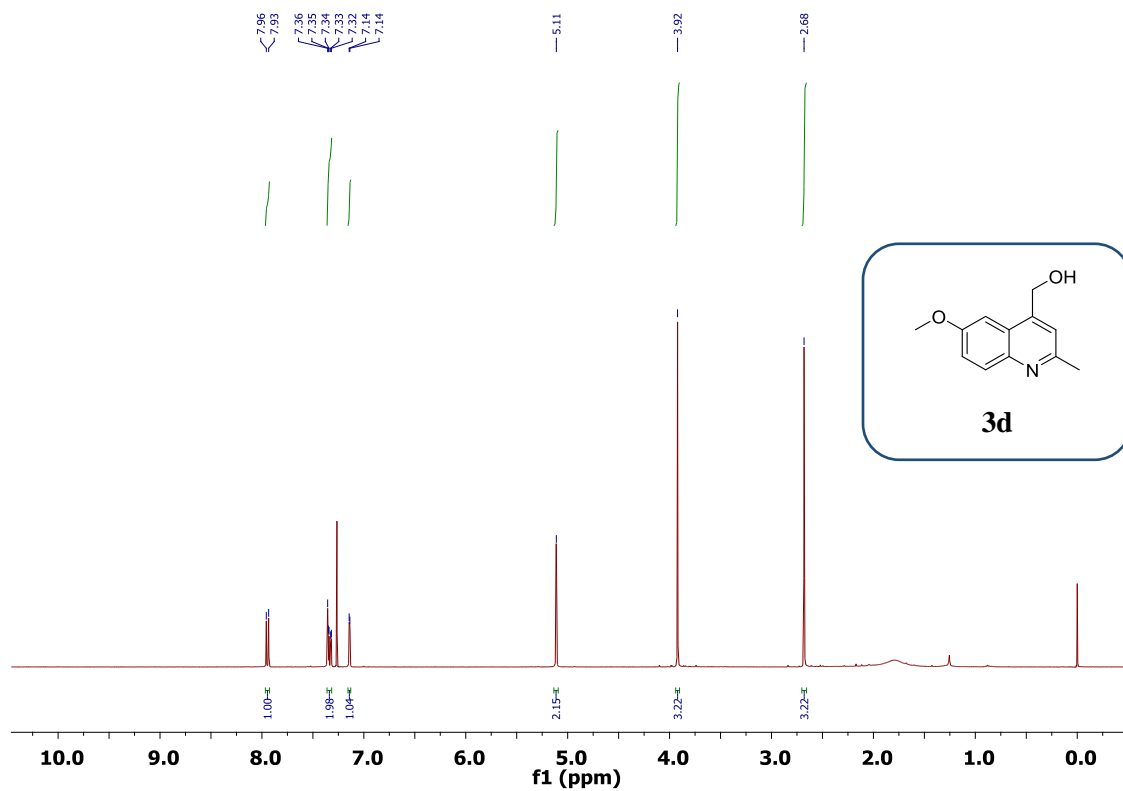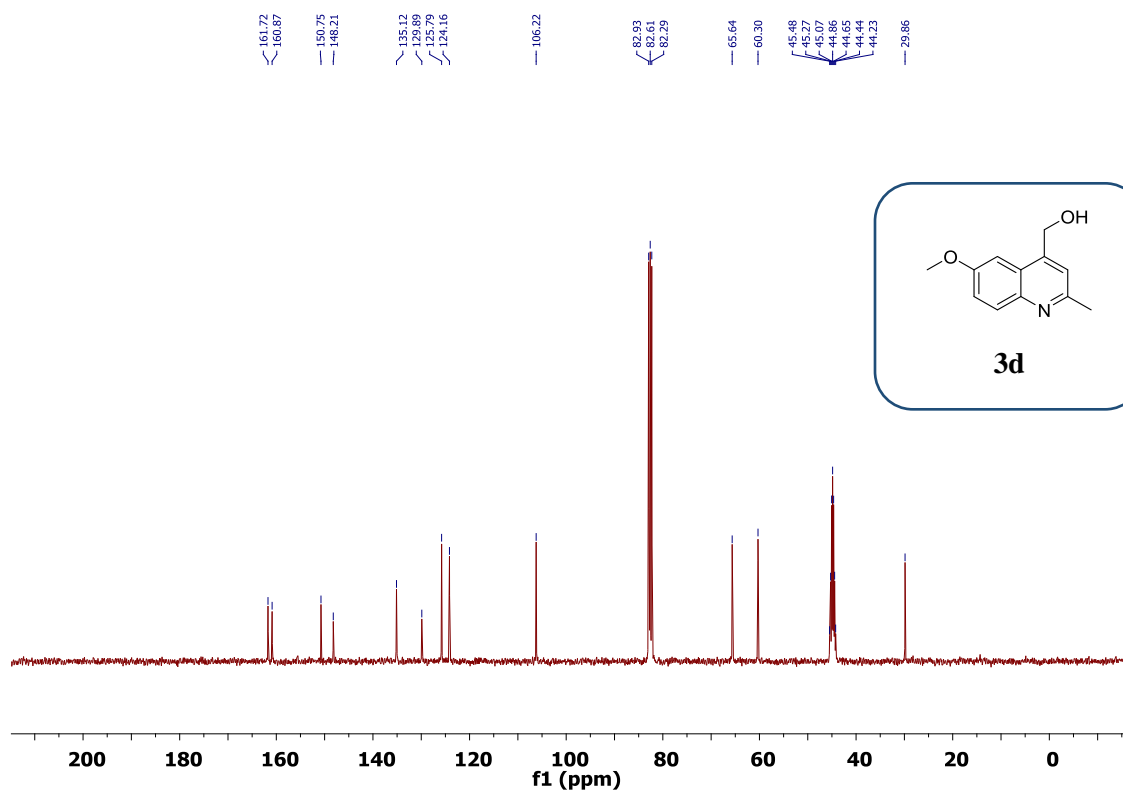

$^1\text{H}$ ,  $^{13}\text{C}$  and  $^{19}\text{F}$  spectra for compound 3e:

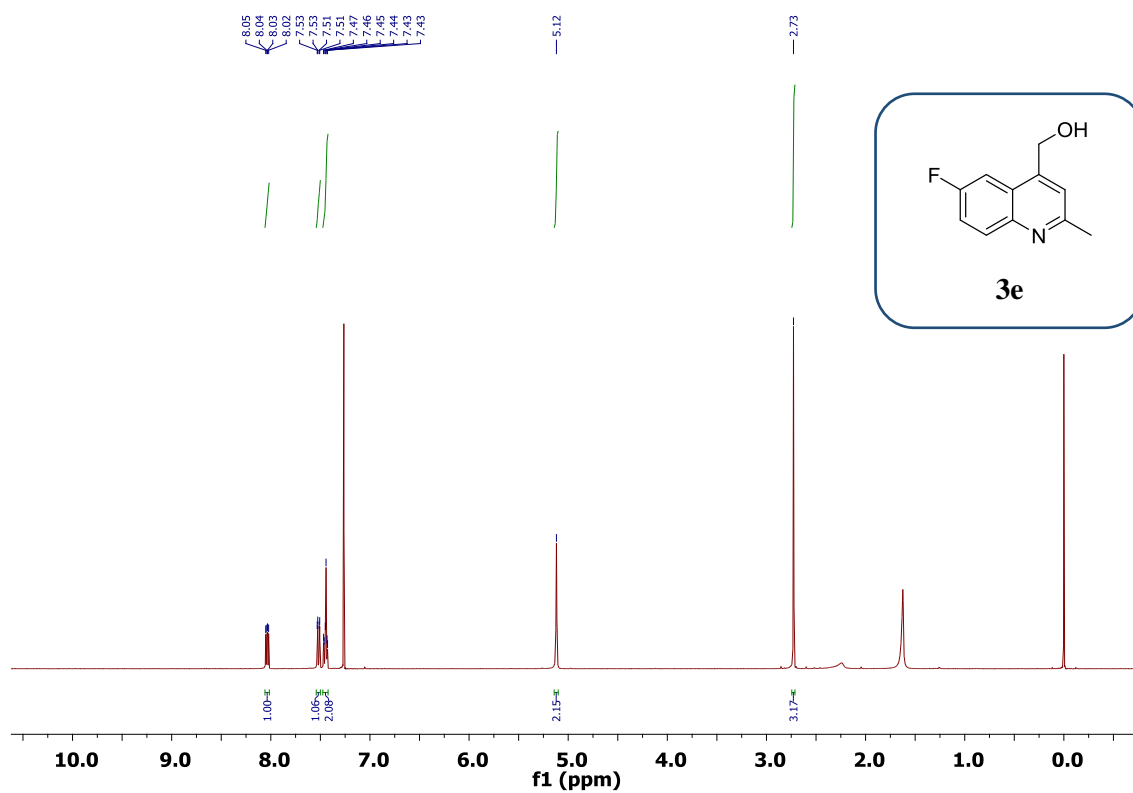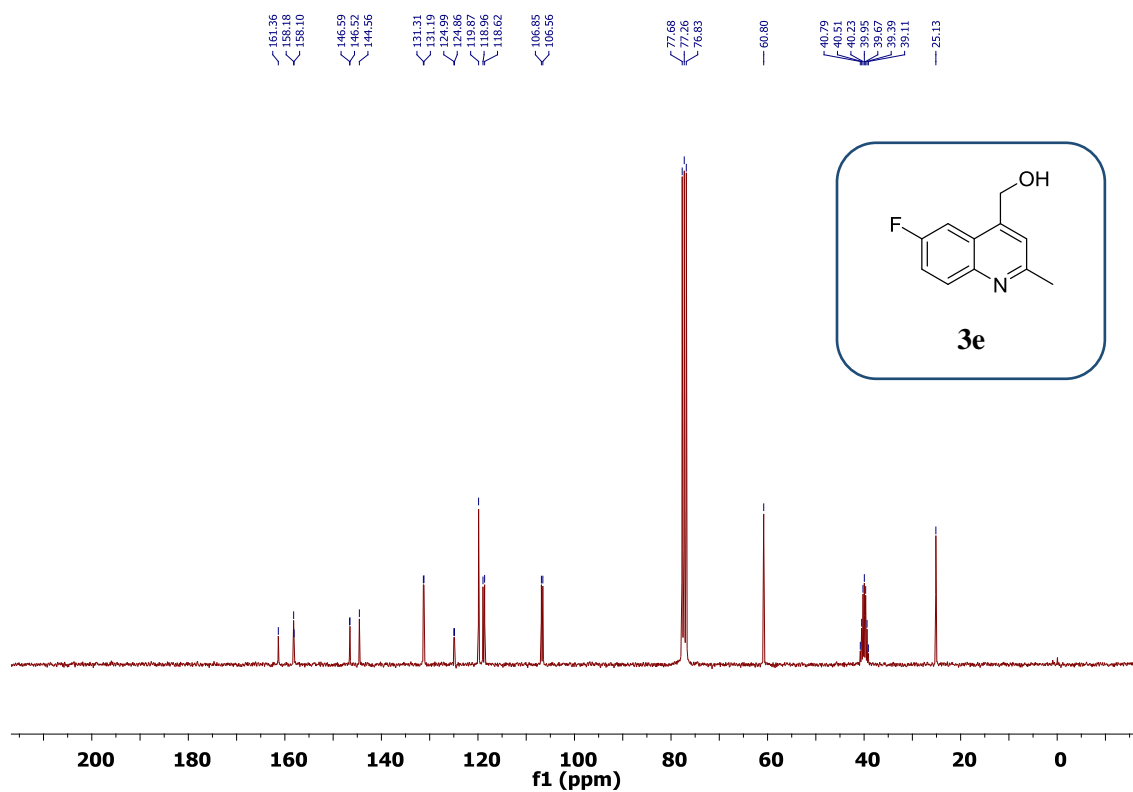

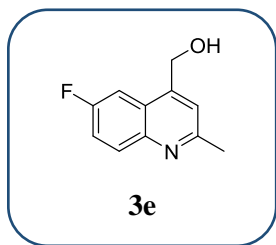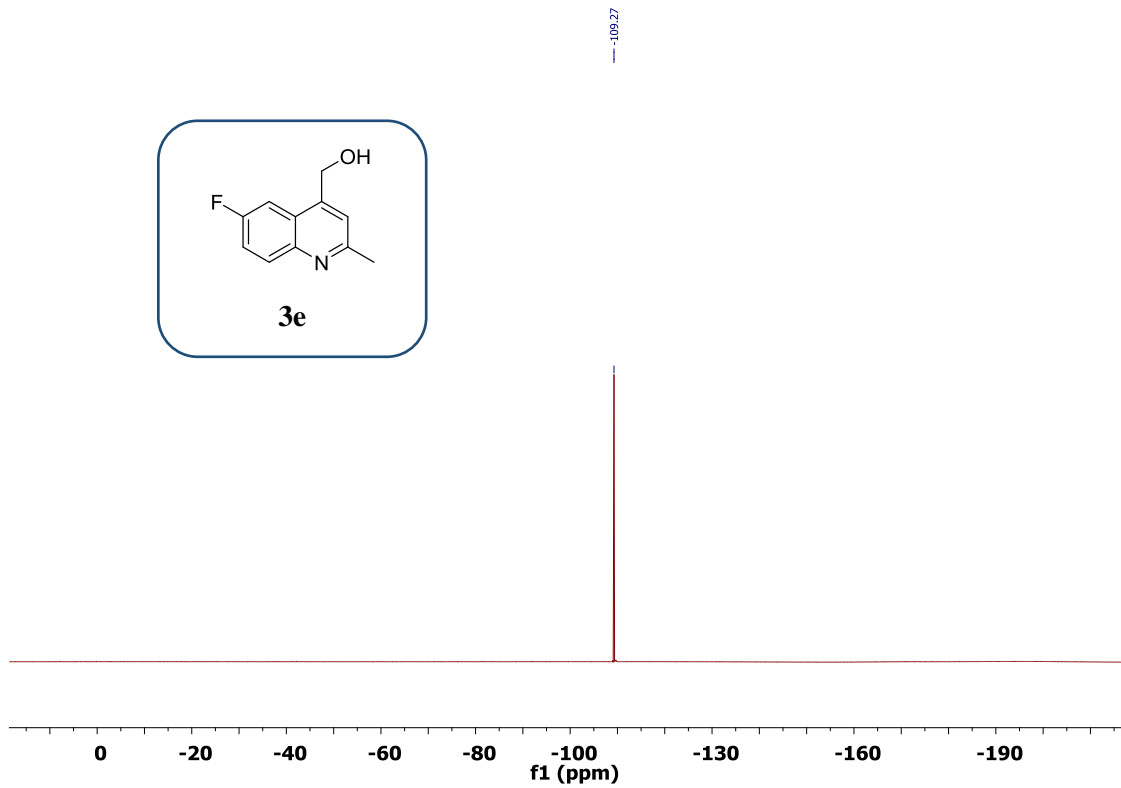

# $^1\text{H}$ and $^{13}\text{C}$ spectra for compound 3f:

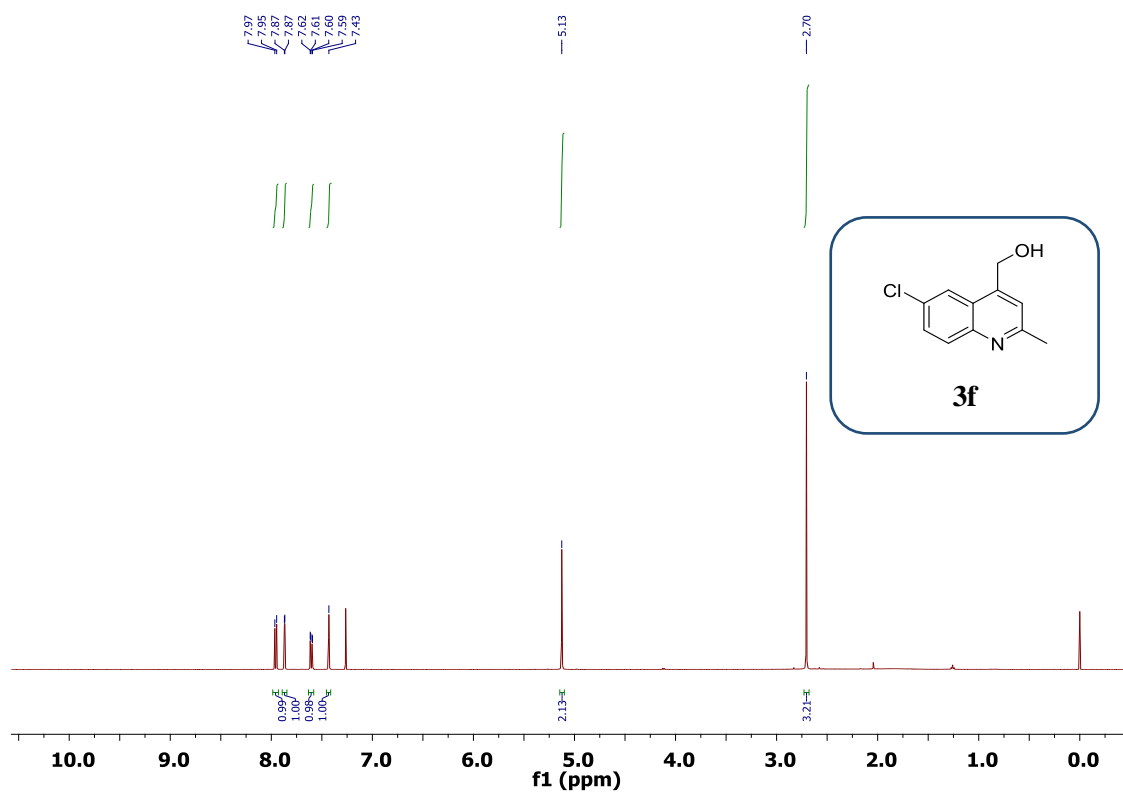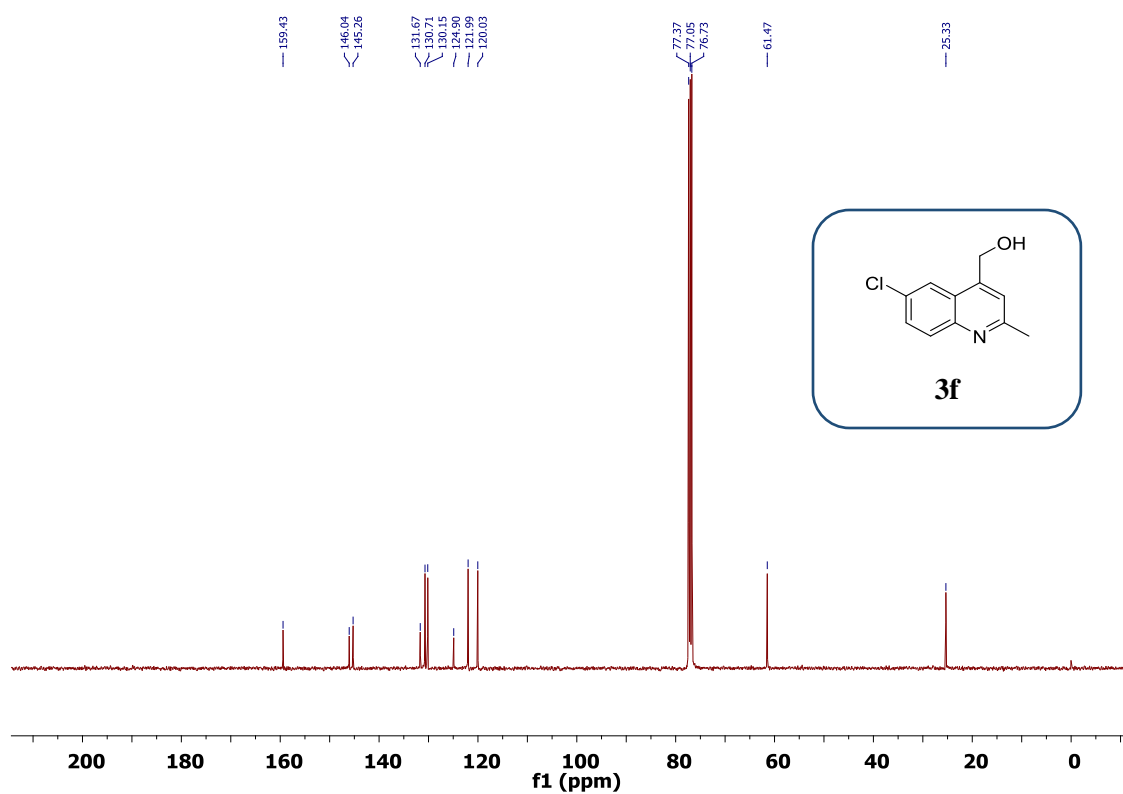



# $^1\text{H}$ and $^{13}\text{C}$ spectra for compound **3g**:

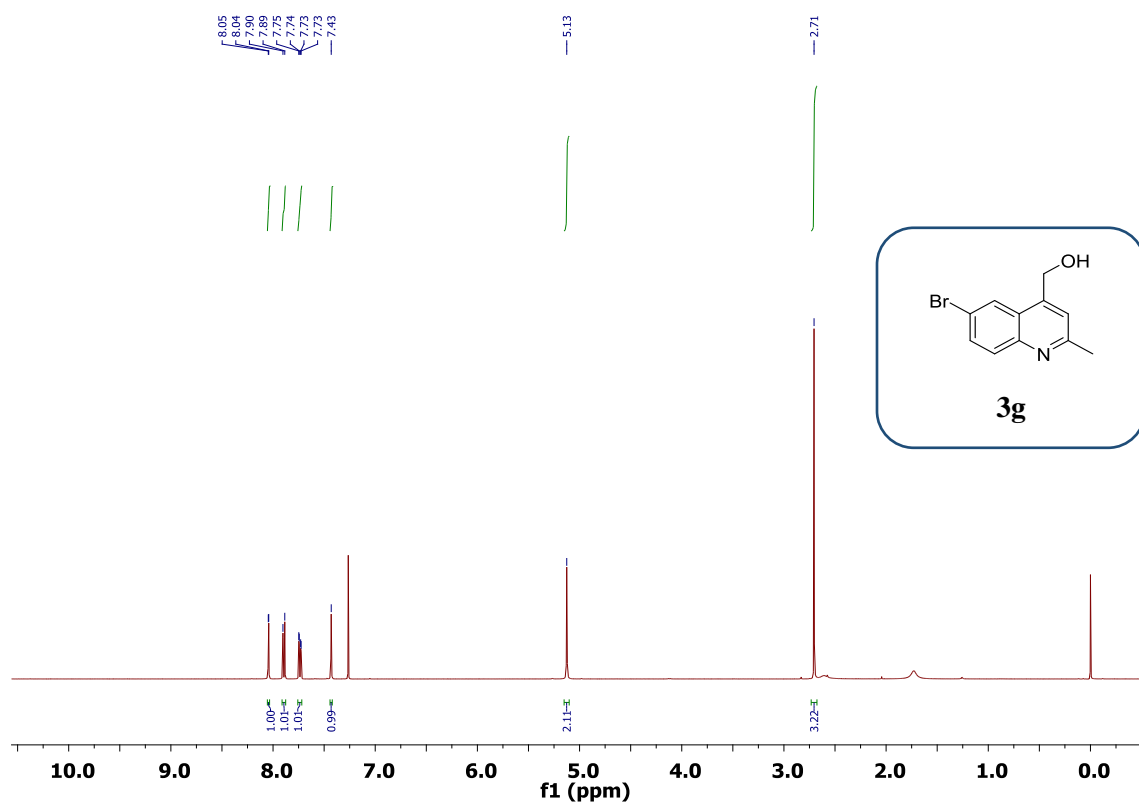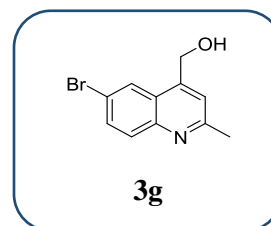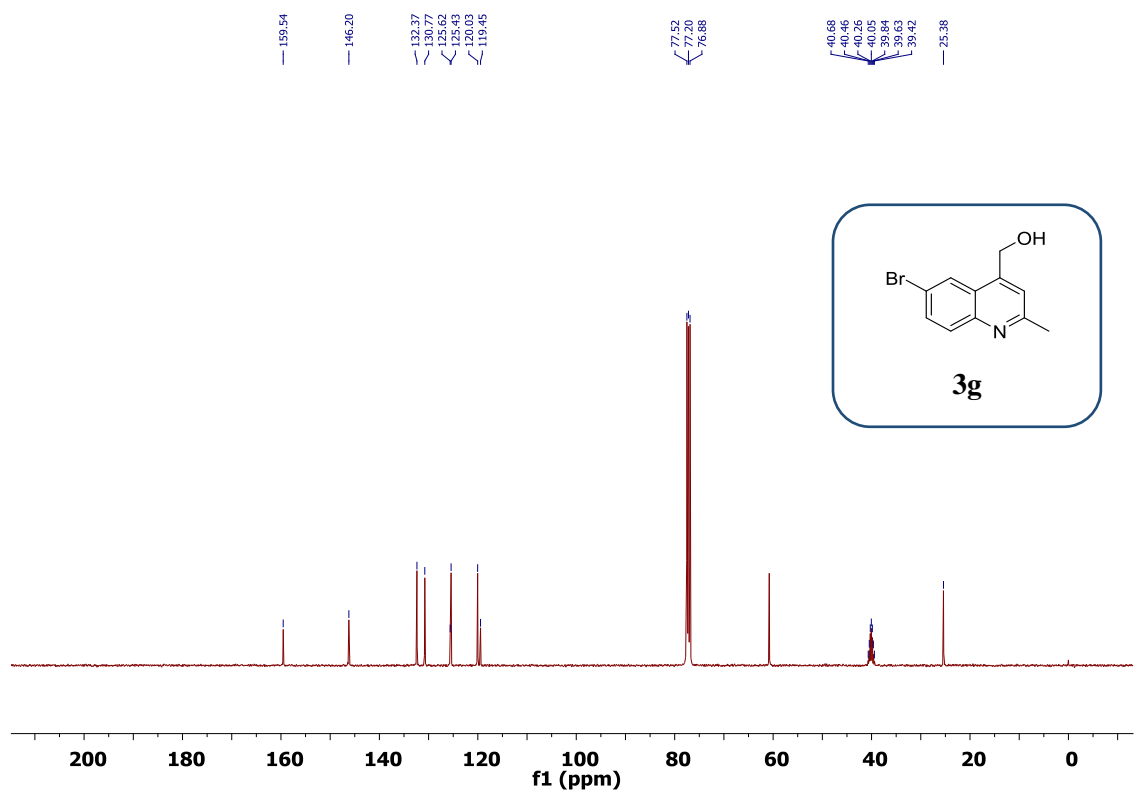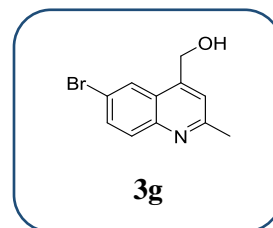

# $^1\text{H}$ and $^{13}\text{C}$ spectra for compound 3h:

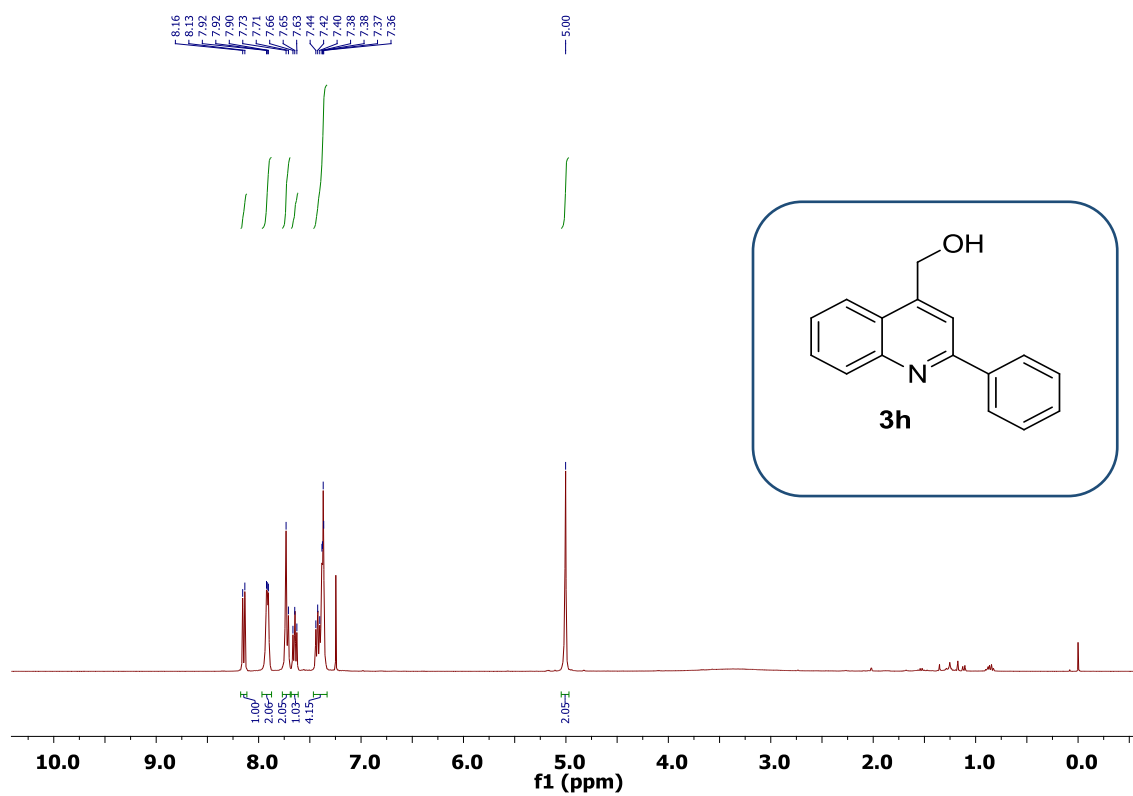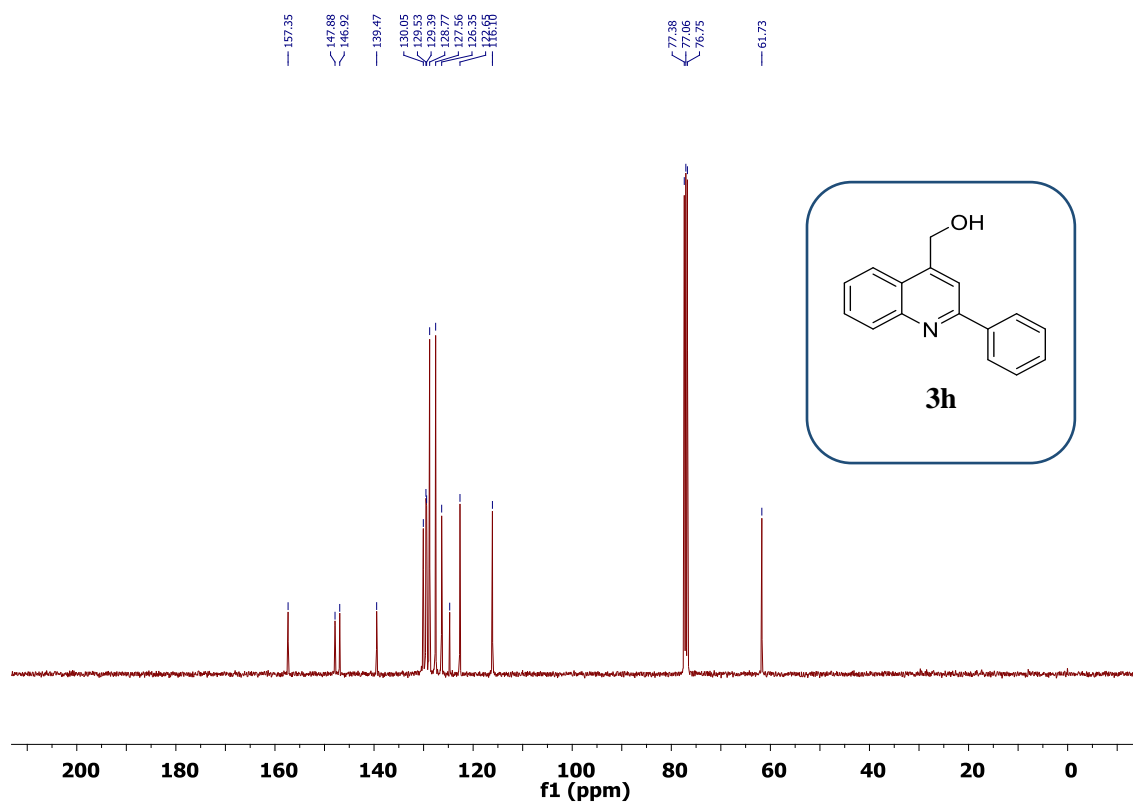

$^1\text{H}$ ,  $^{13}\text{C}$  and  $^{19}\text{F}$  spectra for compound **3i**:

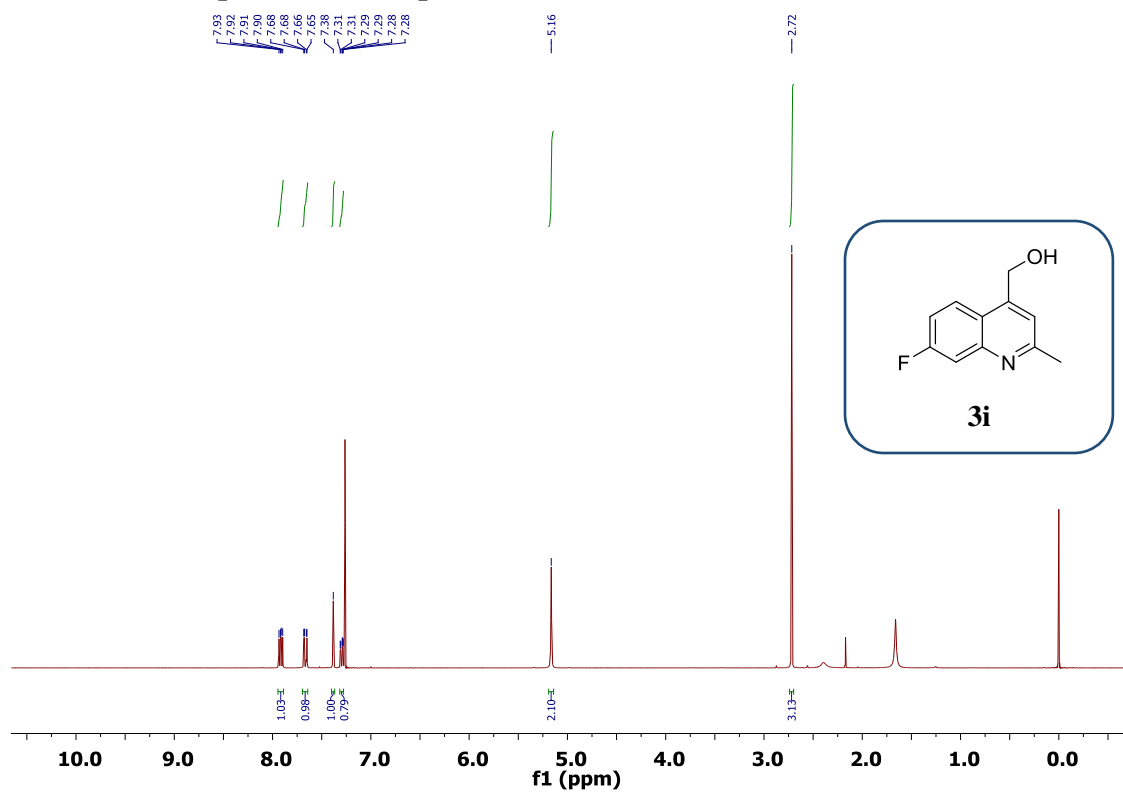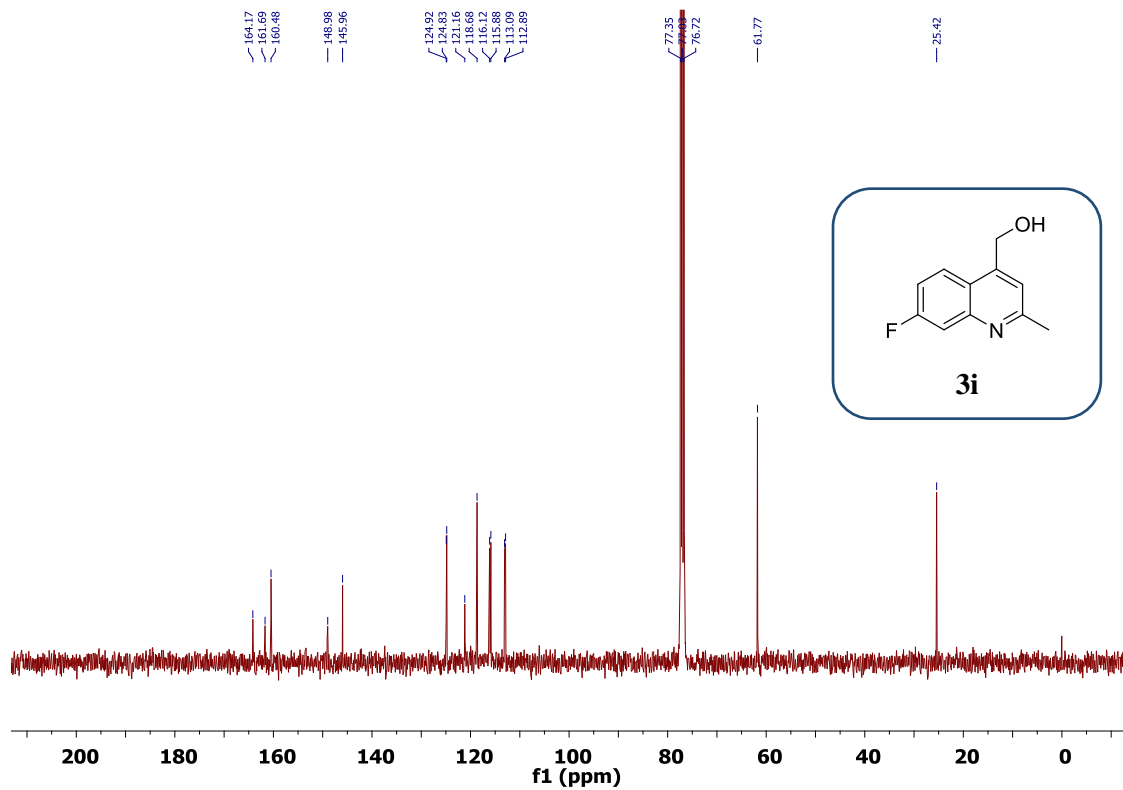

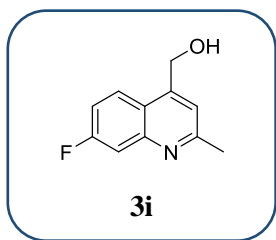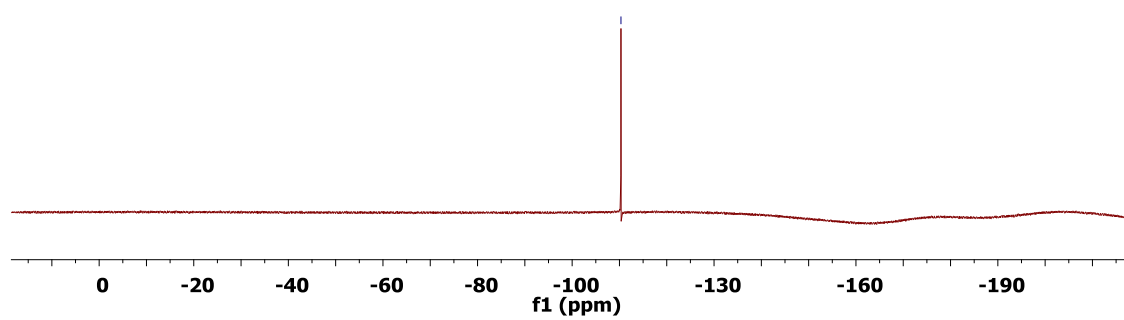

# $^1\text{H}$ and $^{13}\text{C}$ spectra for compound 3j:

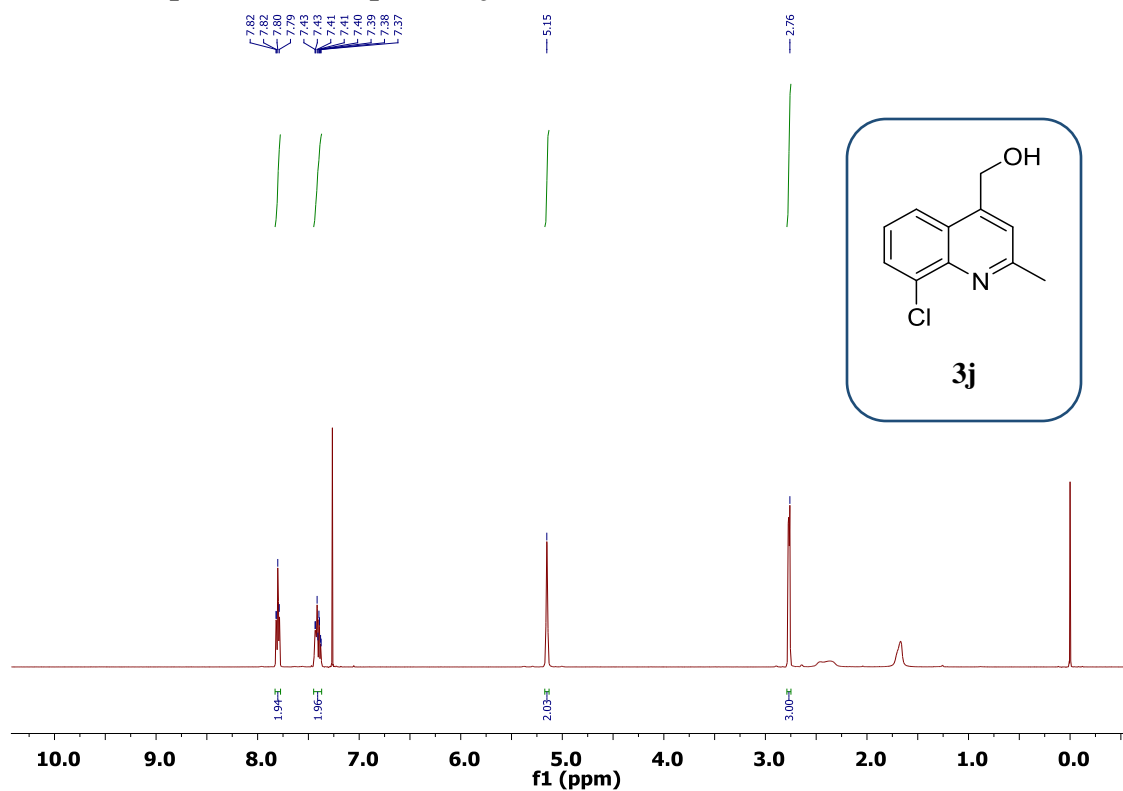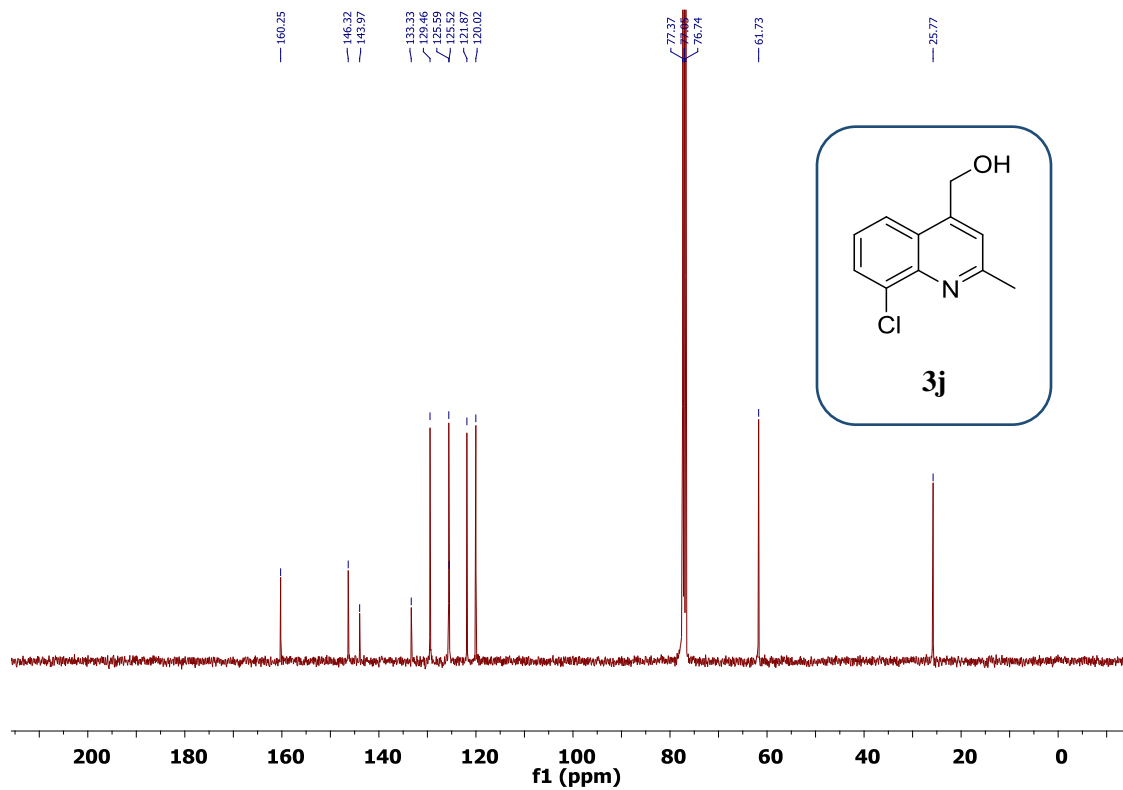

# $^1\text{H}$ and $^{13}\text{C}$ spectra for compound **3k**:

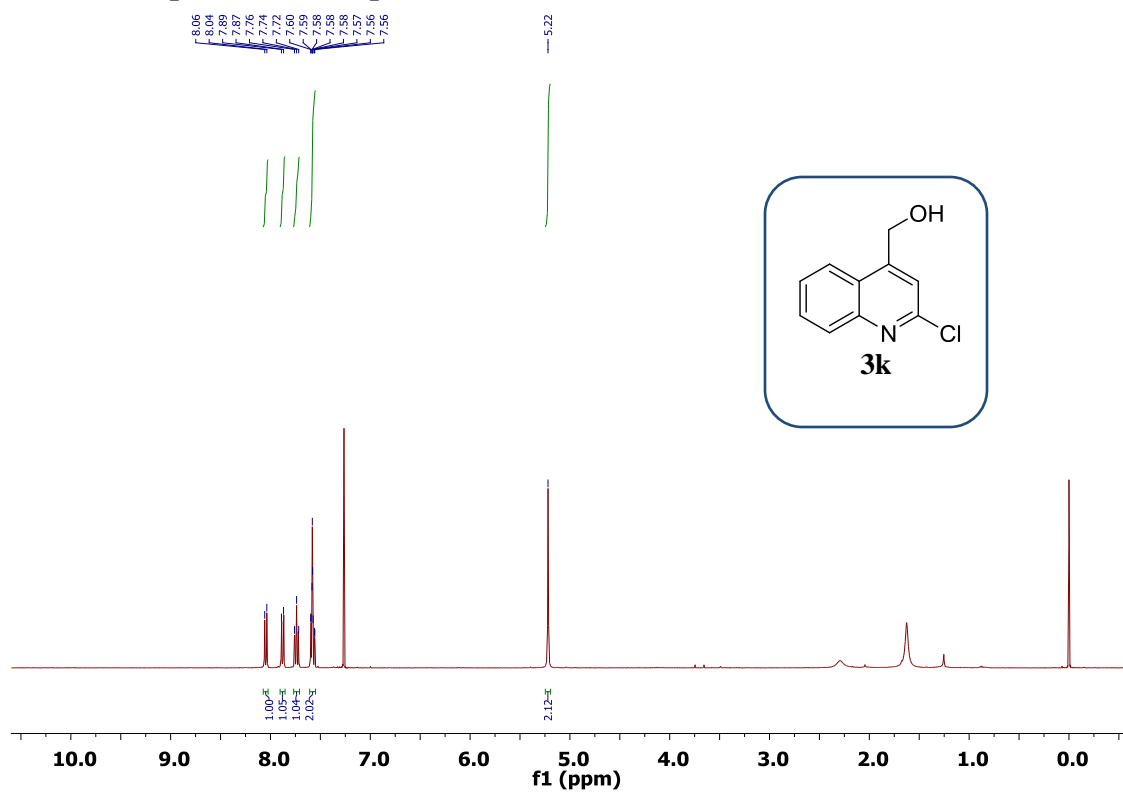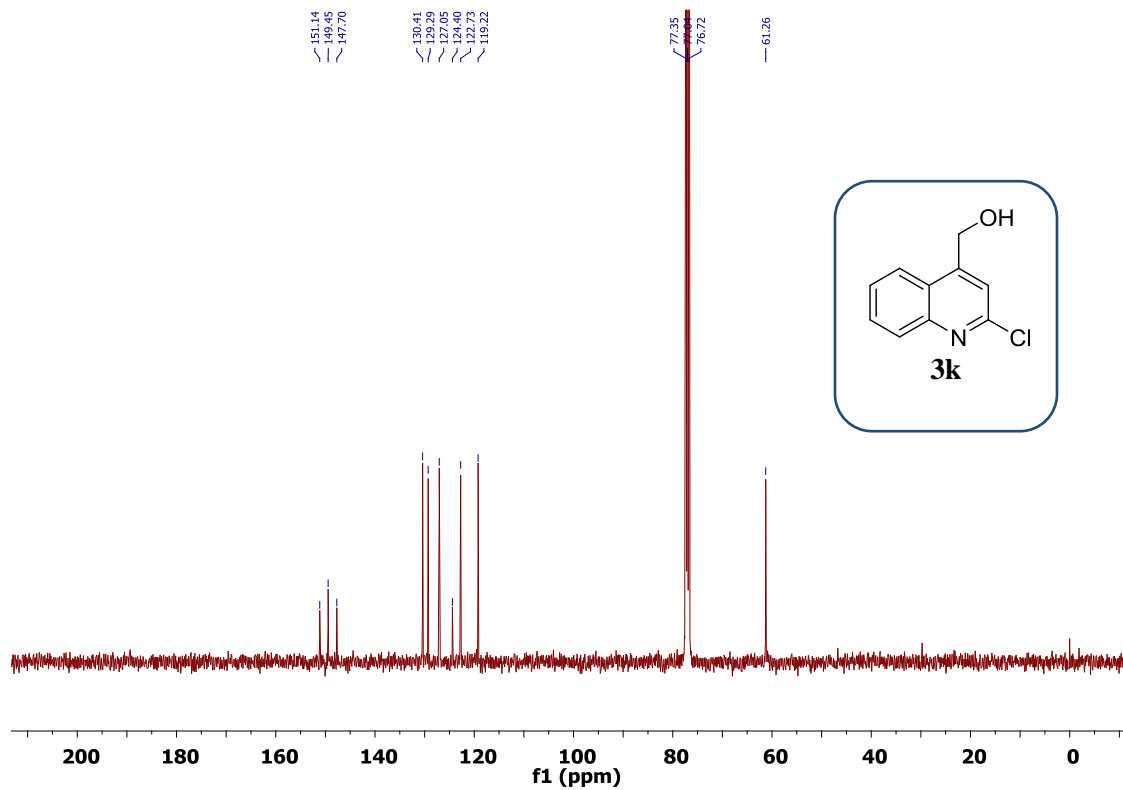

# $^1\text{H}$ and $^{13}\text{C}$ spectra for compound 3la:

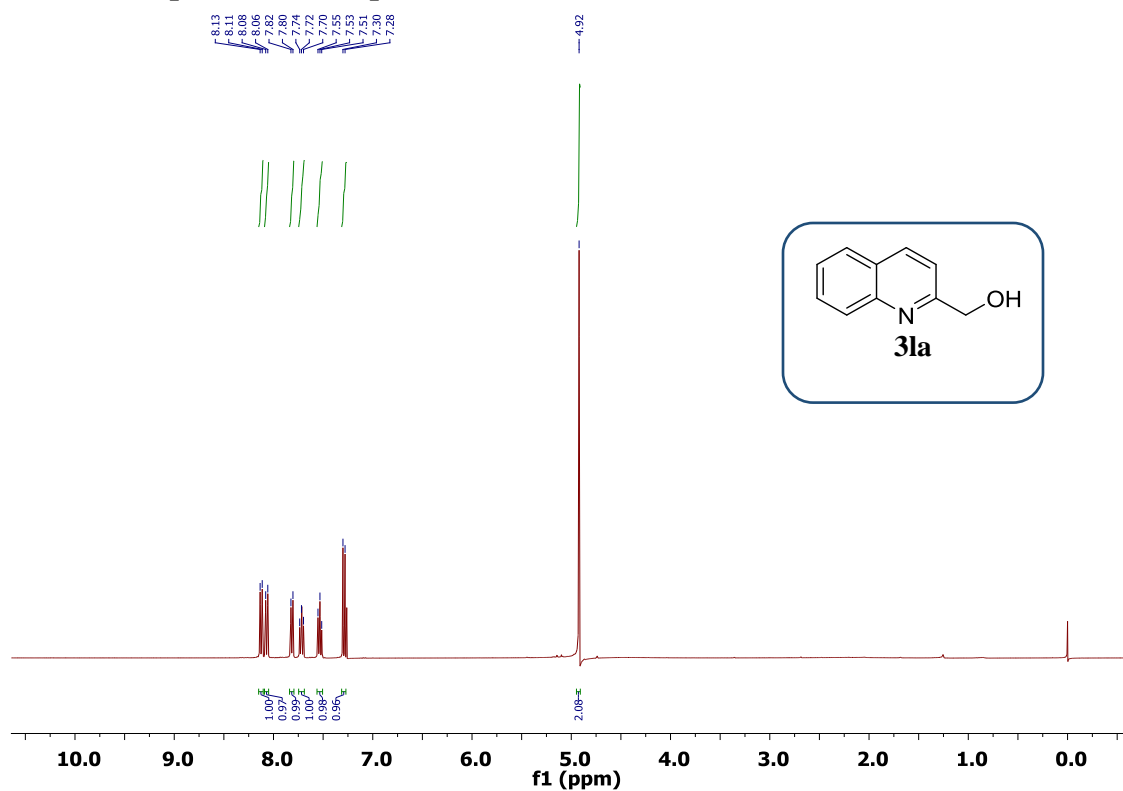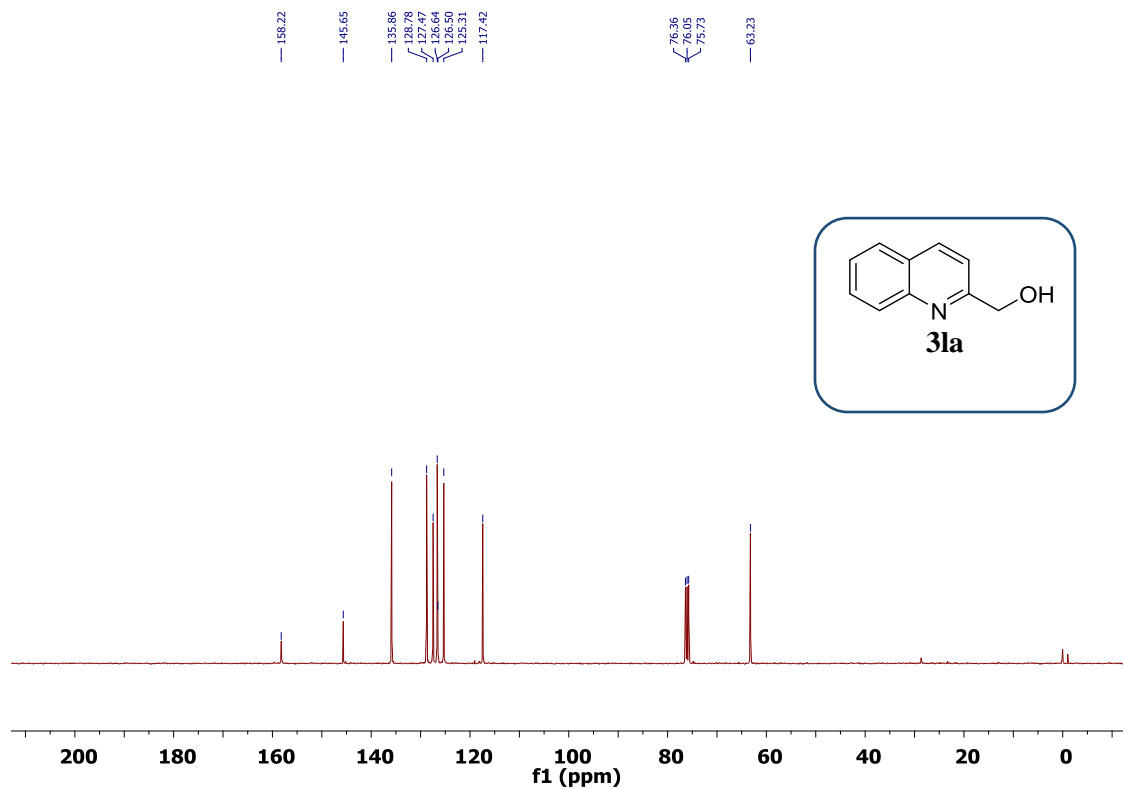

# $^1\text{H}$ and $^{13}\text{C}$ spectra for compound 3lb:

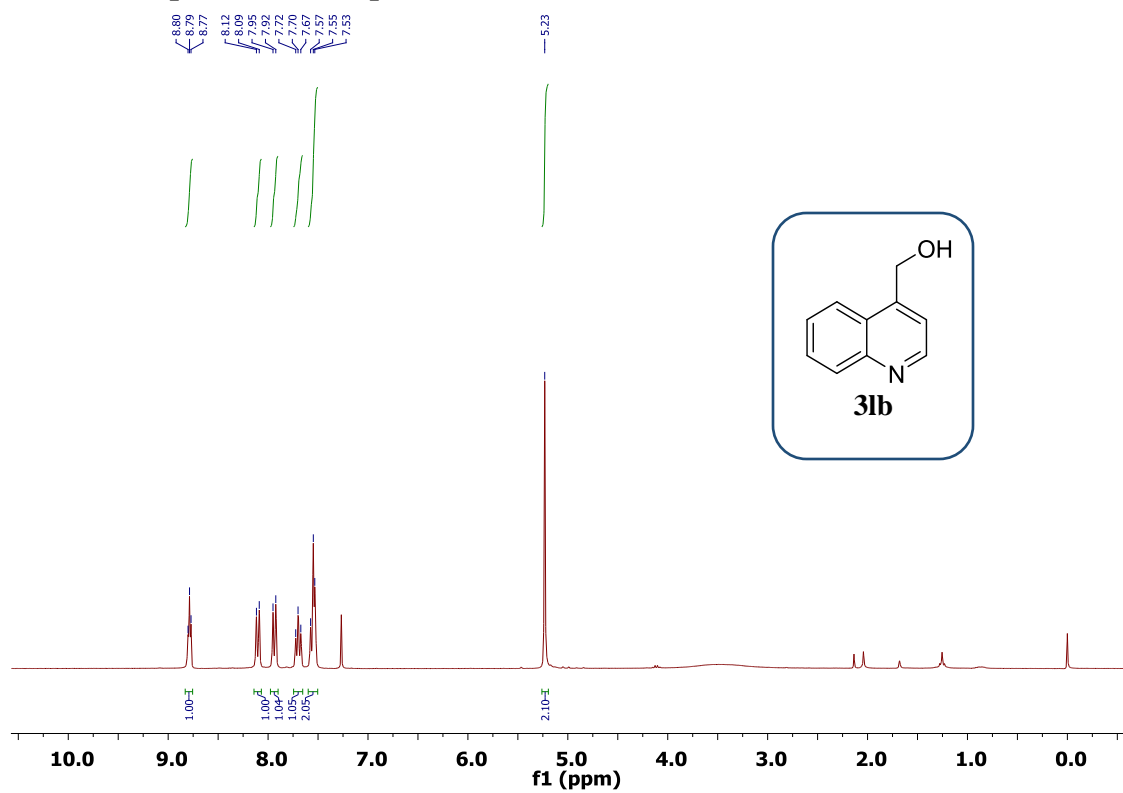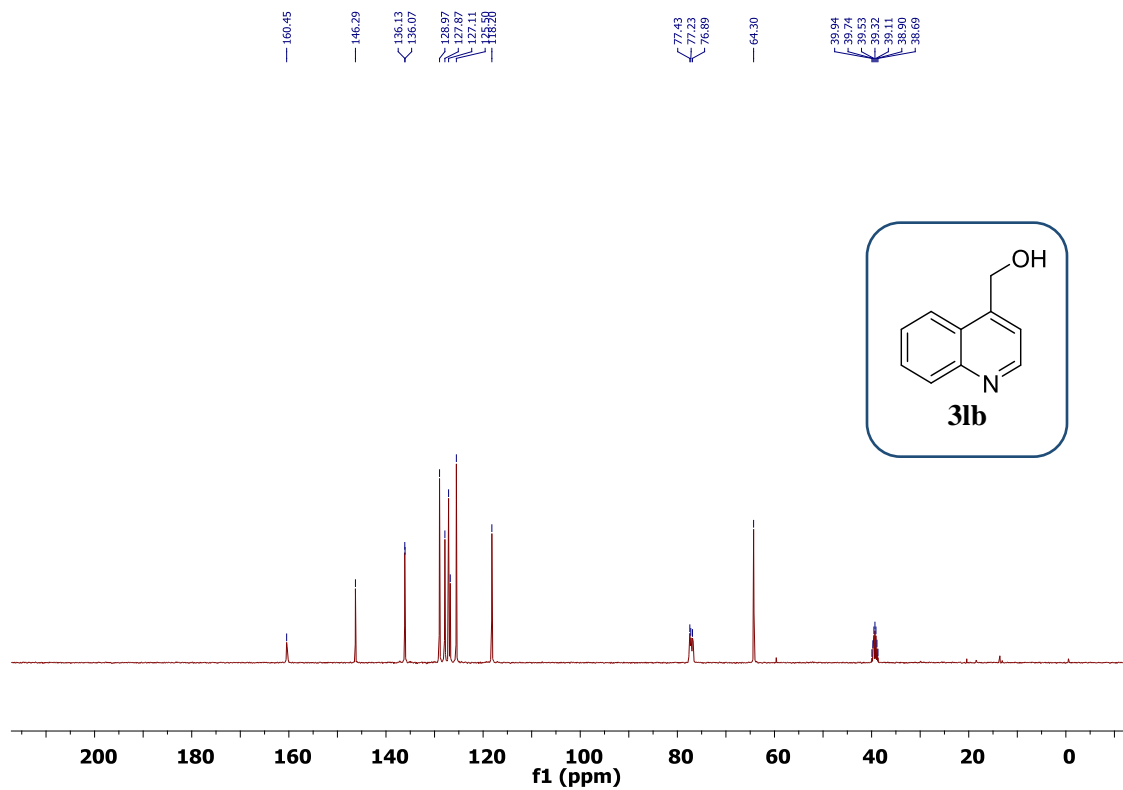



# $^1\text{H}$ and $^{13}\text{C}$ spectra for compound 3lc:

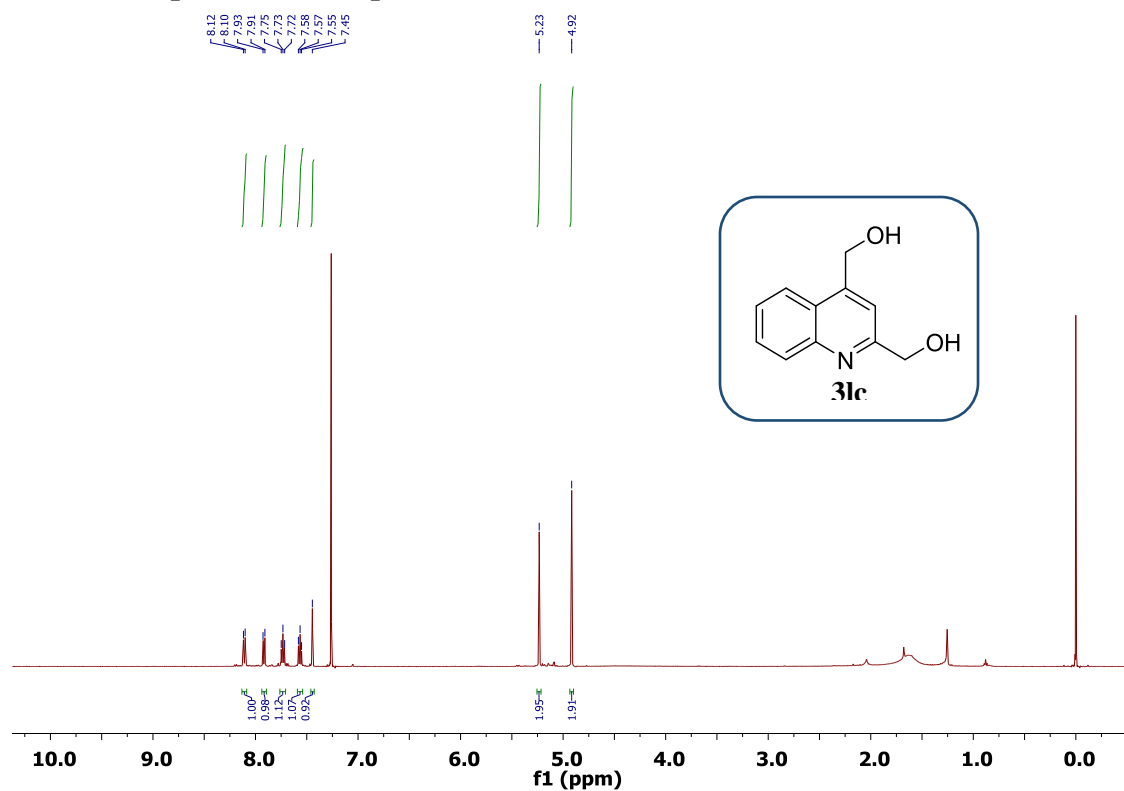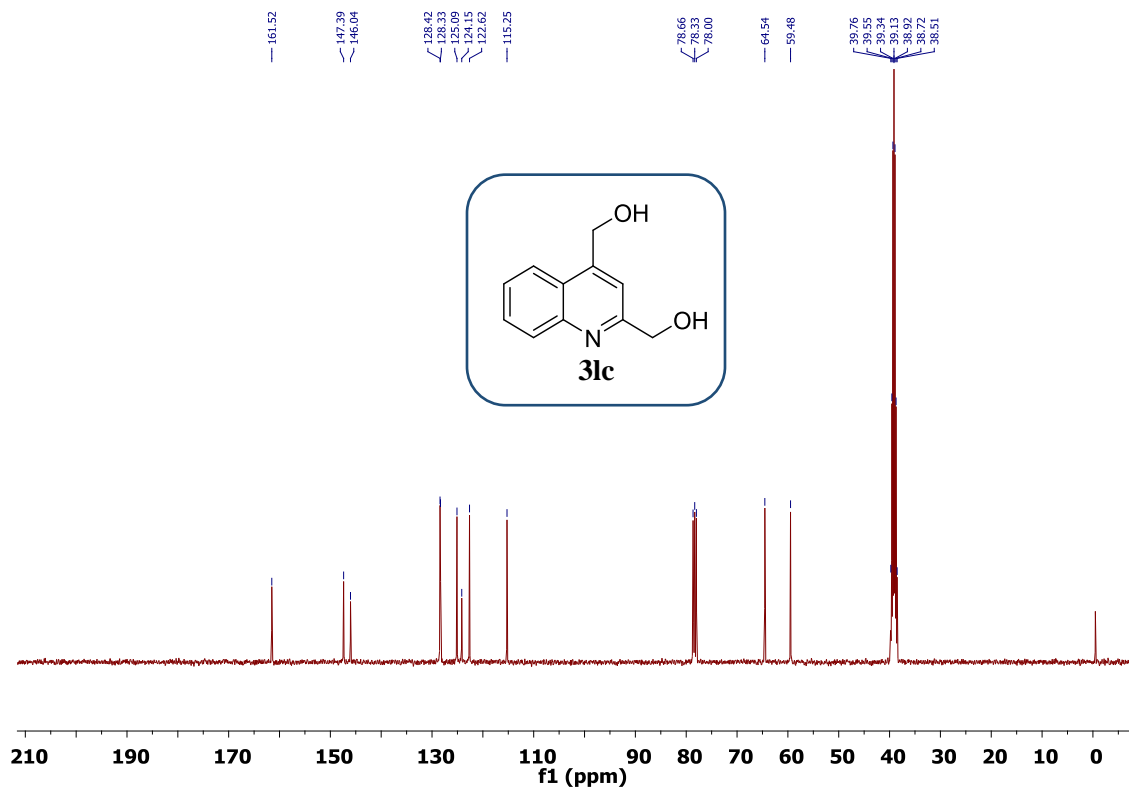

# $^1\text{H}$ and $^{13}\text{C}$ spectra for compound 3ma:

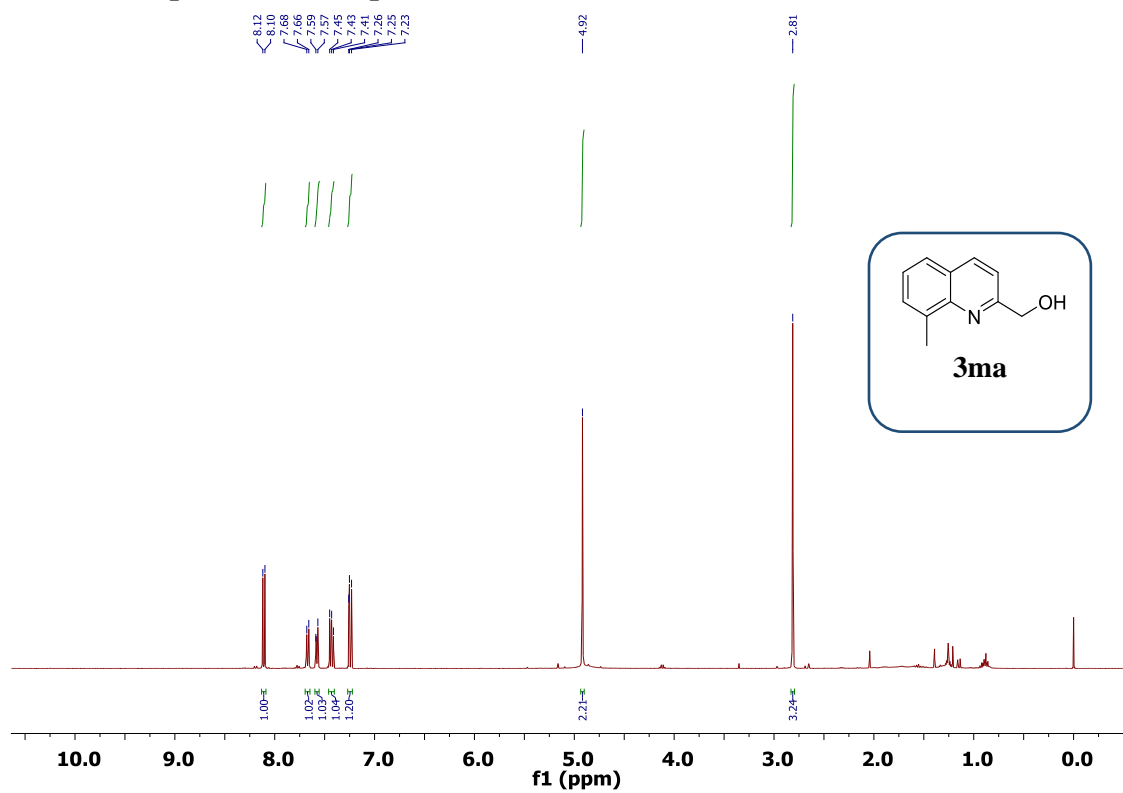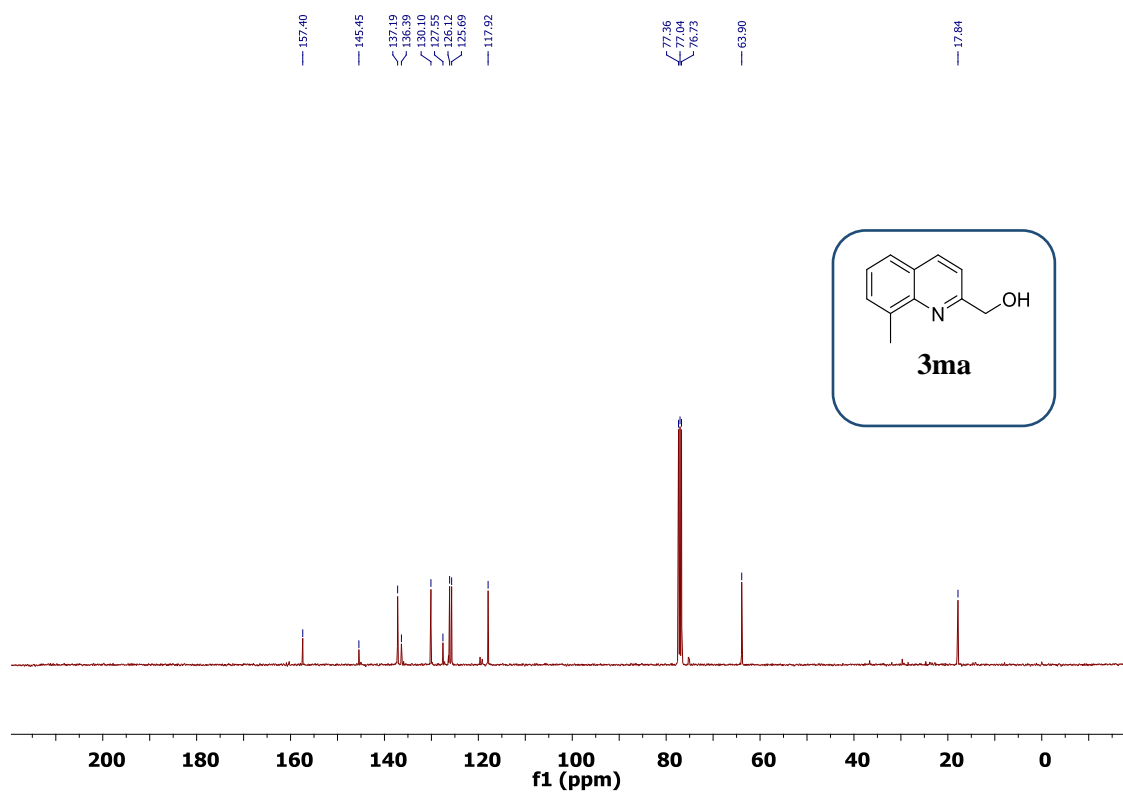

# $^1\text{H}$ and $^{13}\text{C}$ spectra for compound 3mb:

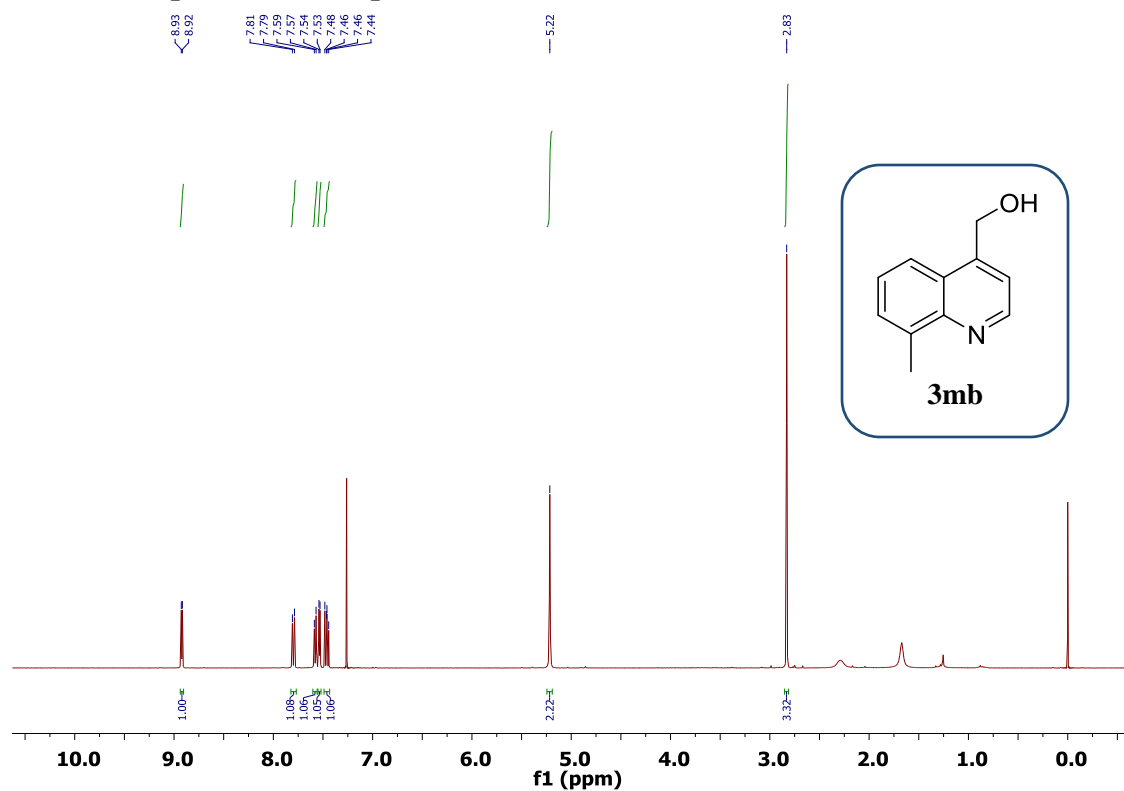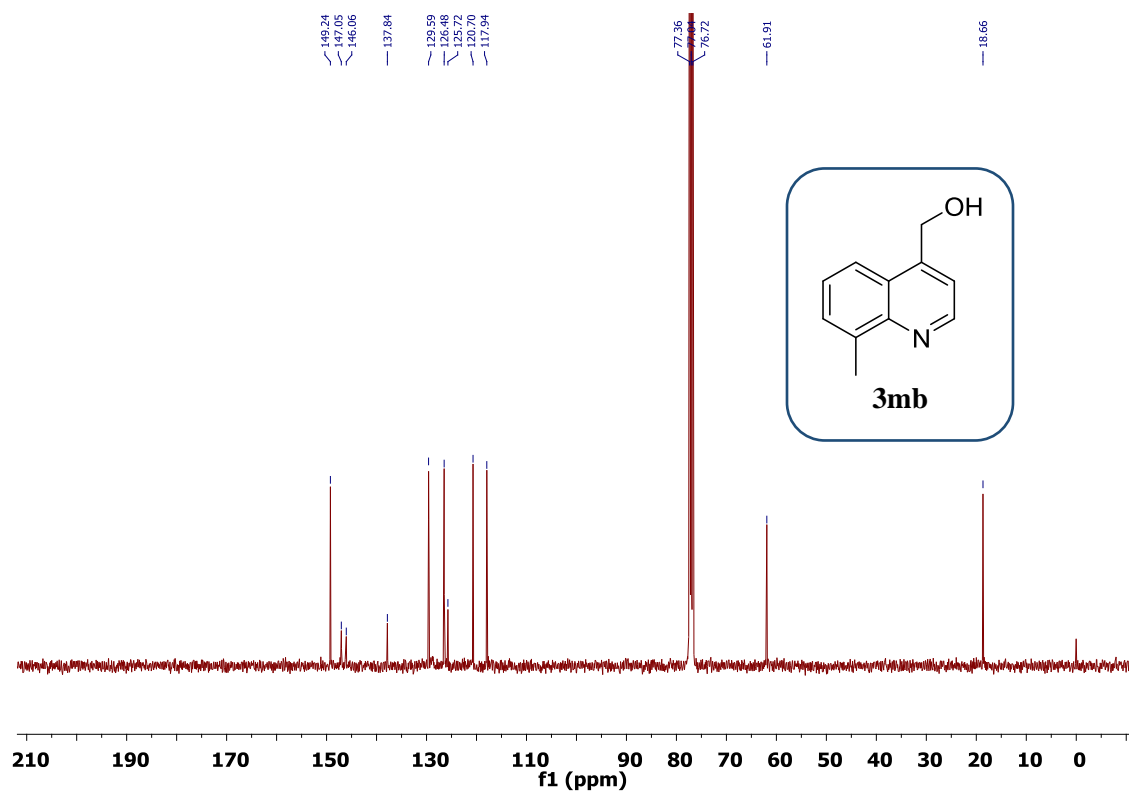

# $^1\text{H}$ and $^{13}\text{C}$ spectra for compound 3mc:

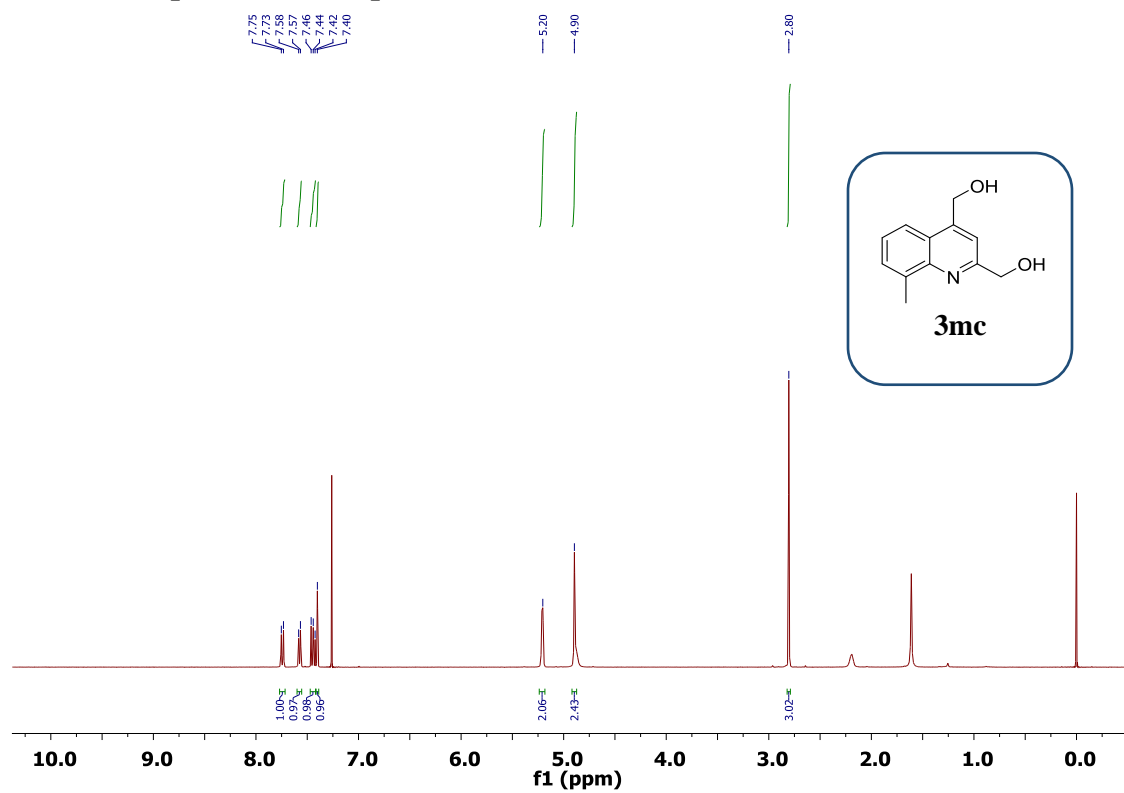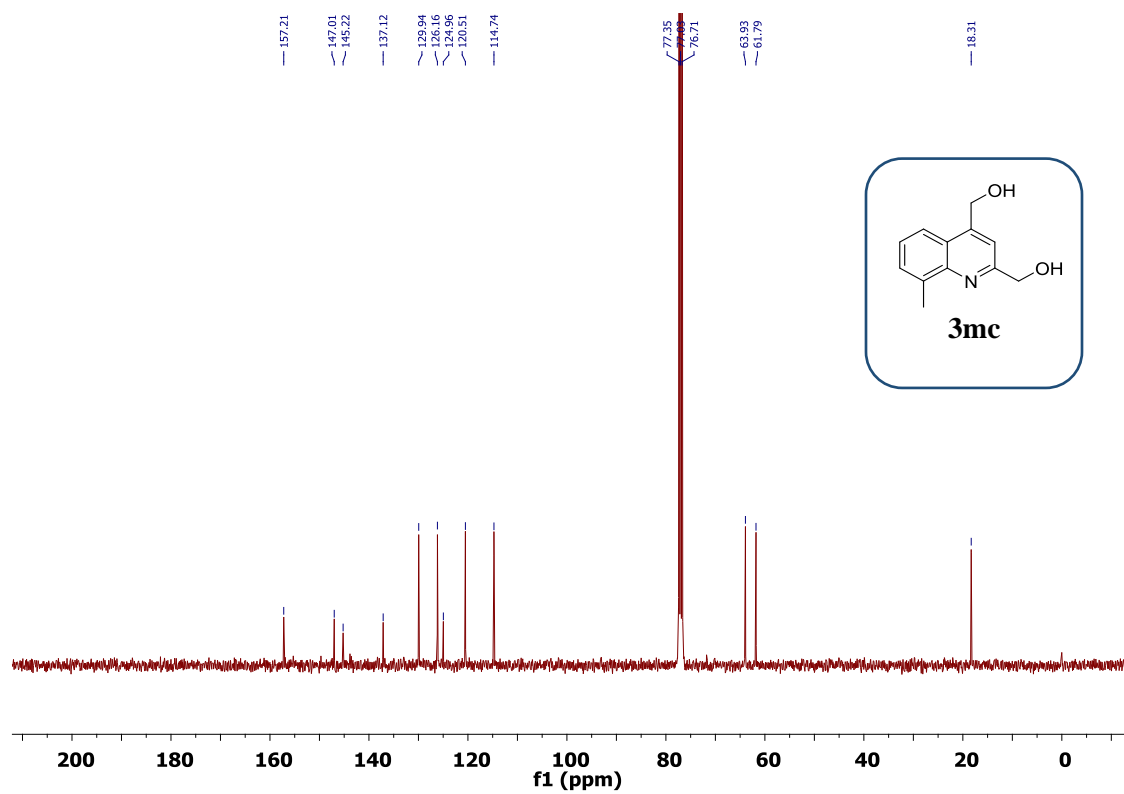

# $^1\text{H}$ and $^{13}\text{C}$ spectra for compound 3na:

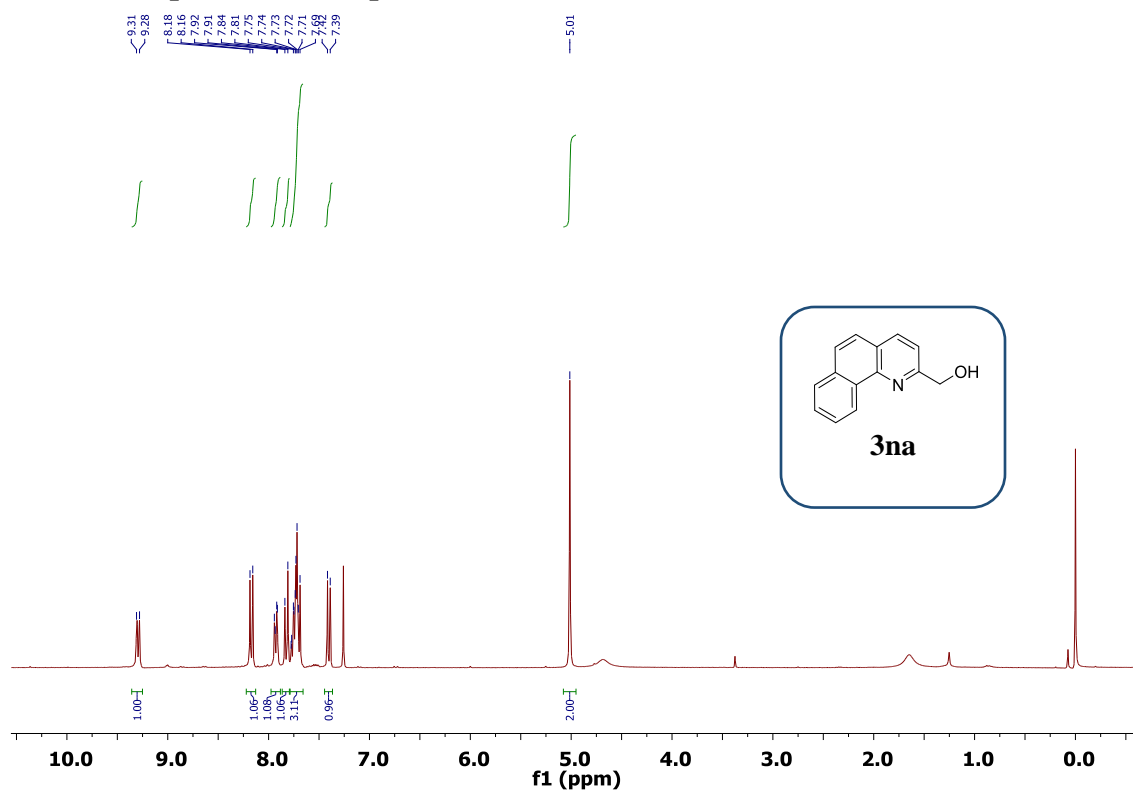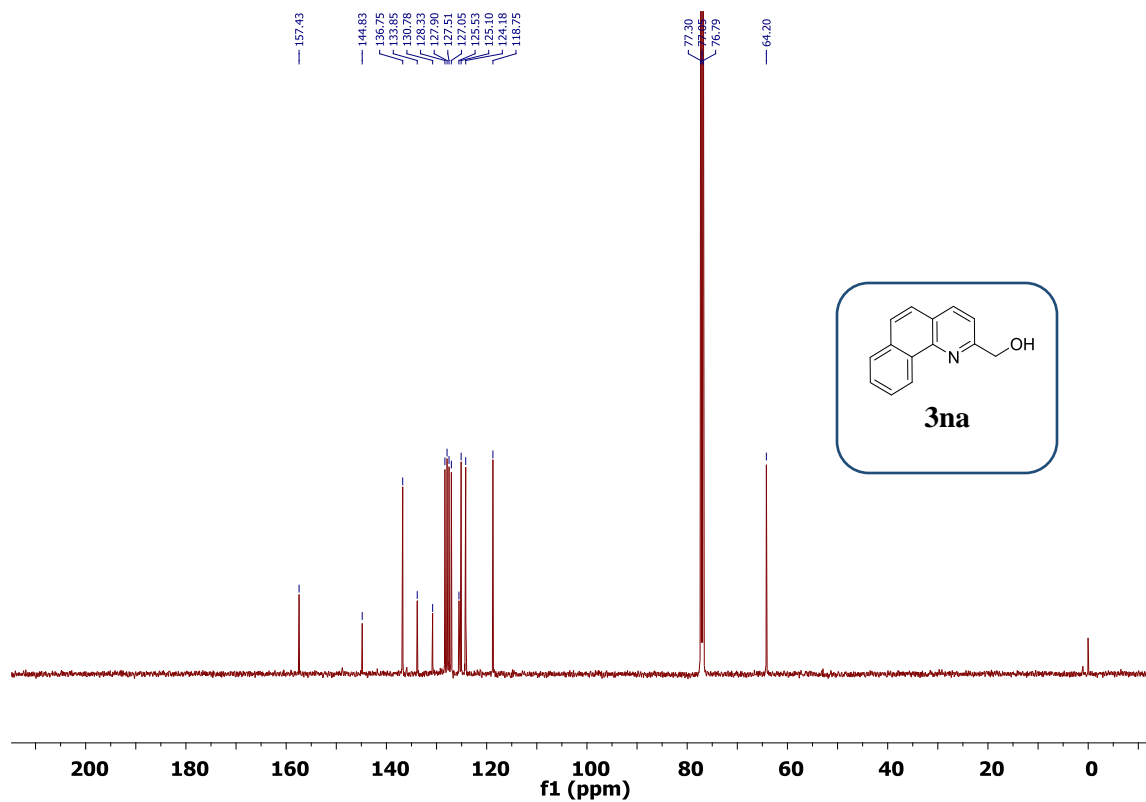

# $^1\text{H}$ and $^{13}\text{C}$ spectra for compound 3nb:

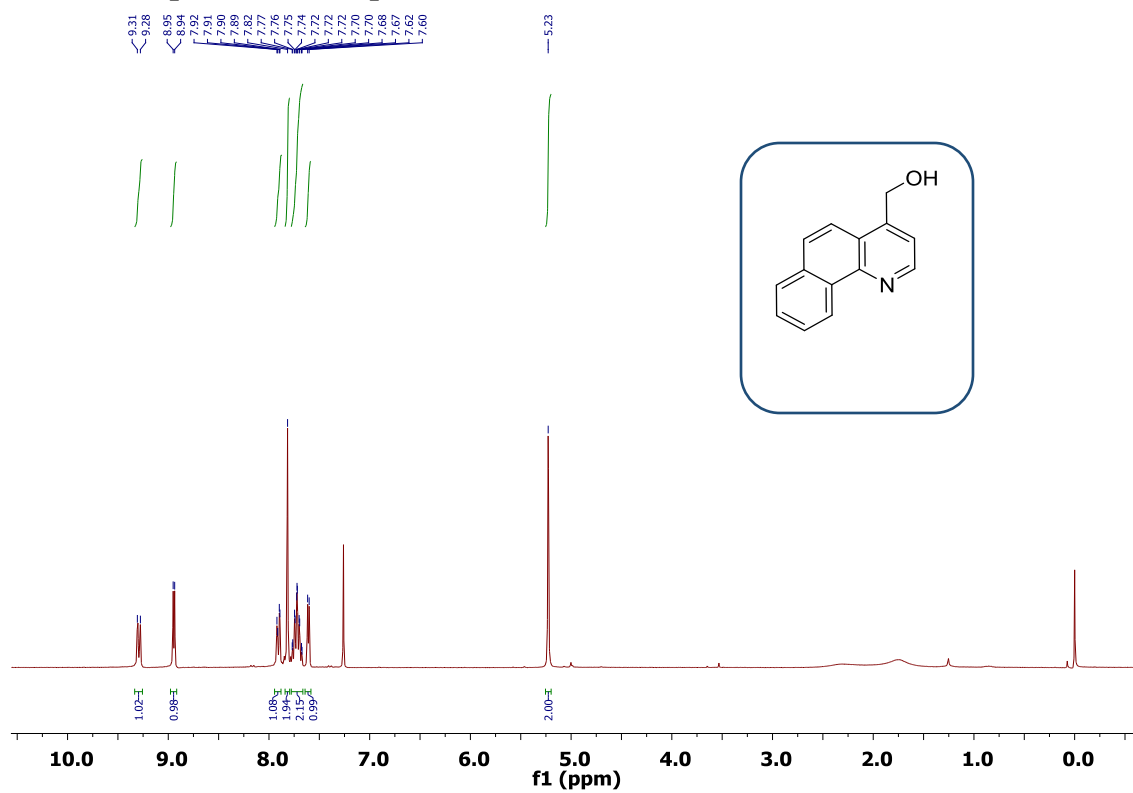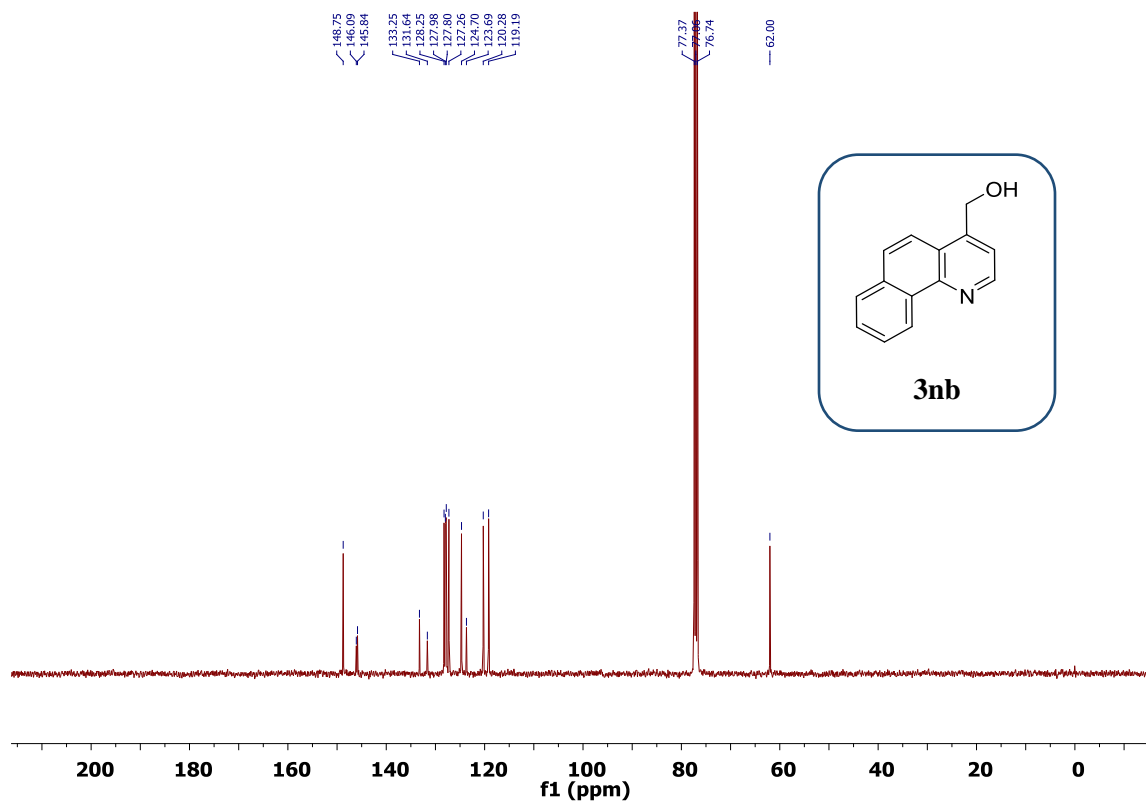

**$^1\text{H}$  and  $^{13}\text{C}$  spectra for compound 3nc:**

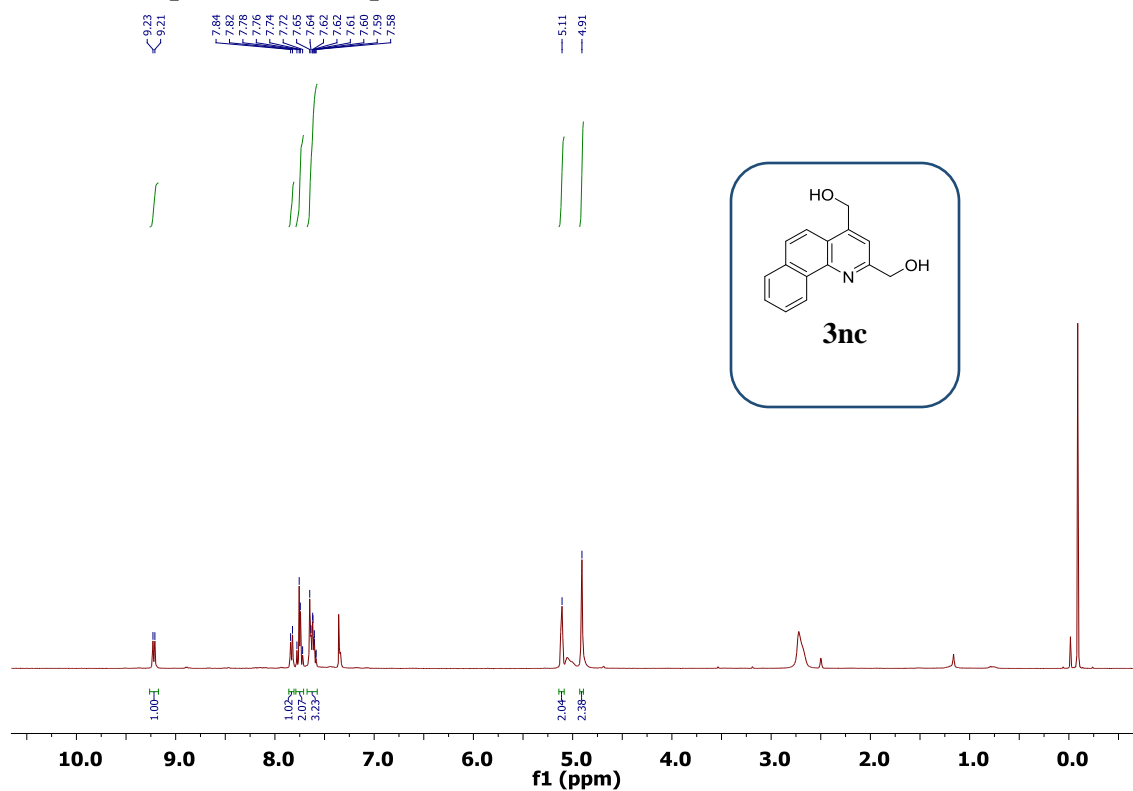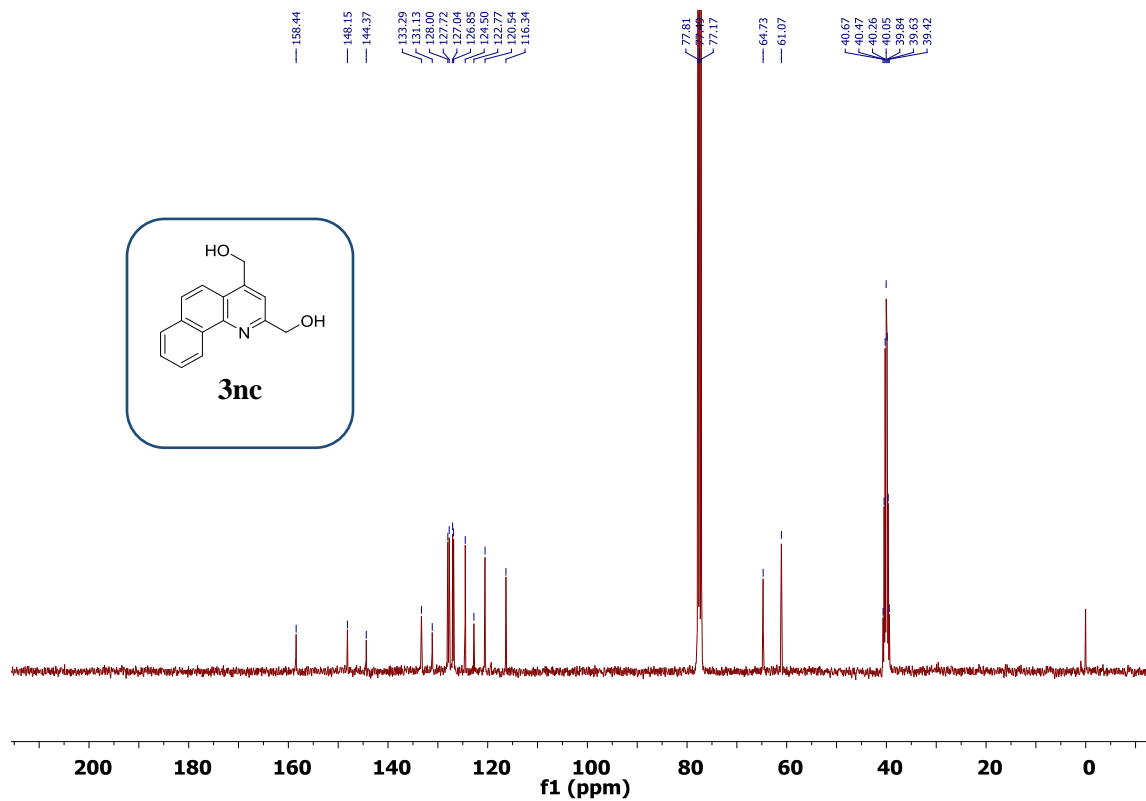

# $^1\text{H}$ and $^{13}\text{C}$ spectra for compound 30a:

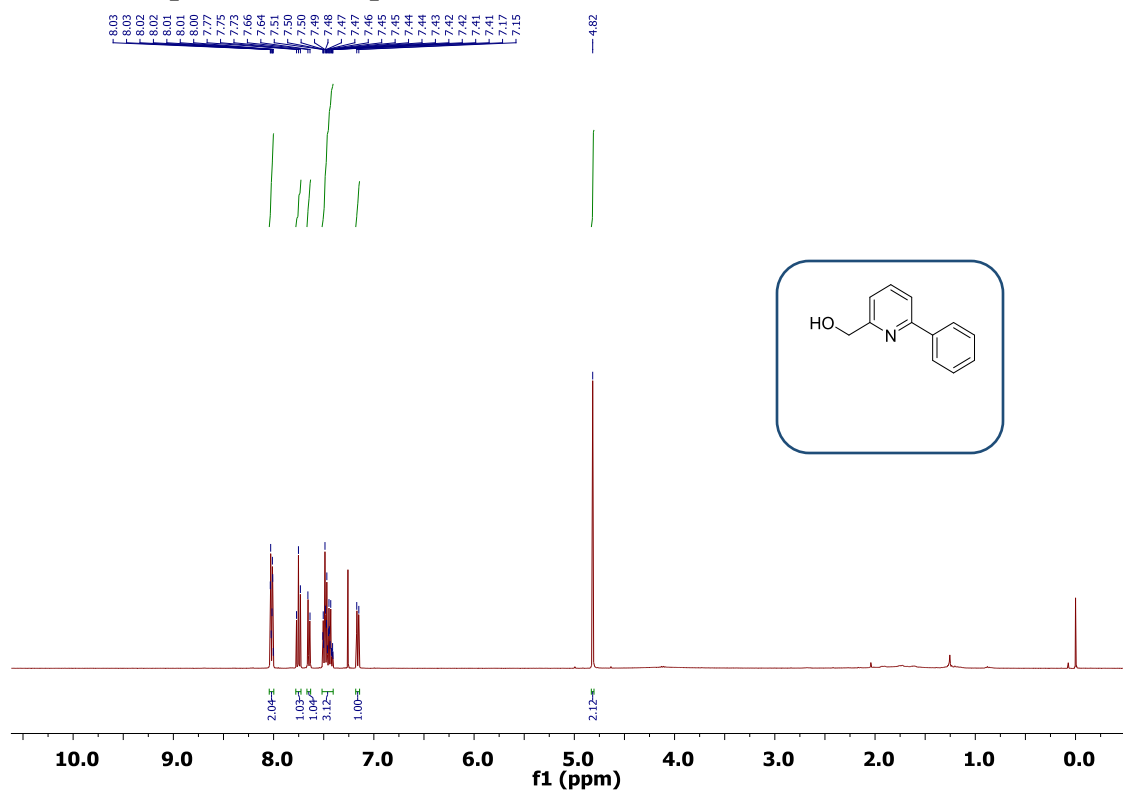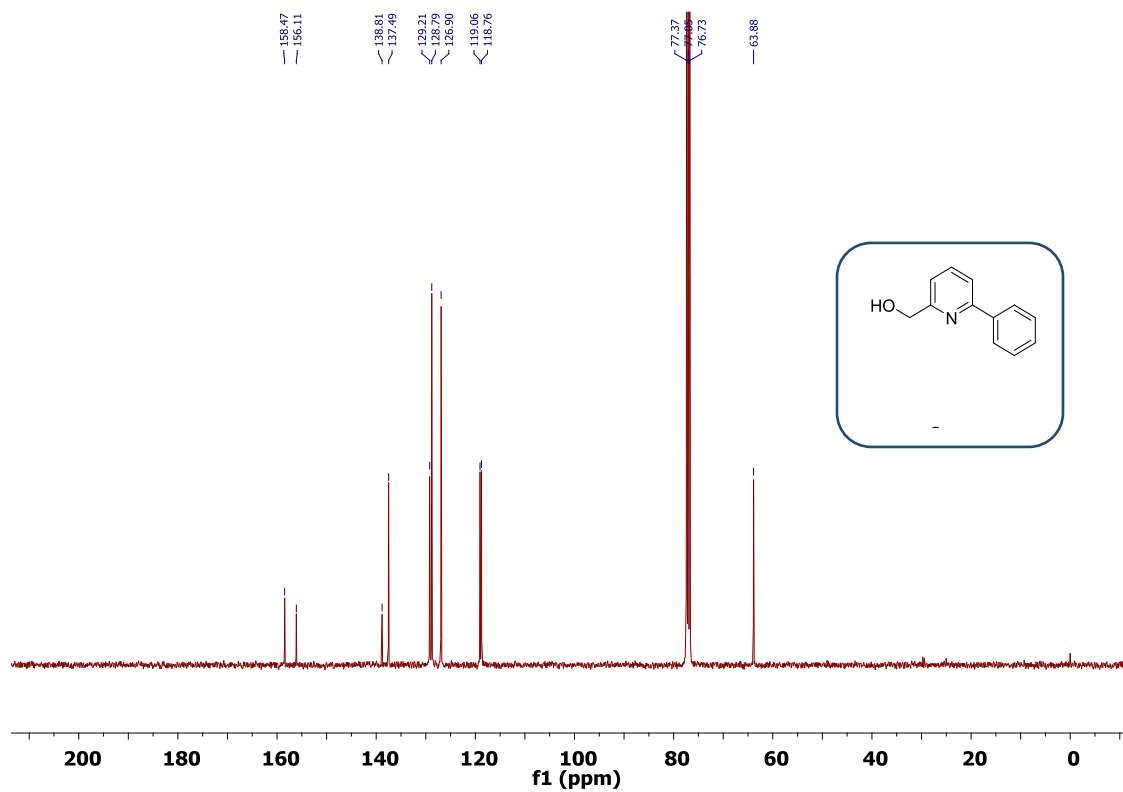



# $^1\text{H}$ and $^{13}\text{C}$ spectra for compound 3ob:

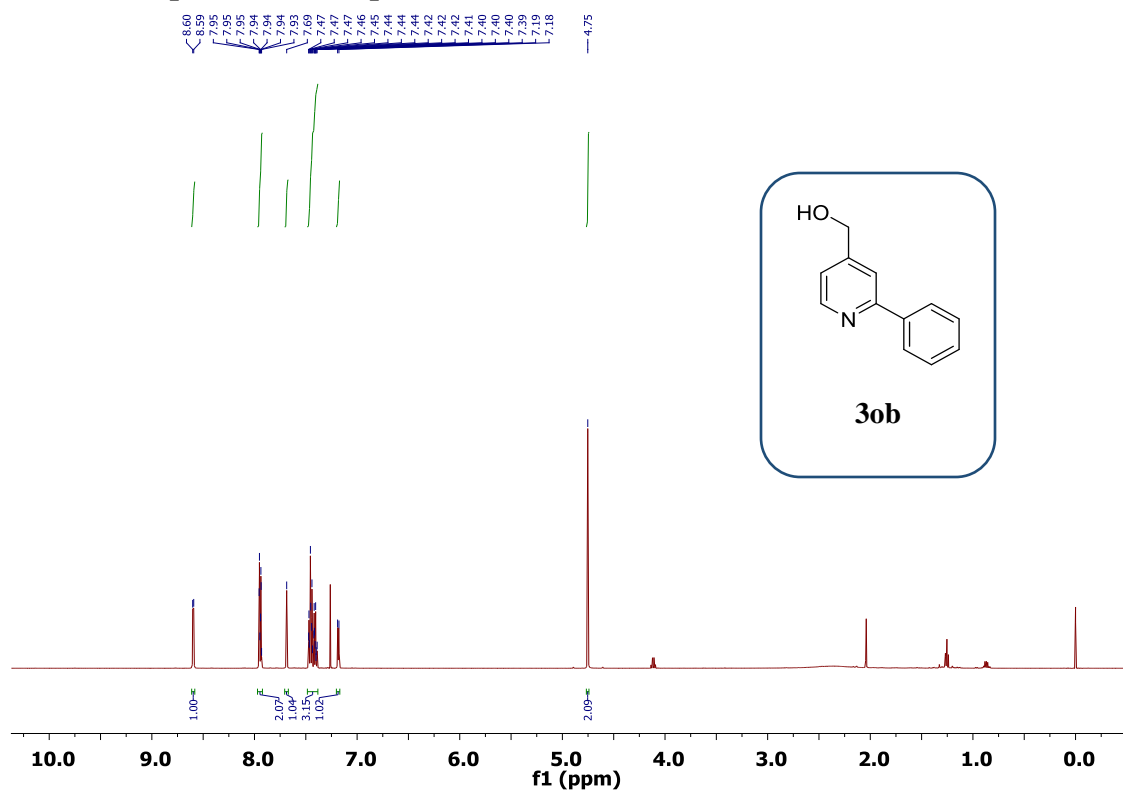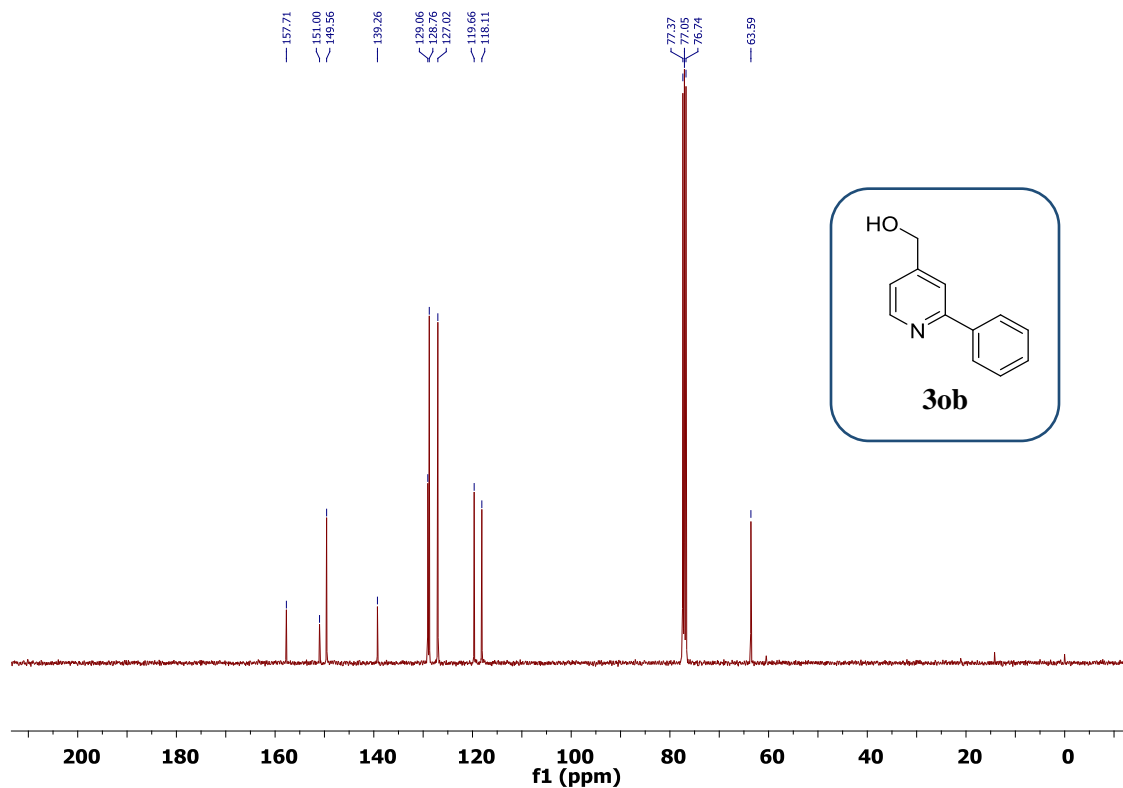

# $^1\text{H}$ and $^{13}\text{C}$ spectra for compound 3p:

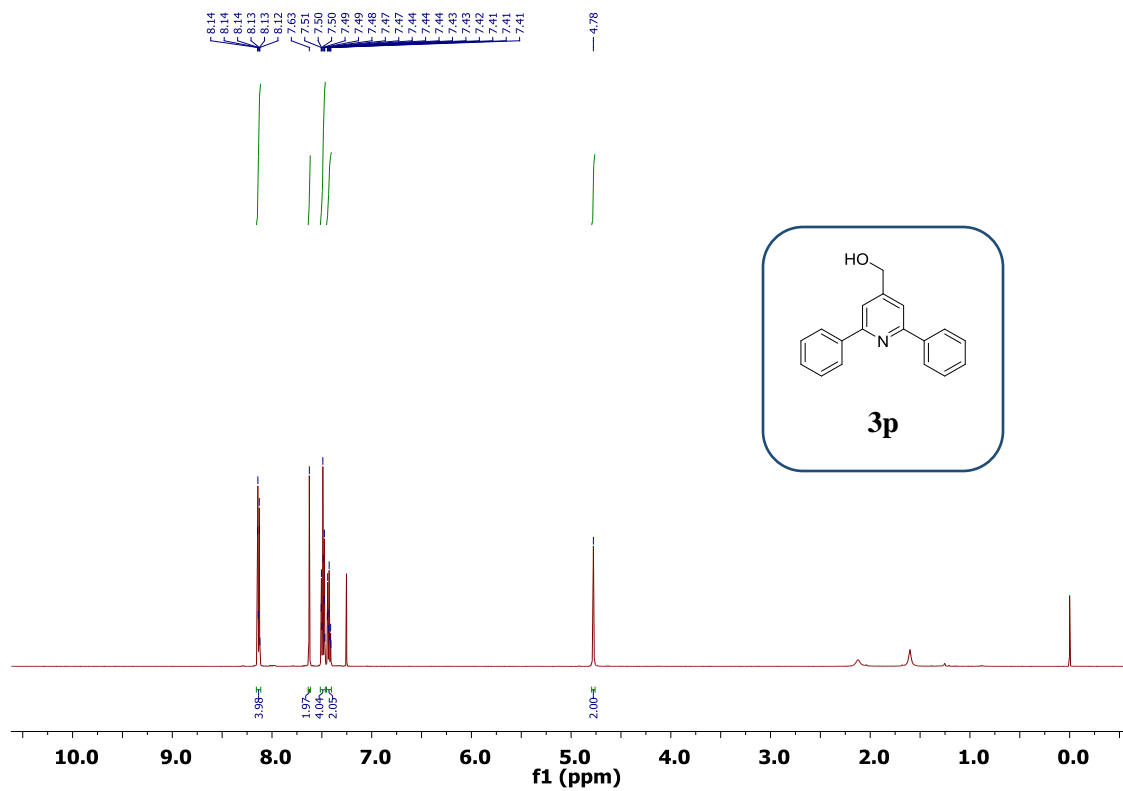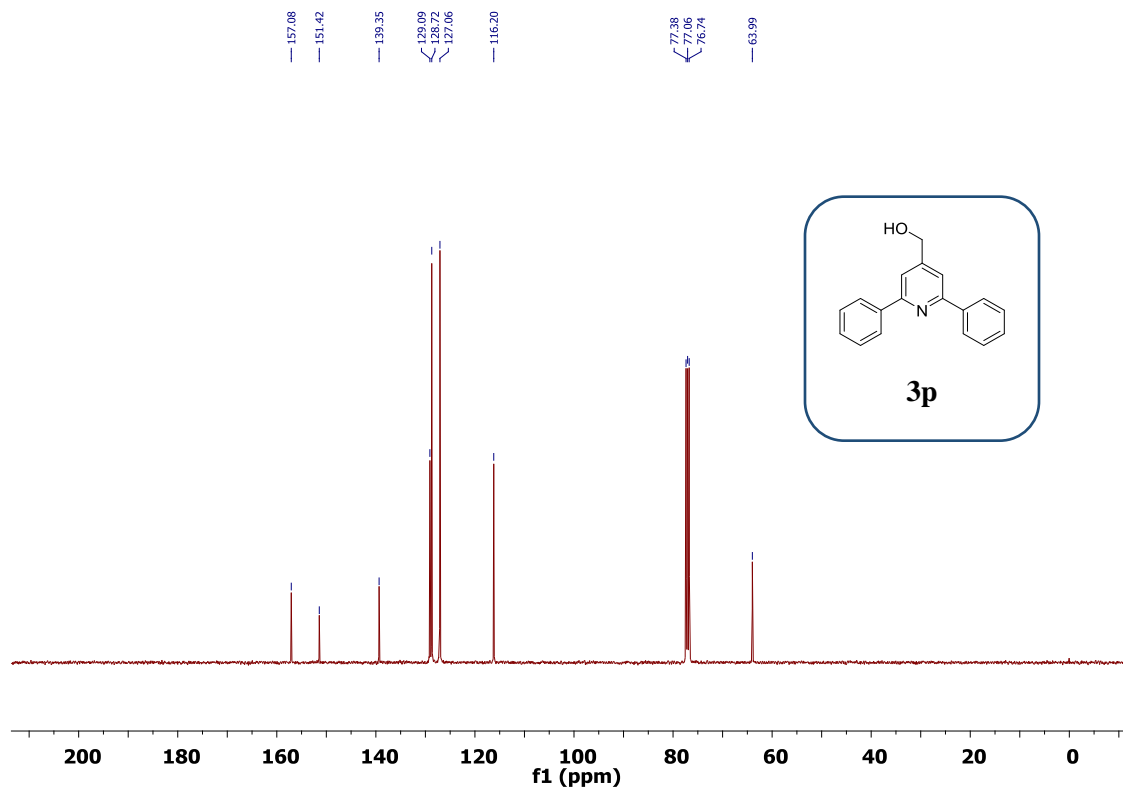

# $^1\text{H}$ and $^{13}\text{C}$ spectra for compound 4a:

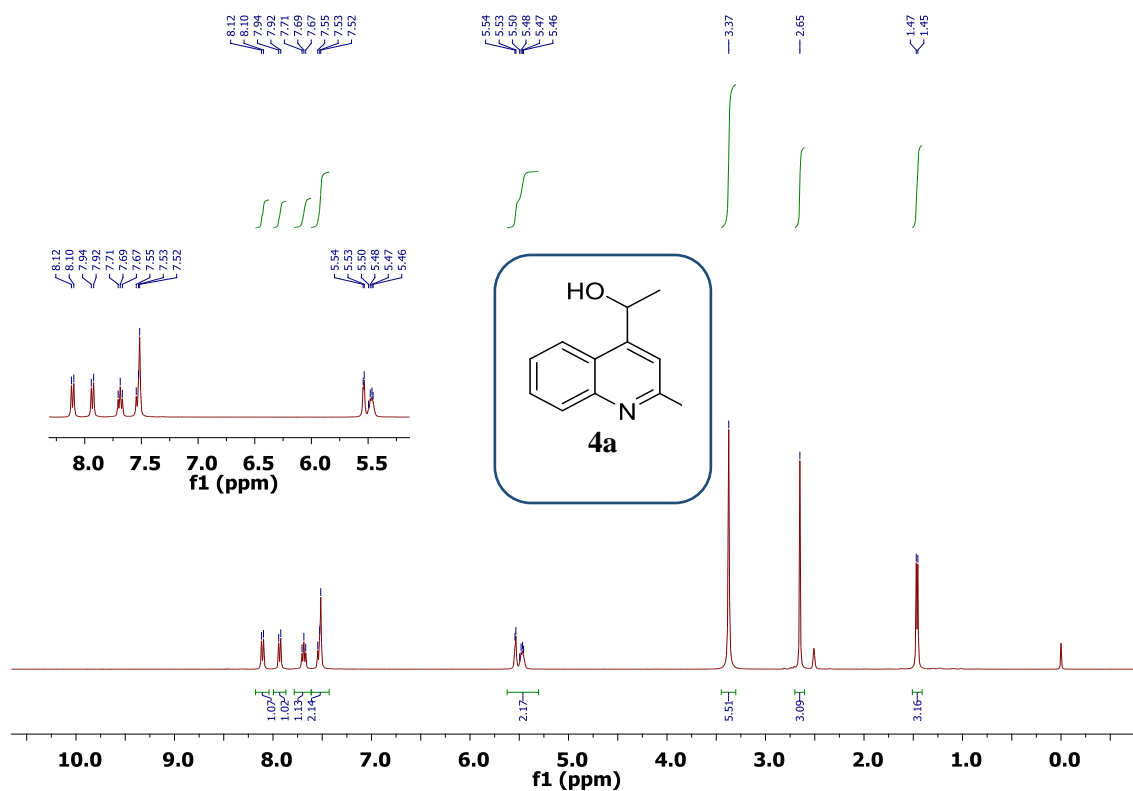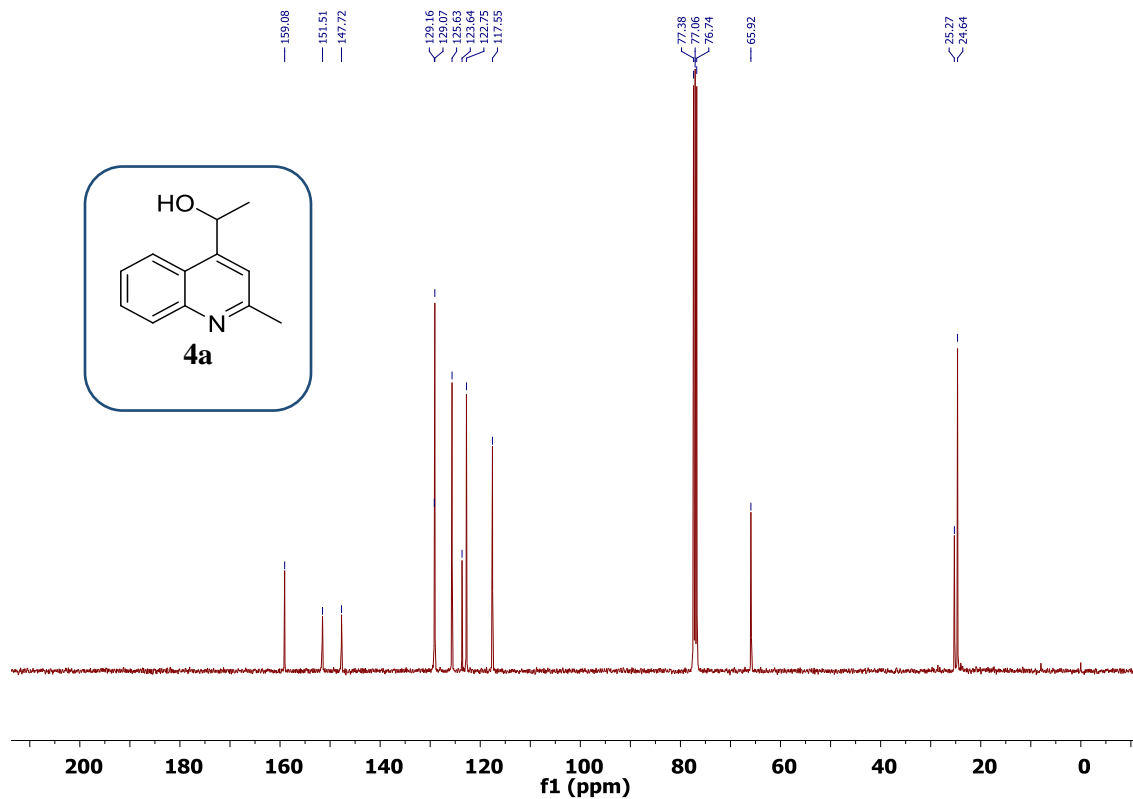

# $^1\text{H}$ and $^{13}\text{C}$ spectra for compound 4a':

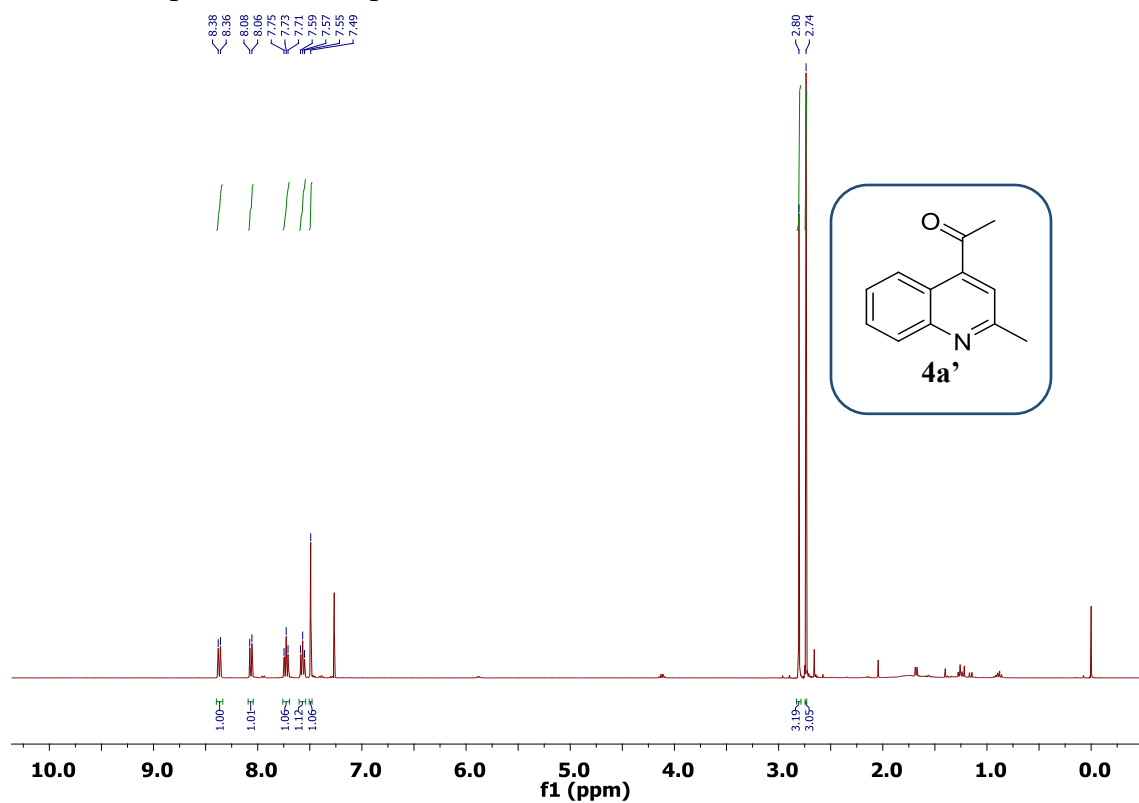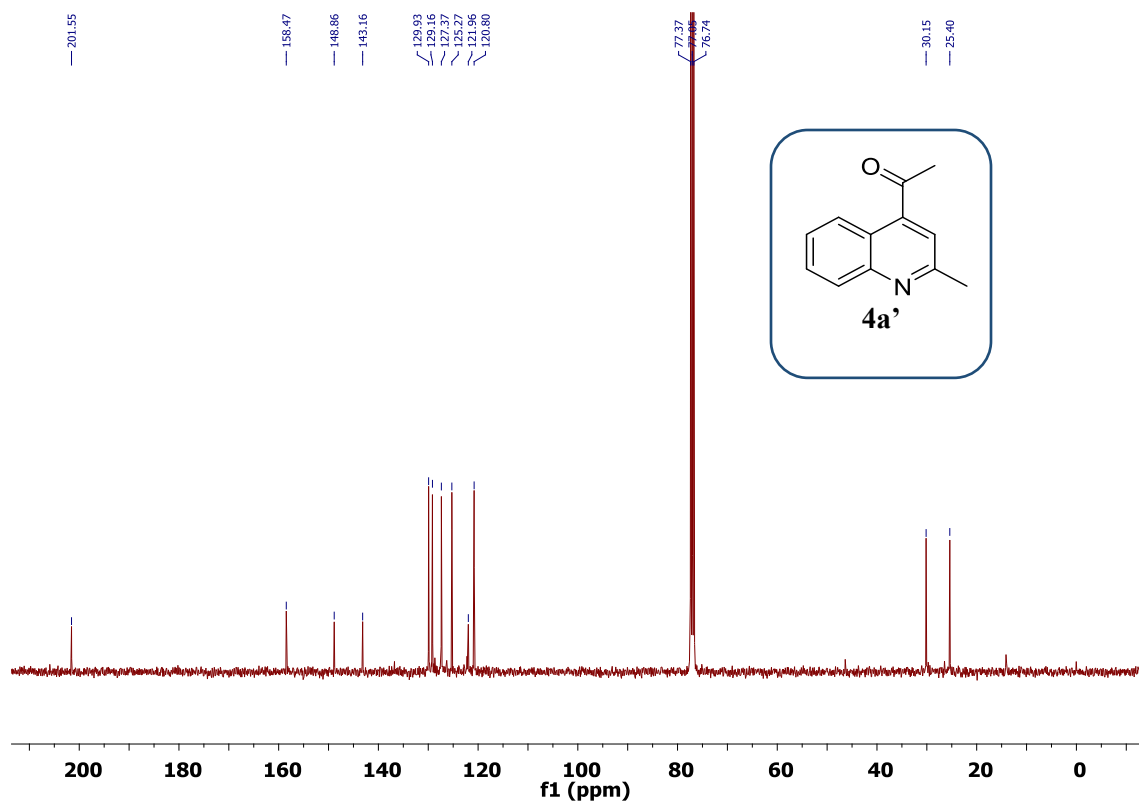

# $^1\text{H}$ and $^{13}\text{C}$ spectra for compound 4b:

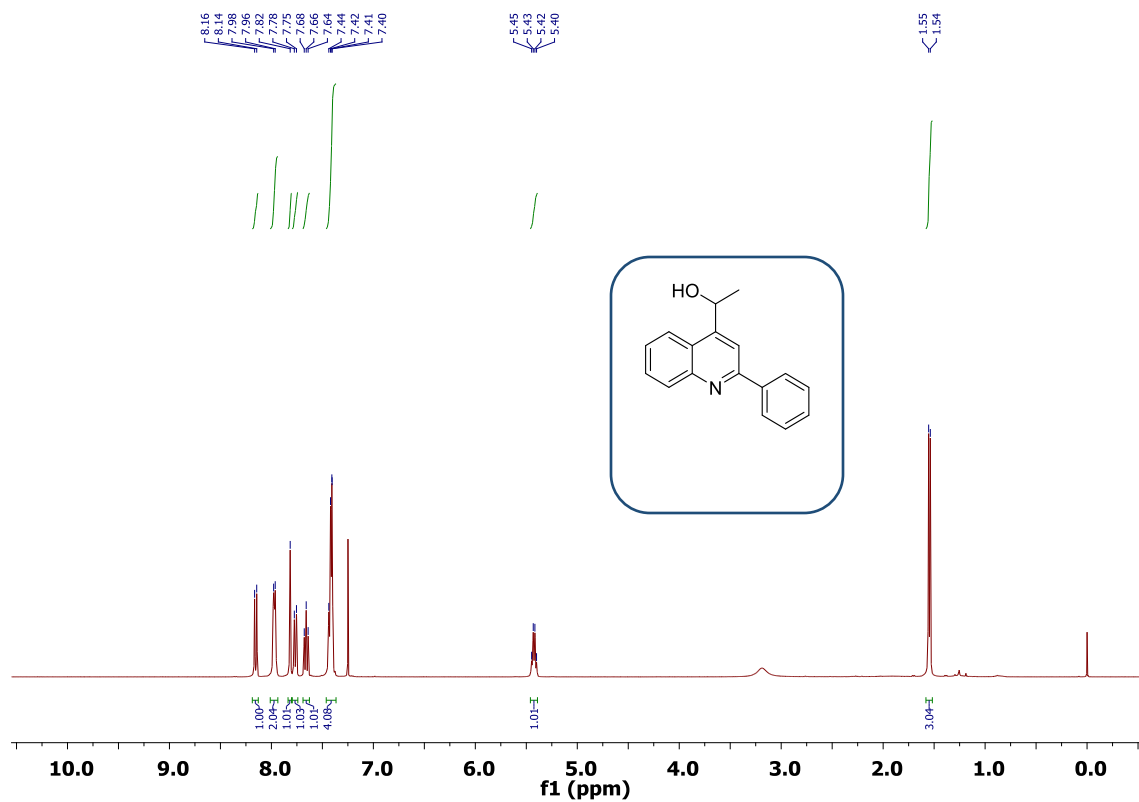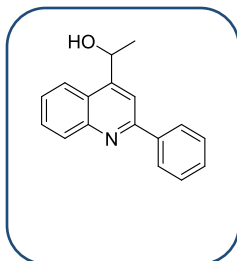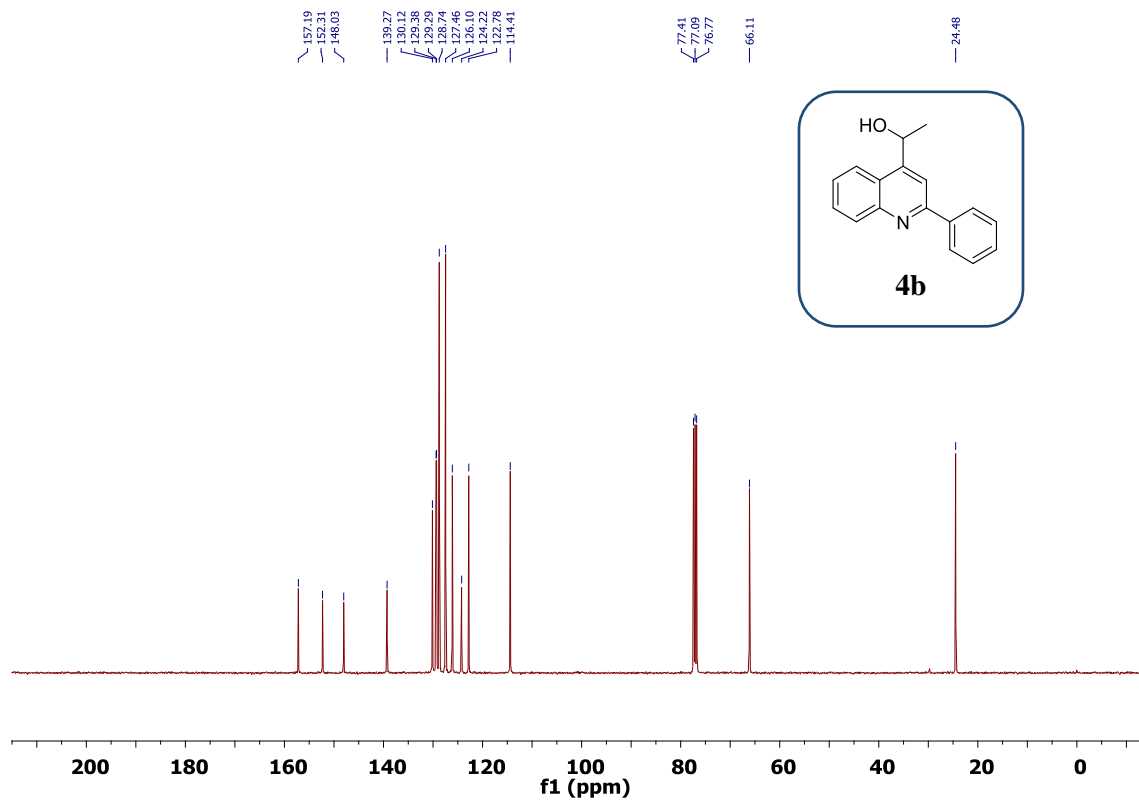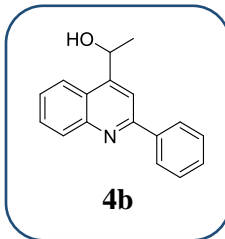

# $^1\text{H}$ and $^{13}\text{C}$ spectra for compound 4c:

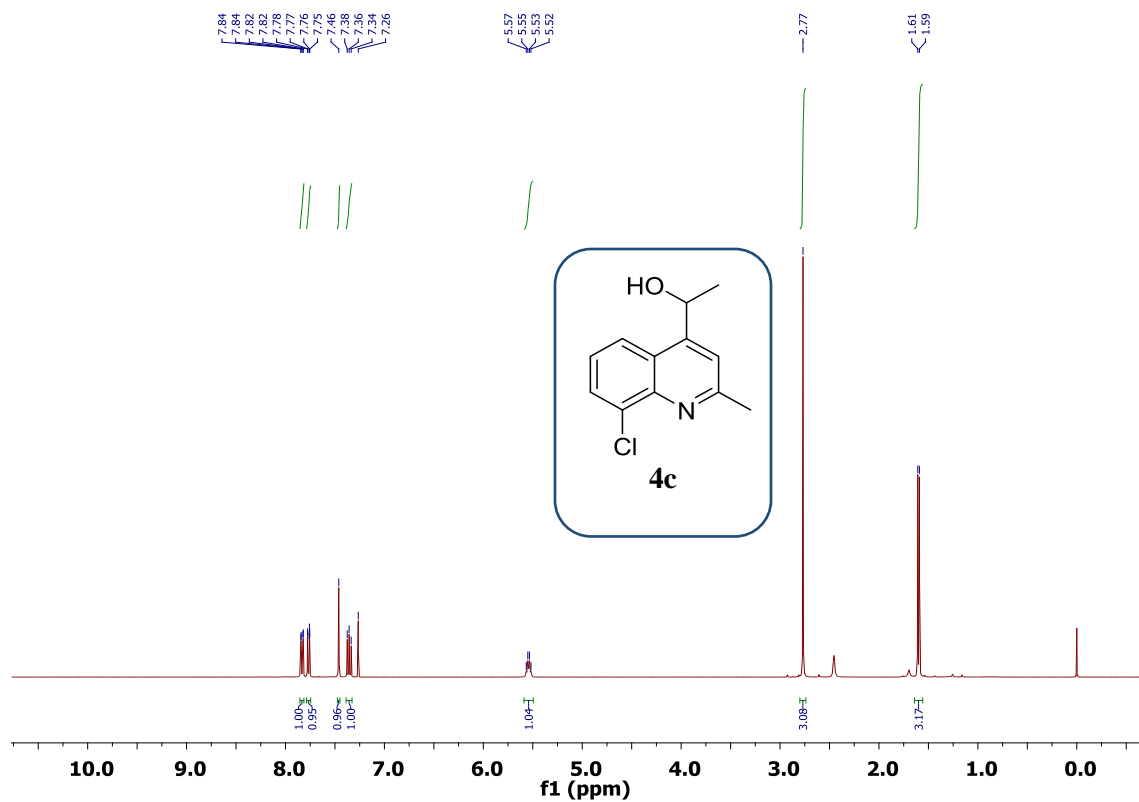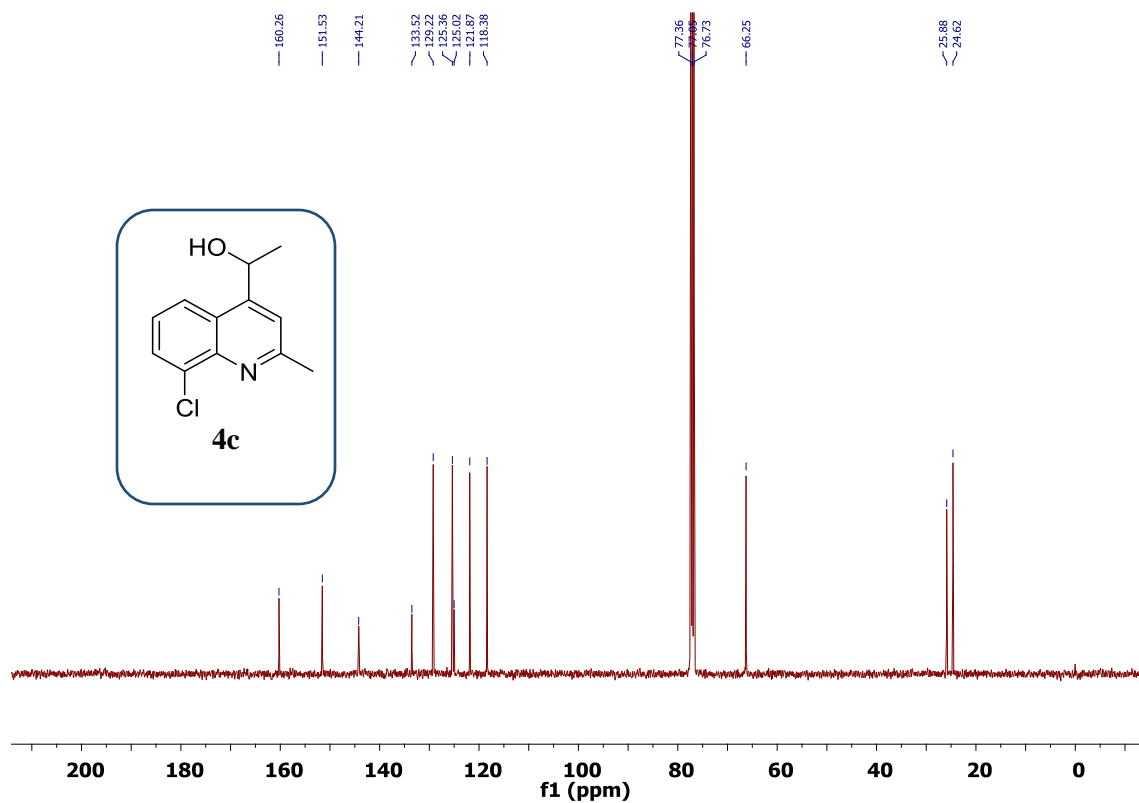

**$^1\text{H}$  and  $^{13}\text{C}$  spectra for compound 4d:**

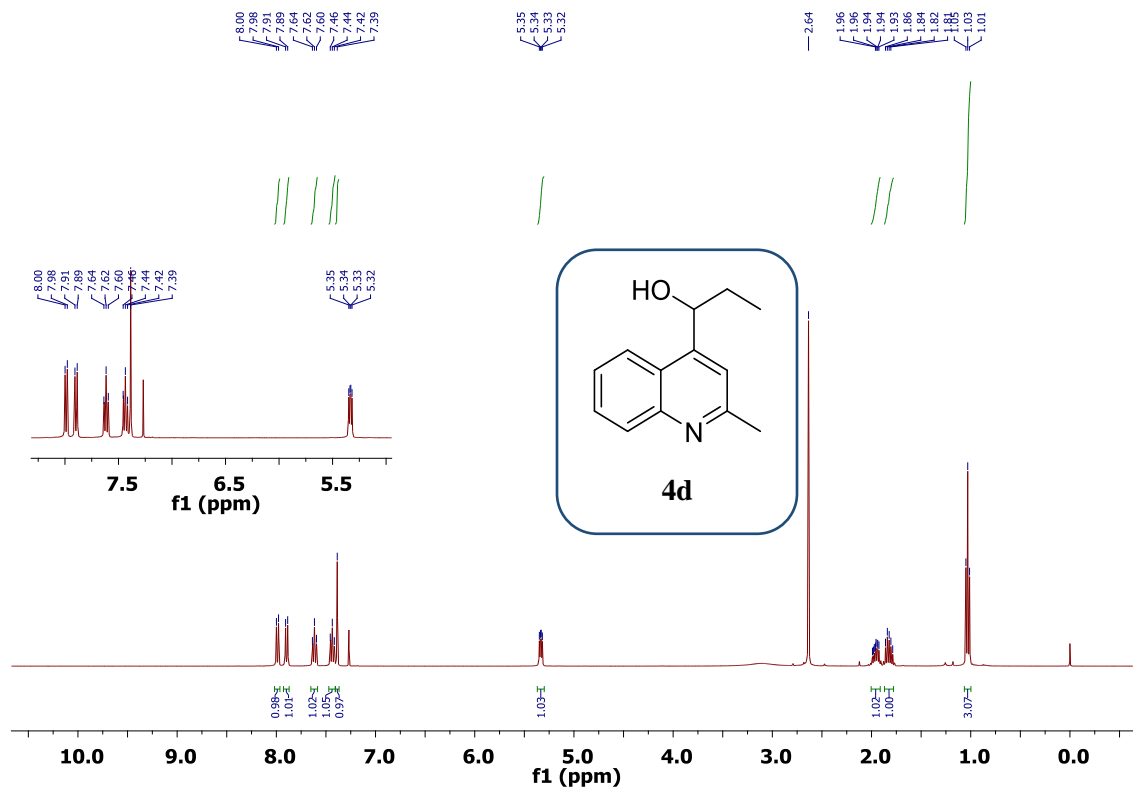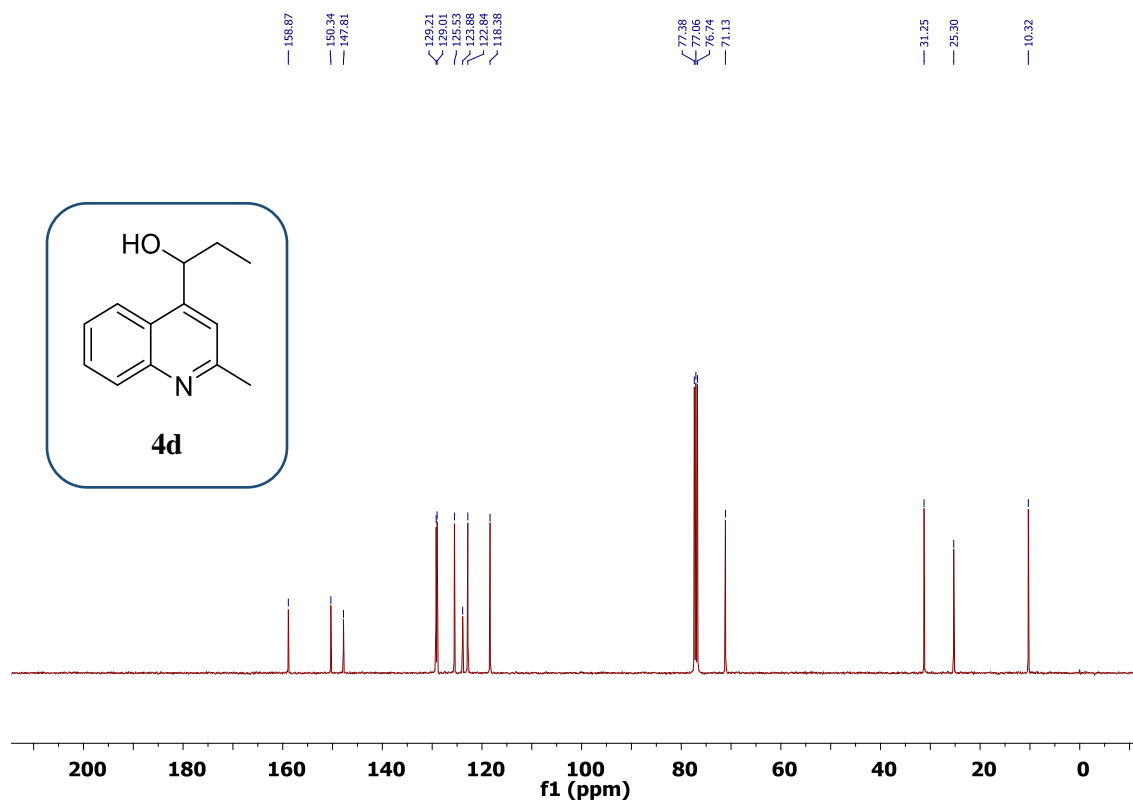

$^1\text{H}$ ,  $^{13}\text{C}$  and  $^{19}\text{F}$  Spectra for compound **4e**:

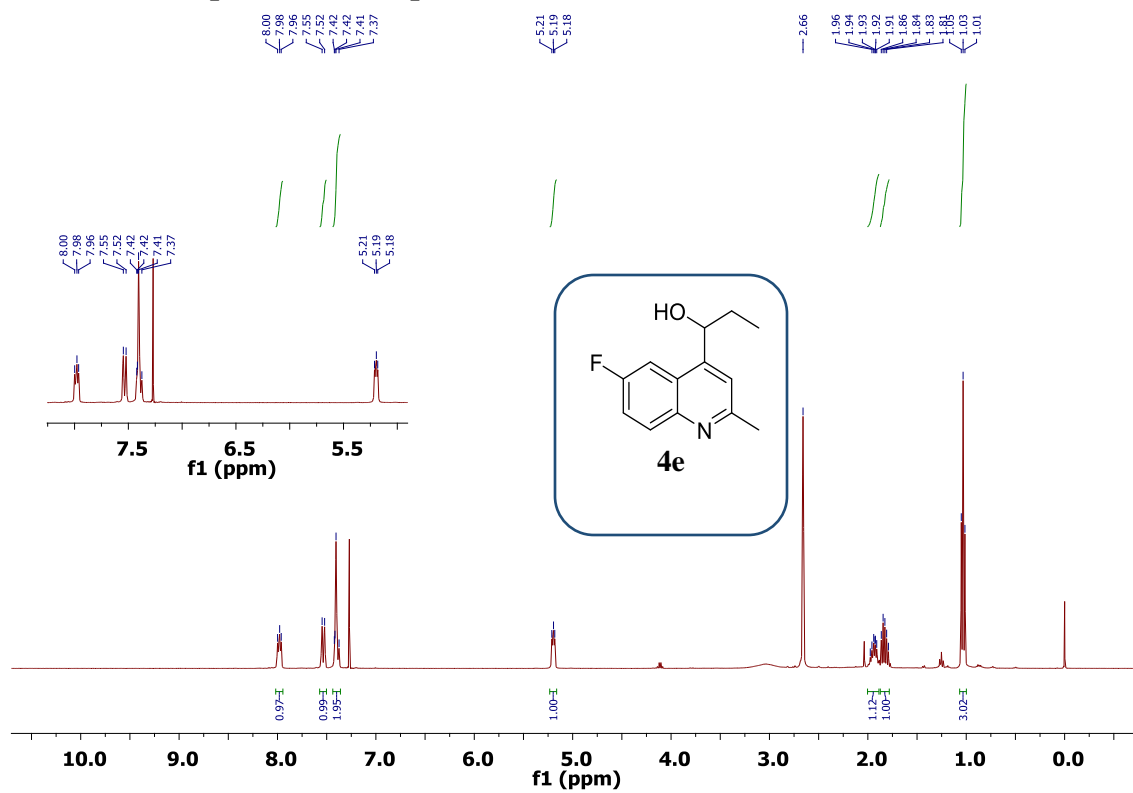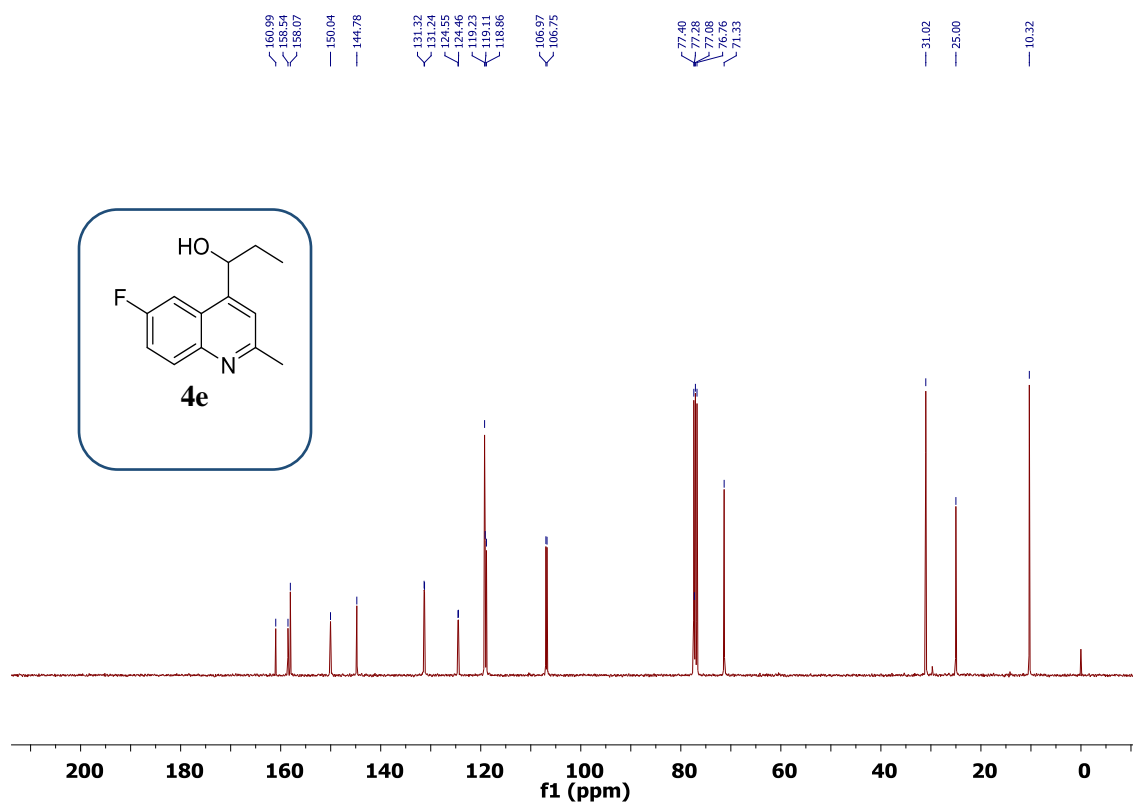



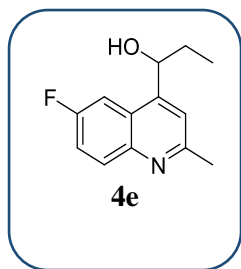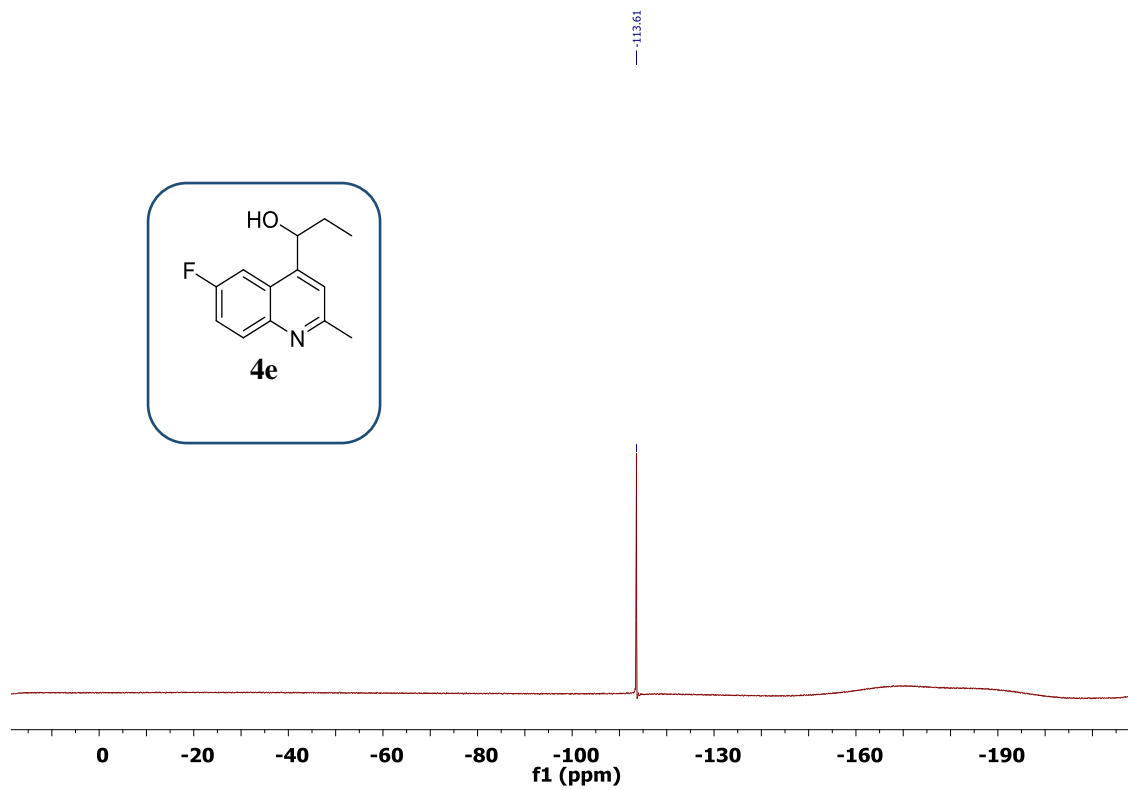

$^1\text{H}$  and  $^{13}\text{C}$  spectra for compound **4f**:

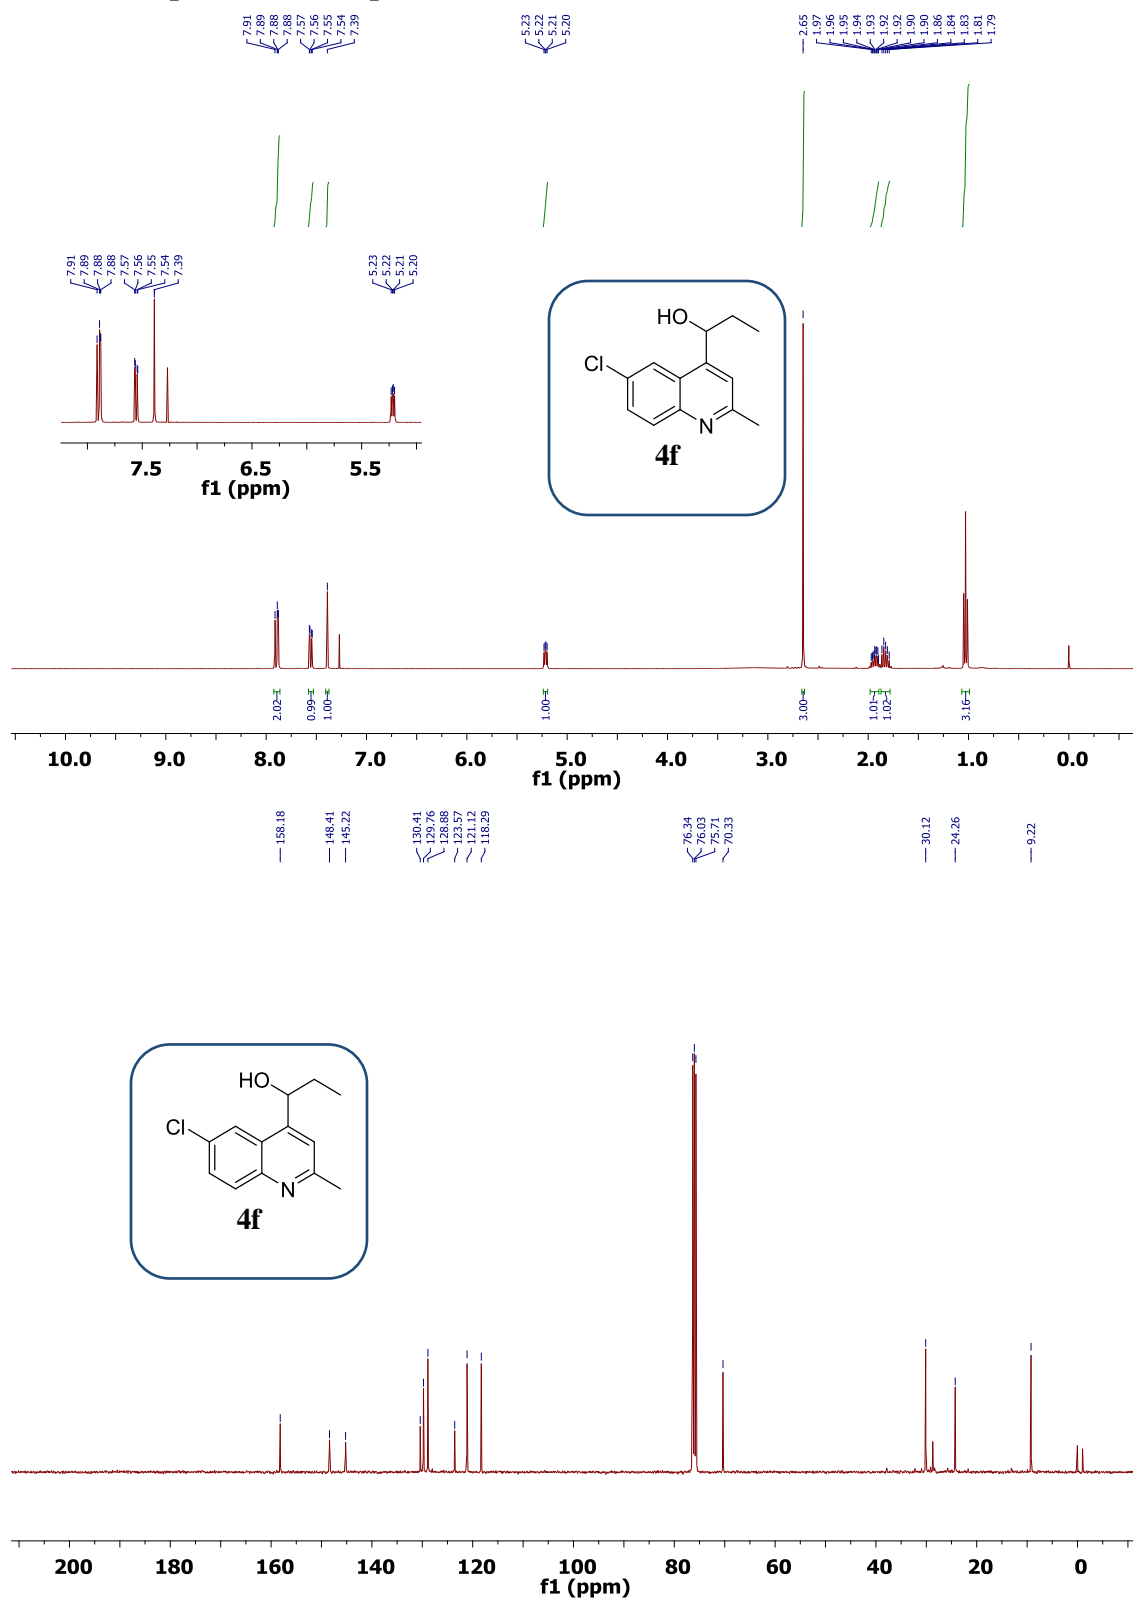

$^1\text{H}$  and  $^{13}\text{C}$  spectra for compound 4g:

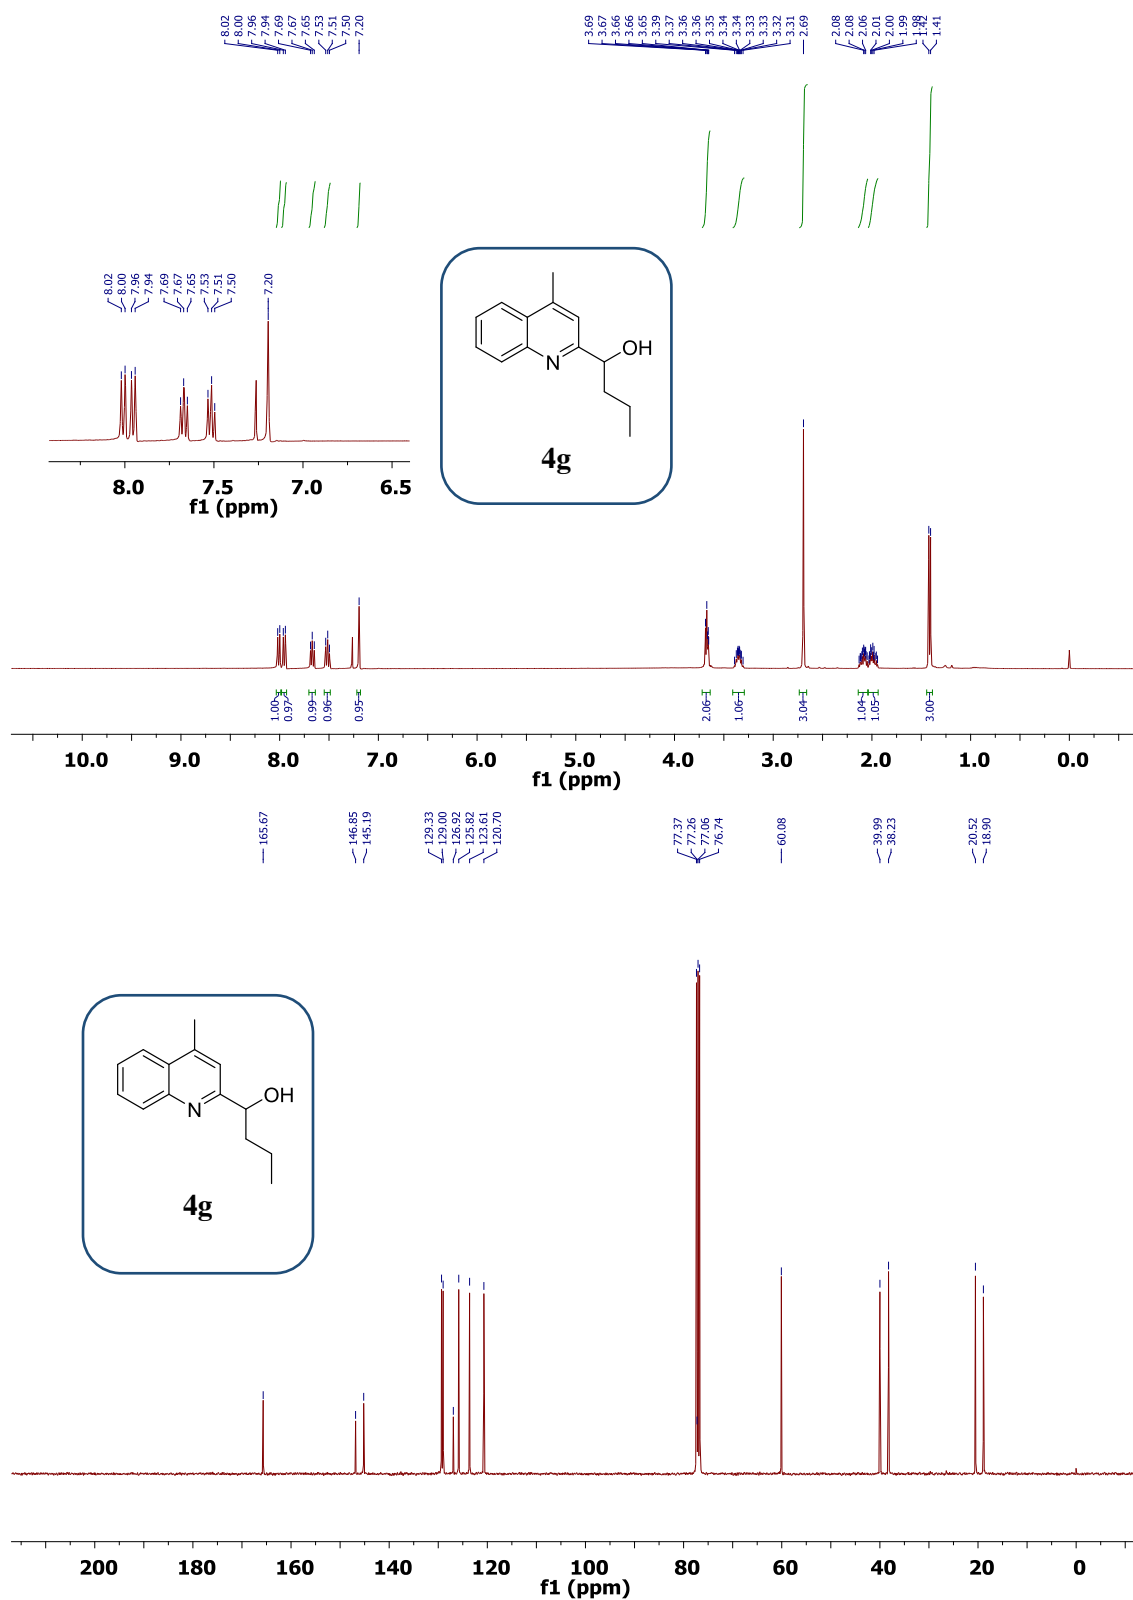

**$^1\text{H}$  and  $^{13}\text{C}$  spectra for compound 4h:**

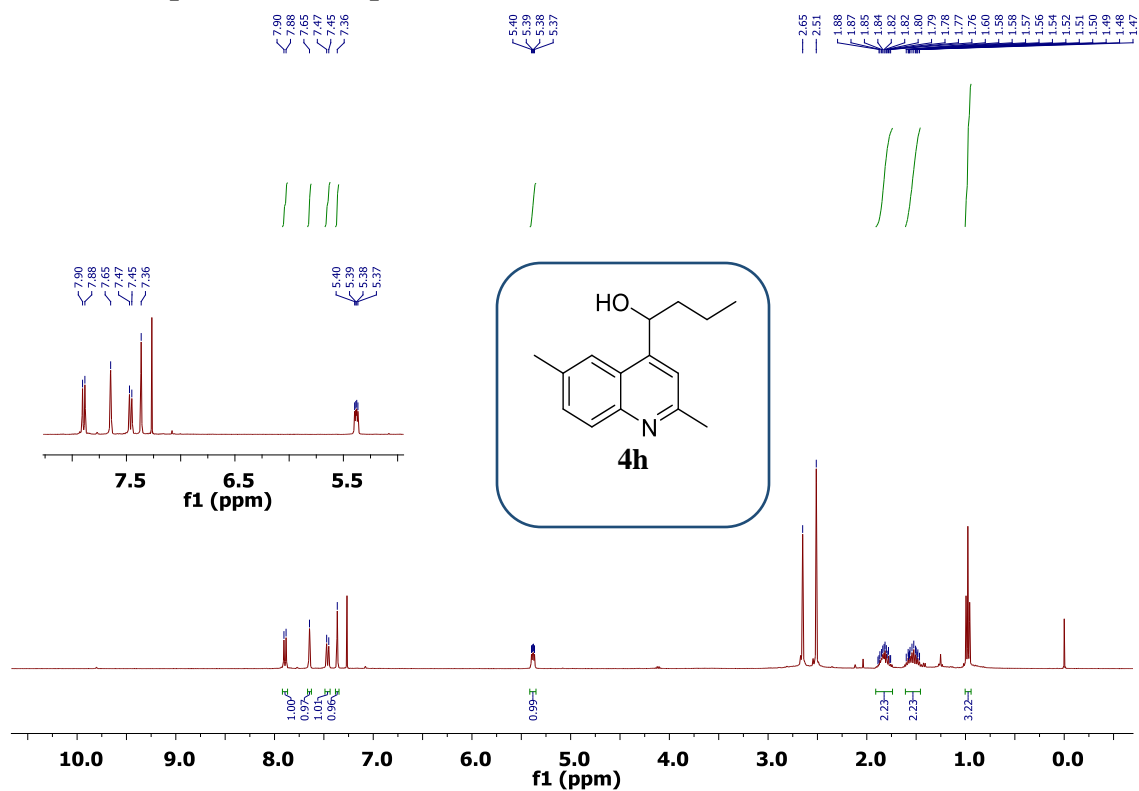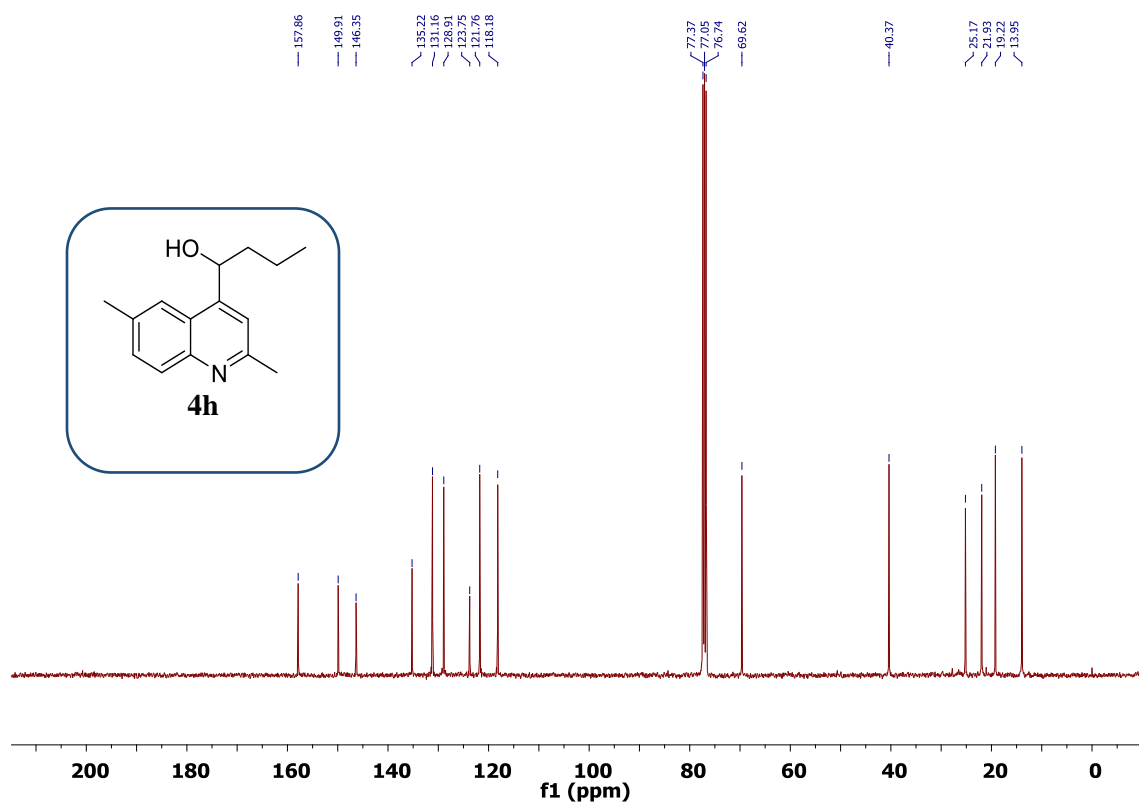

# $^1\text{H}$ and $^{13}\text{C}$ spectra for compound 4i:

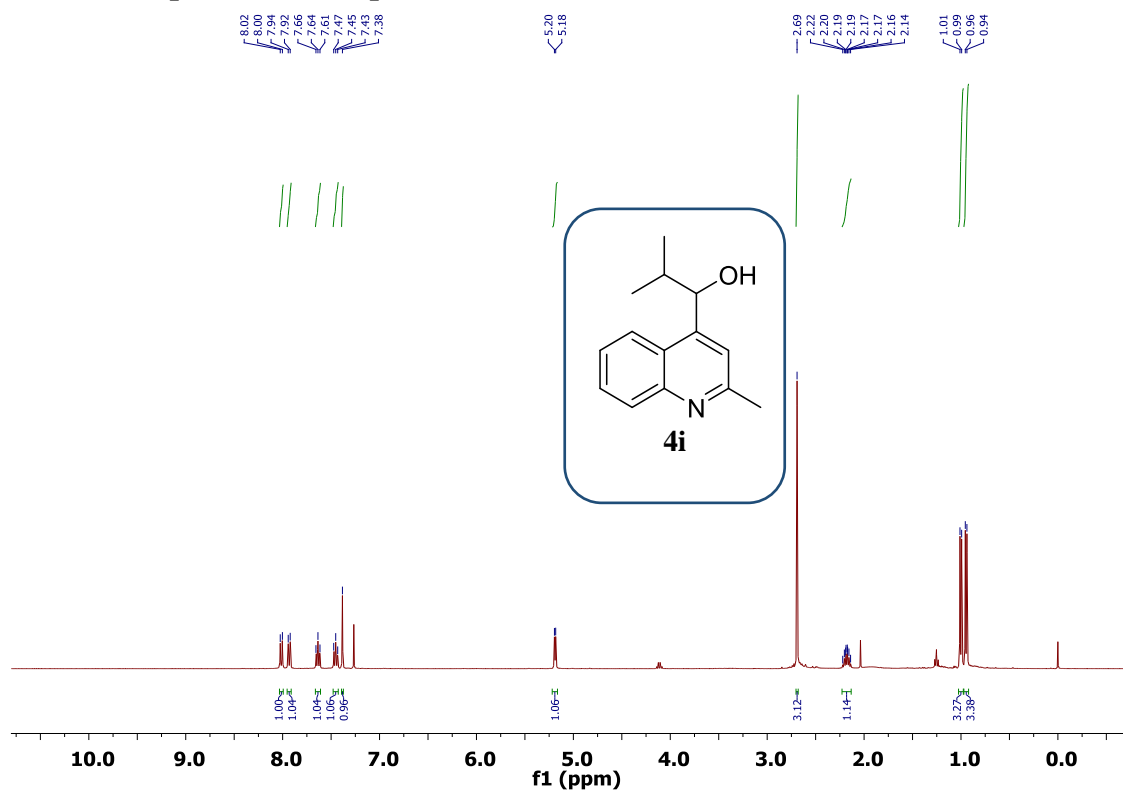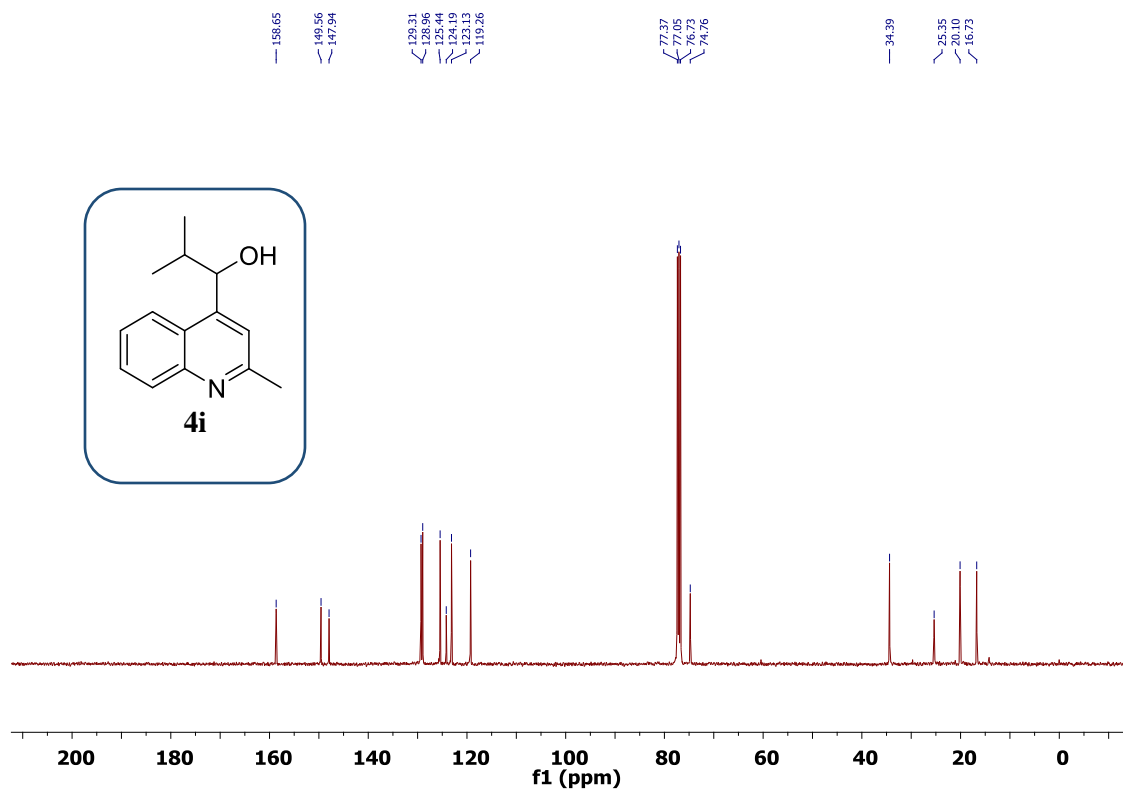

$^1\text{H}$  and  $^{13}\text{C}$  spectra for compound **4j**:

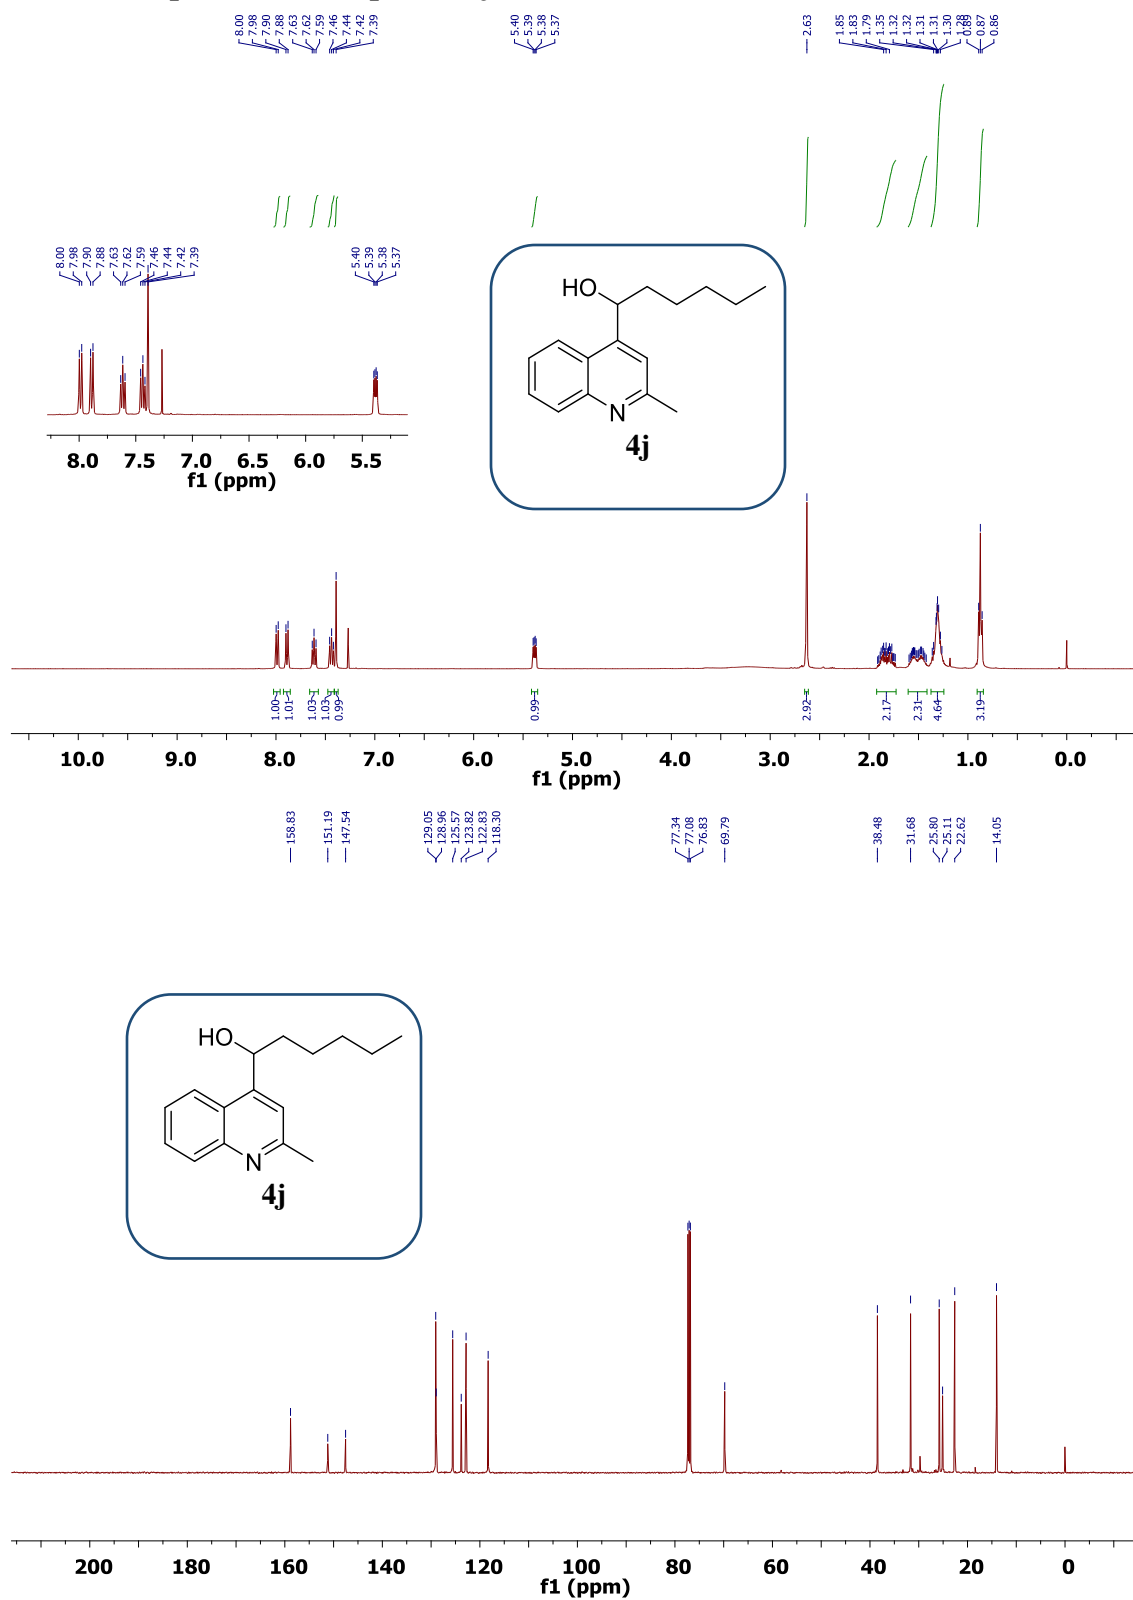

# $^1\text{H}$ and $^{13}\text{C}$ spectra for compound 5a:

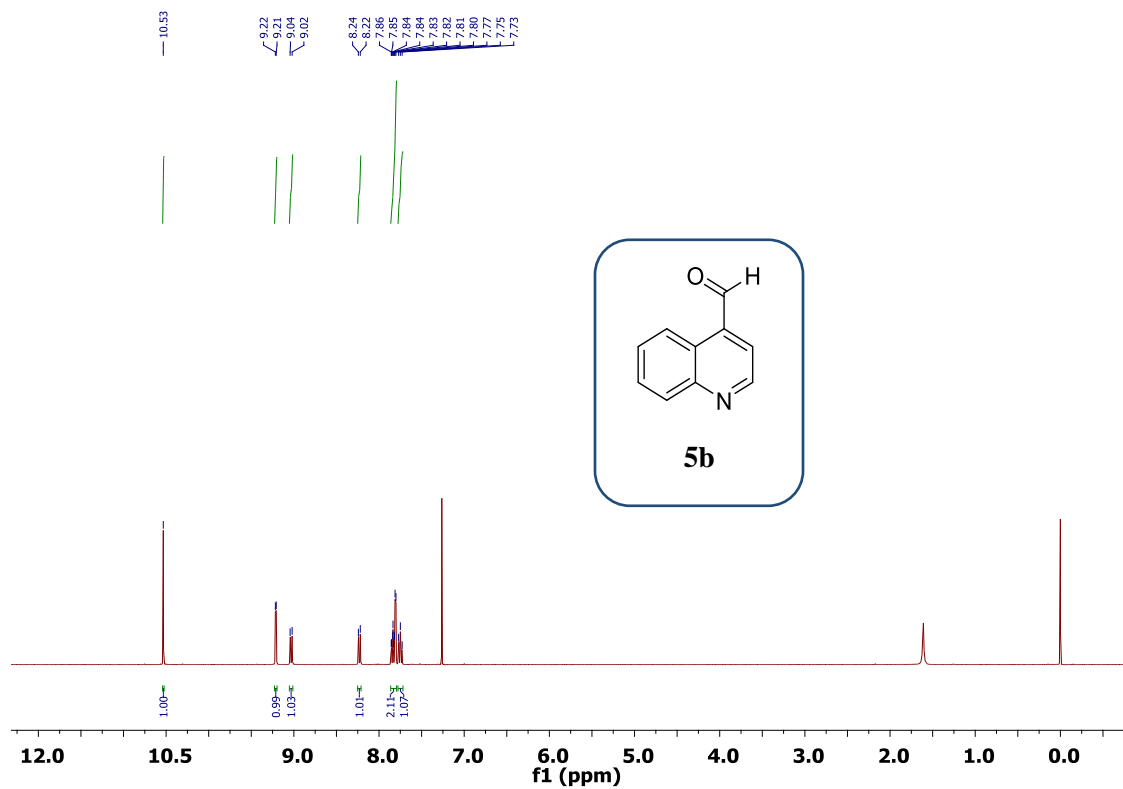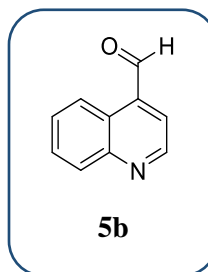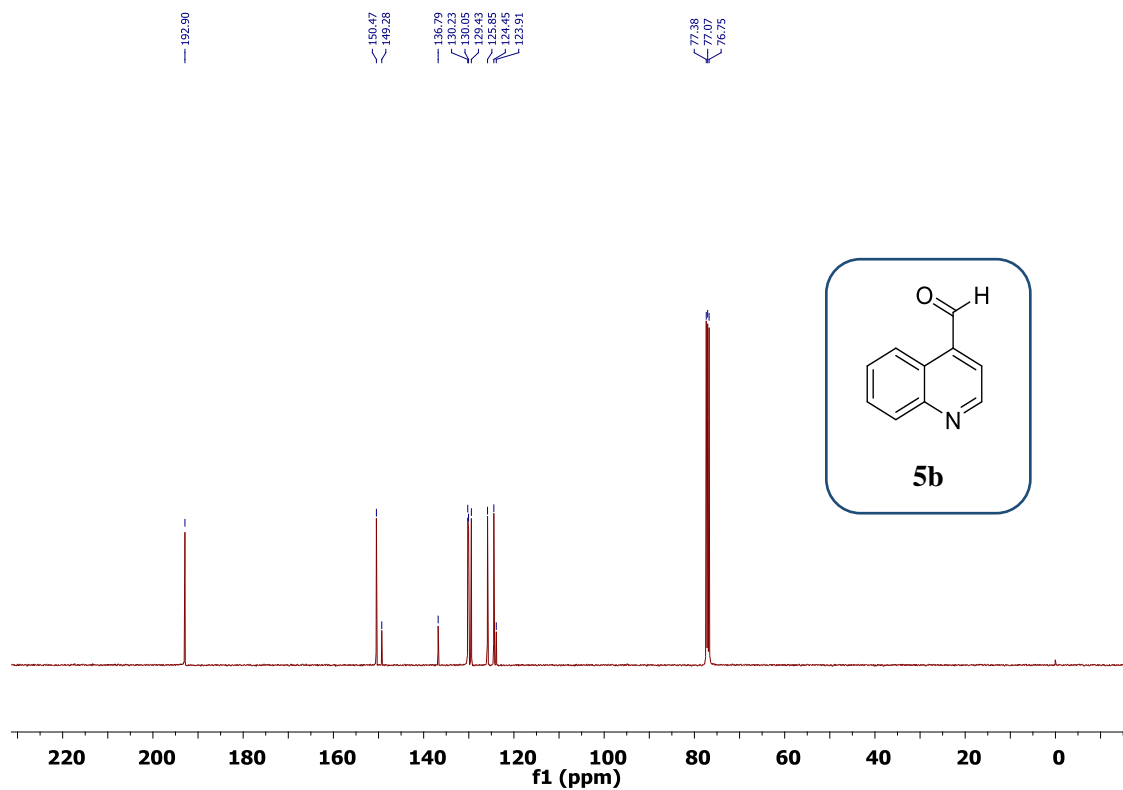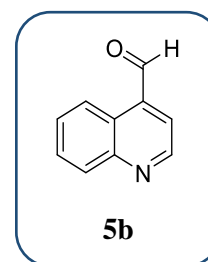

$^1\text{H}$  and  $^{13}\text{C}$  spectra for compound 5b:

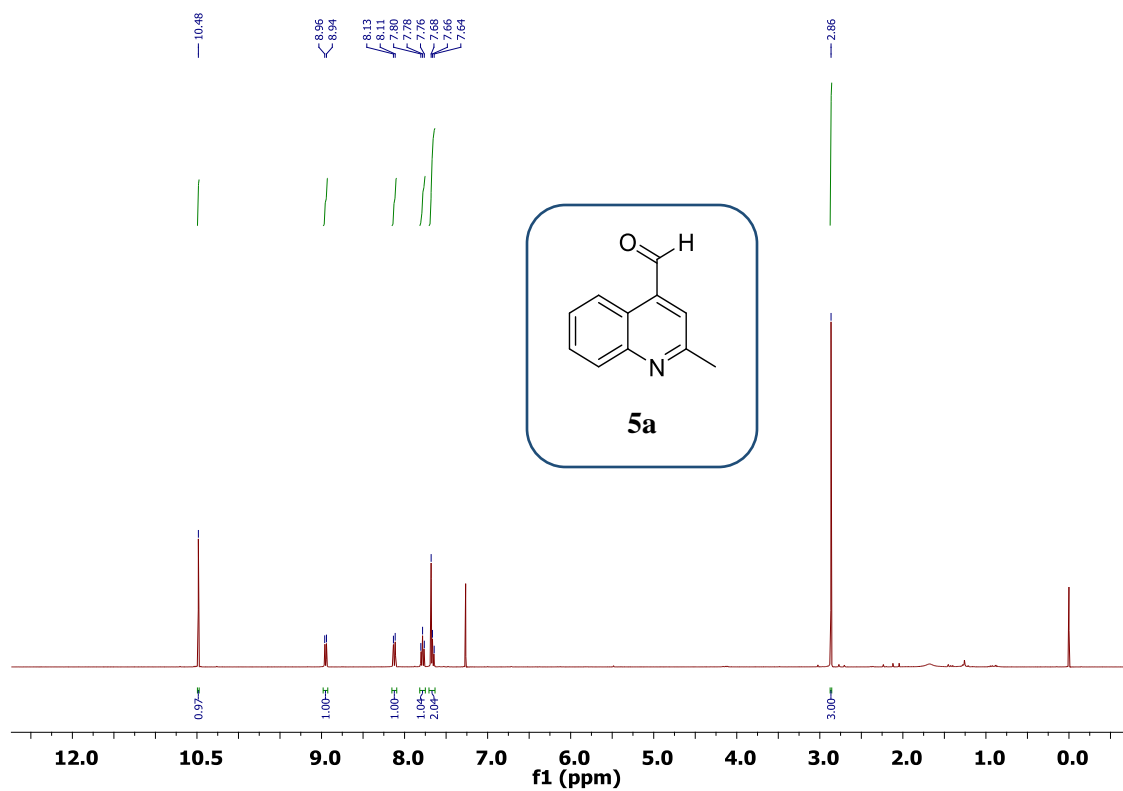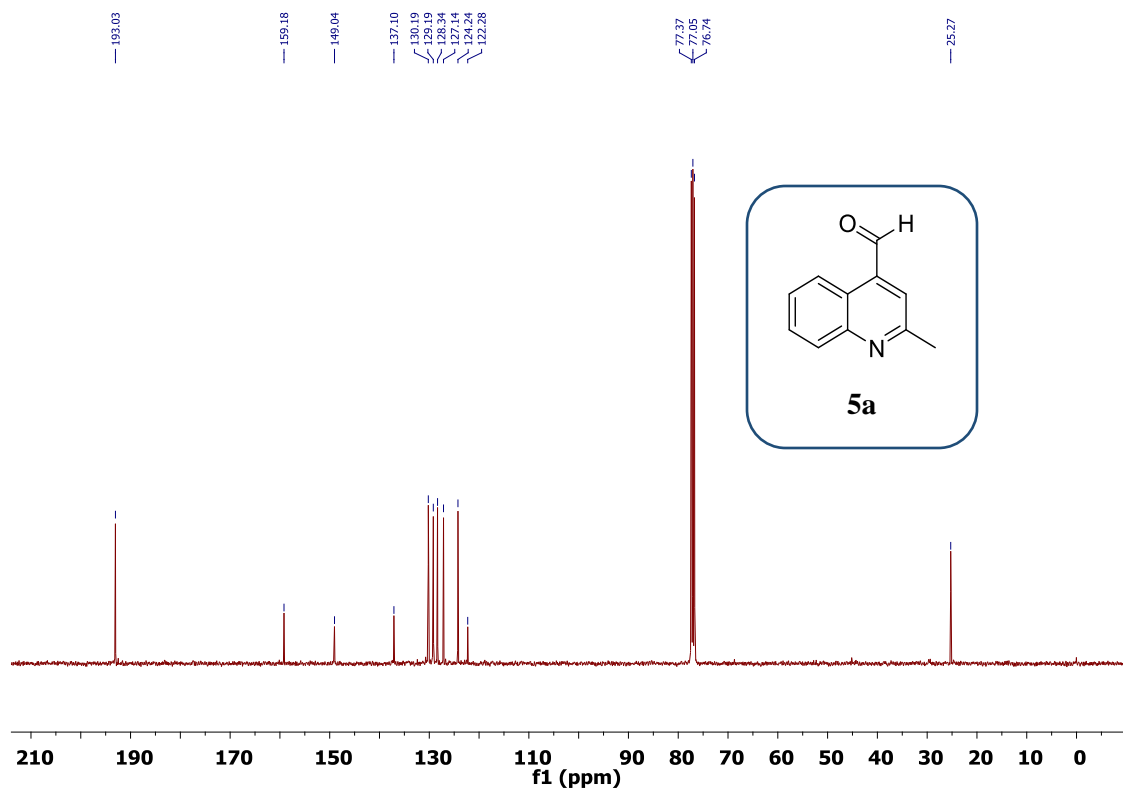



# $^1\text{H}$ and $^{13}\text{C}$ spectra for compound 5c:

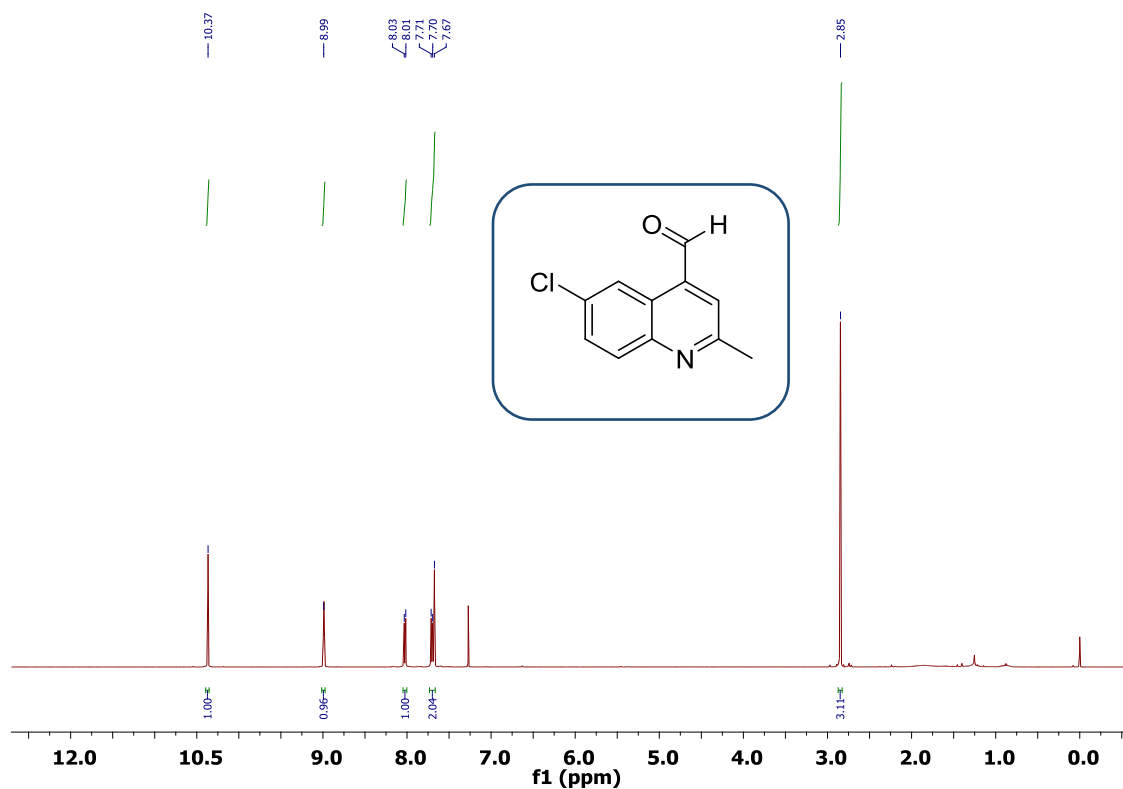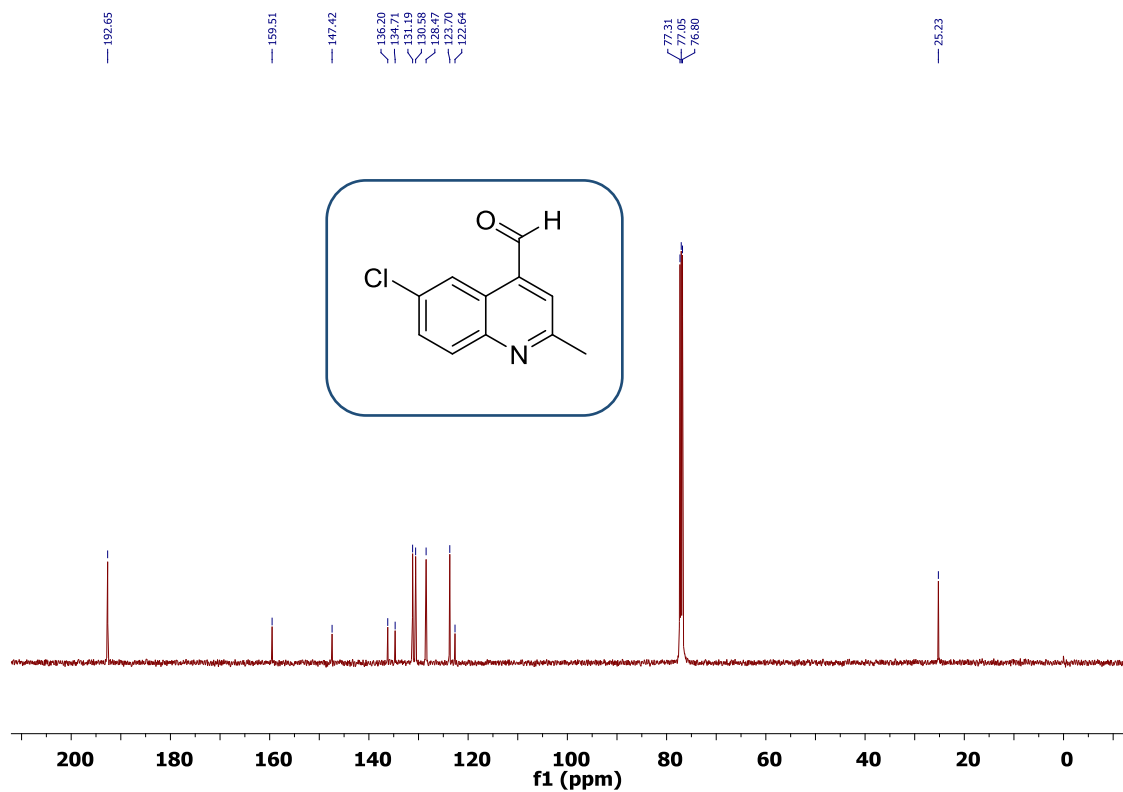

# $^1\text{H}$ and $^{13}\text{C}$ spectra for compound 5d:

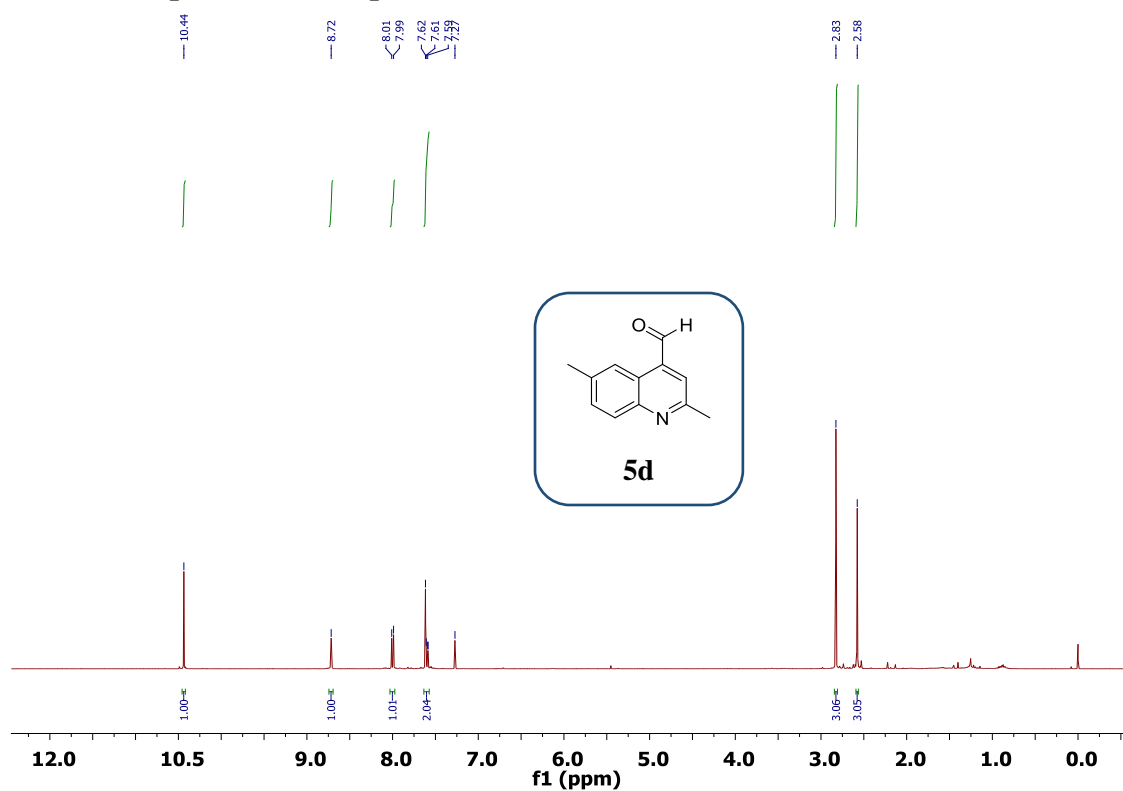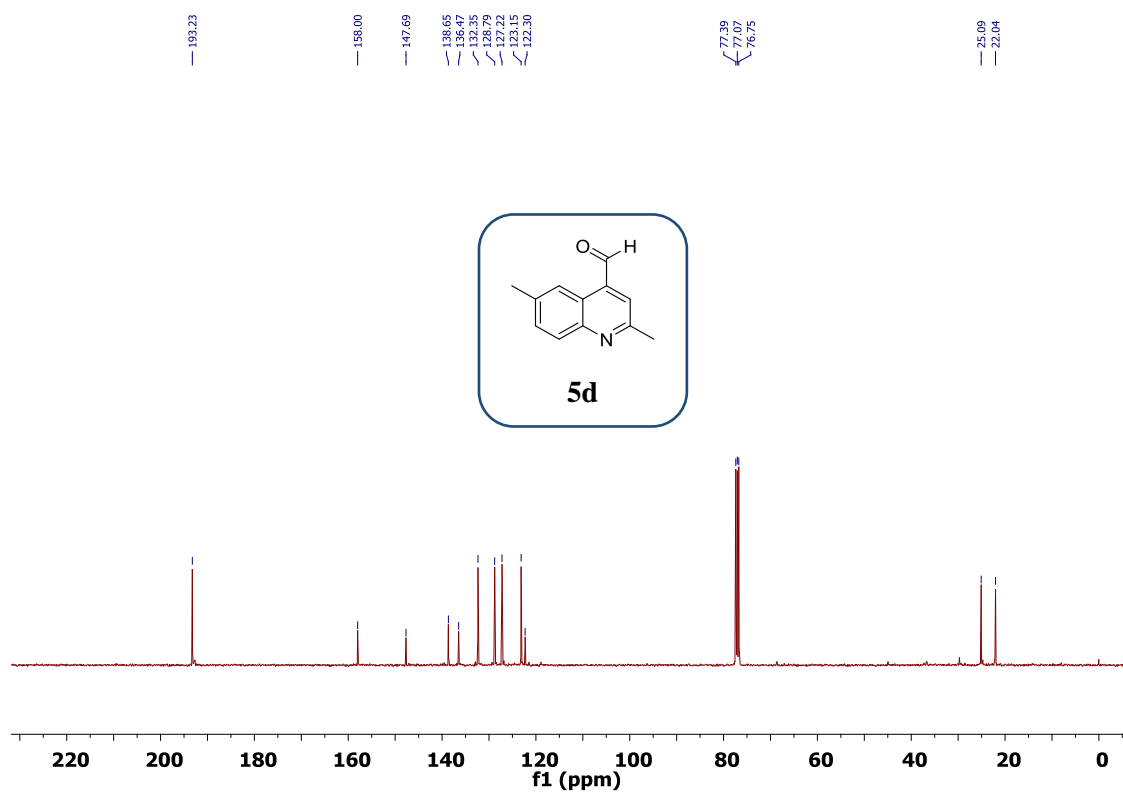

# $^1\text{H}$ and $^{13}\text{C}$ spectra for compound 7a:

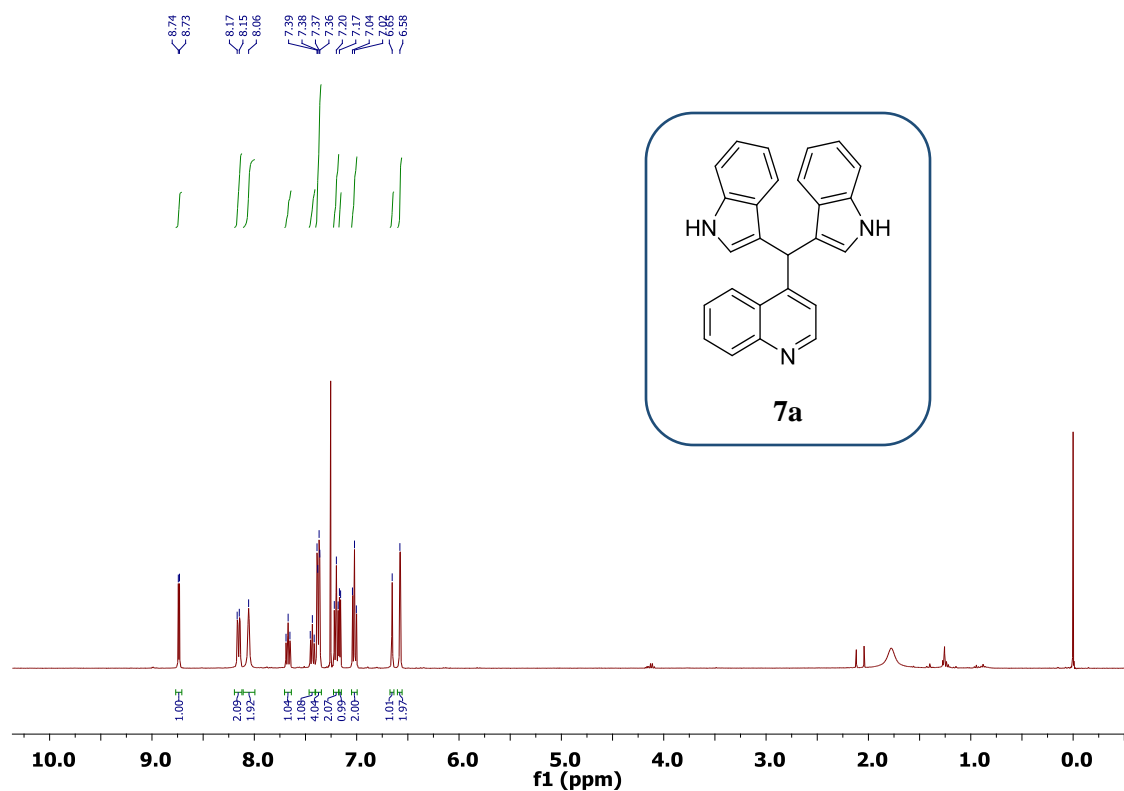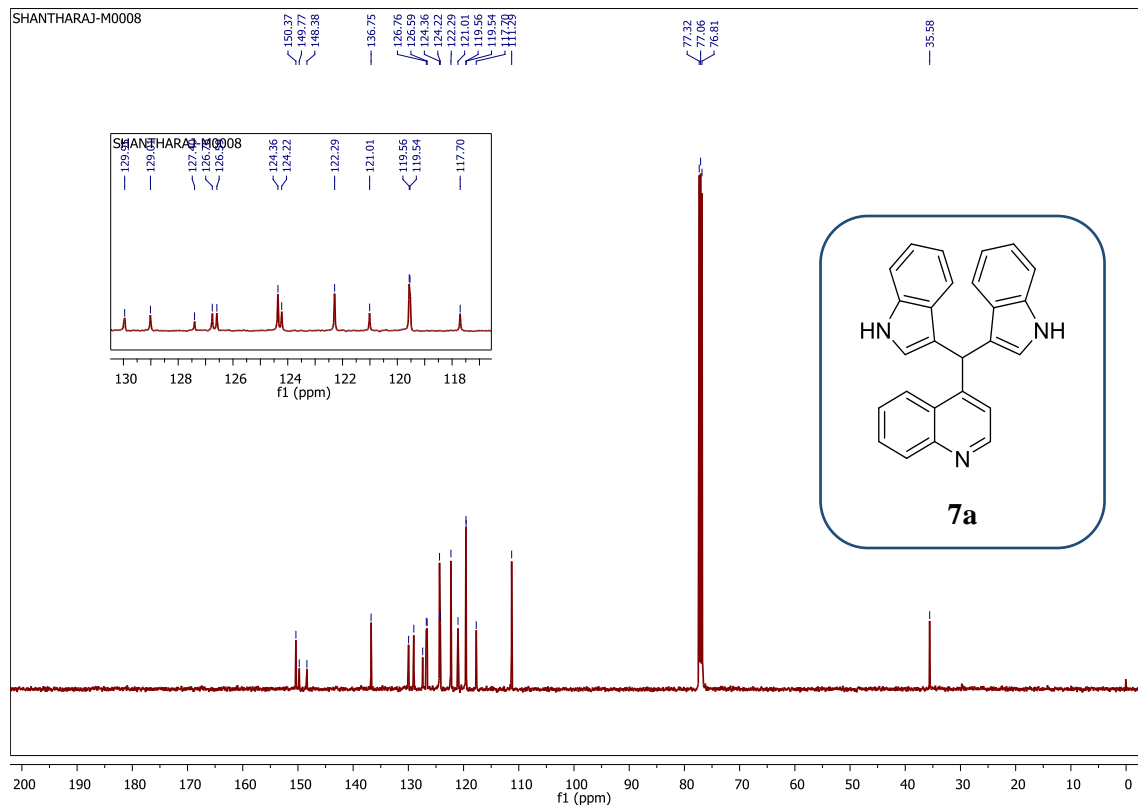

**$^1\text{H}$  and  $^{13}\text{C}$  spectra for compound 7b:**

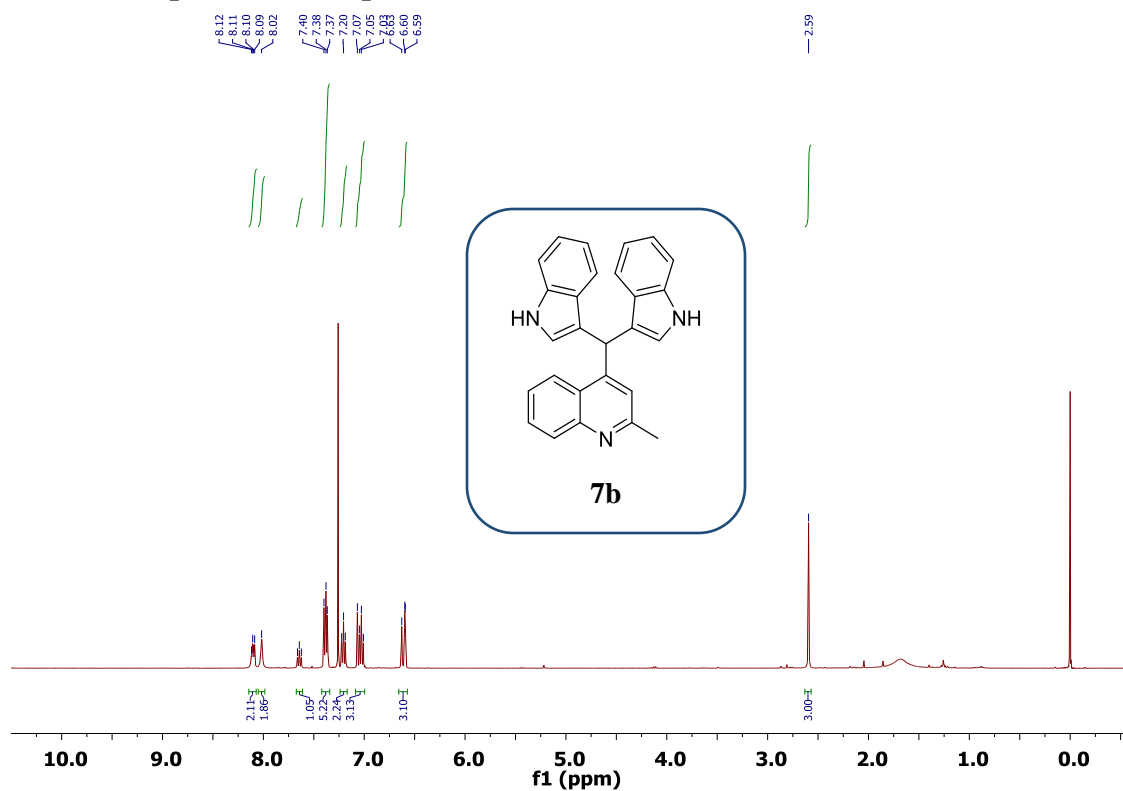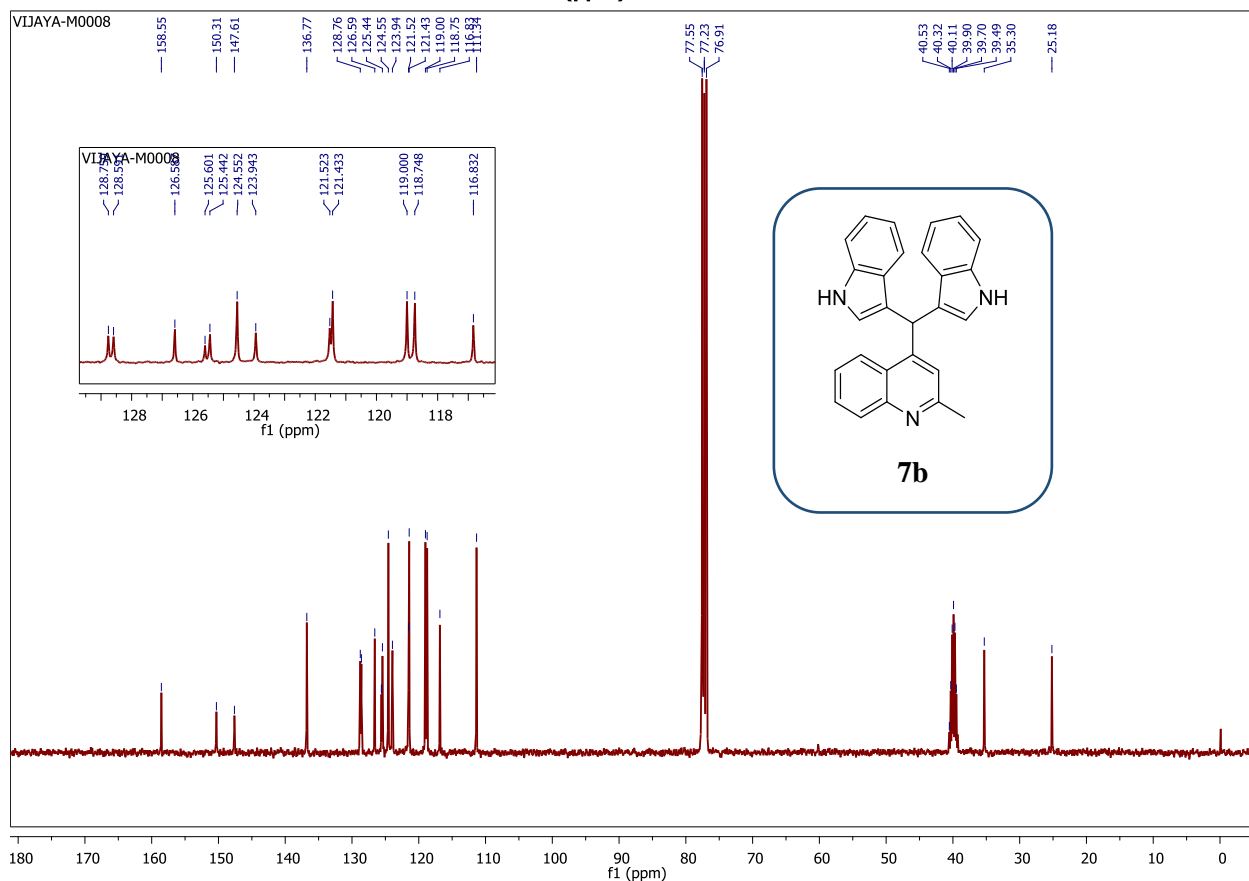

# $^1\text{H}$ and $^{13}\text{C}$ spectra for compound 7c:

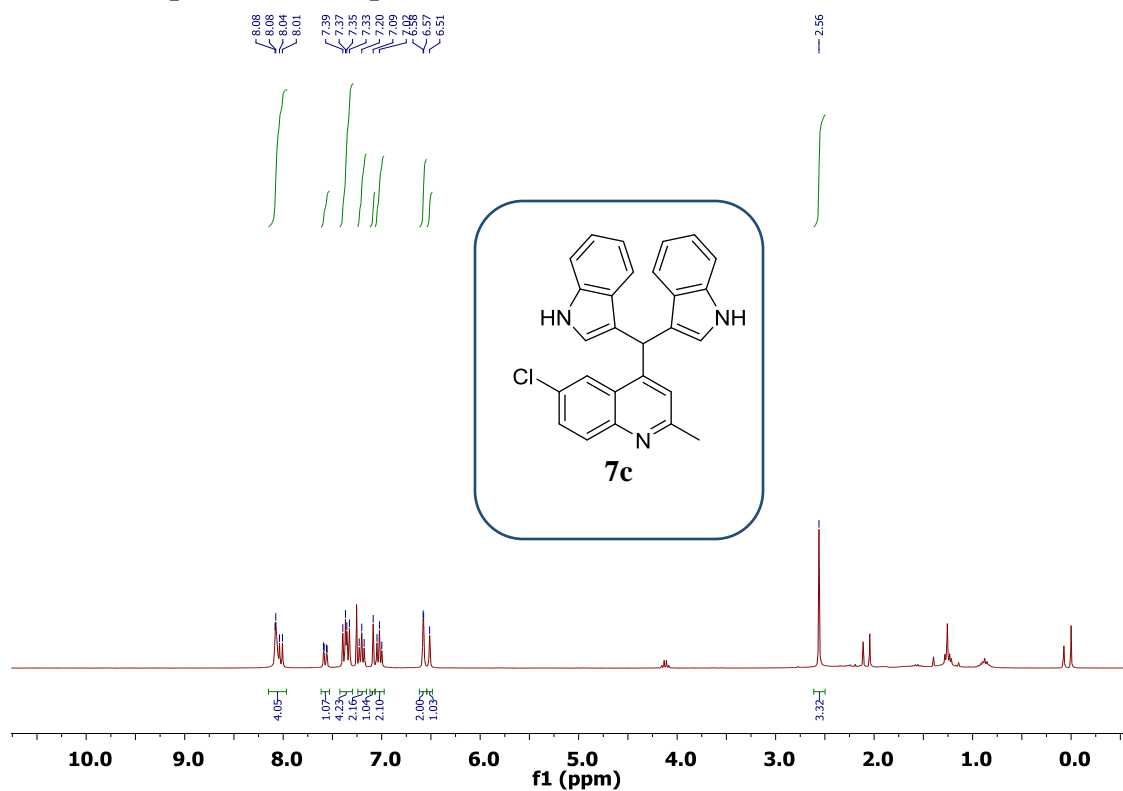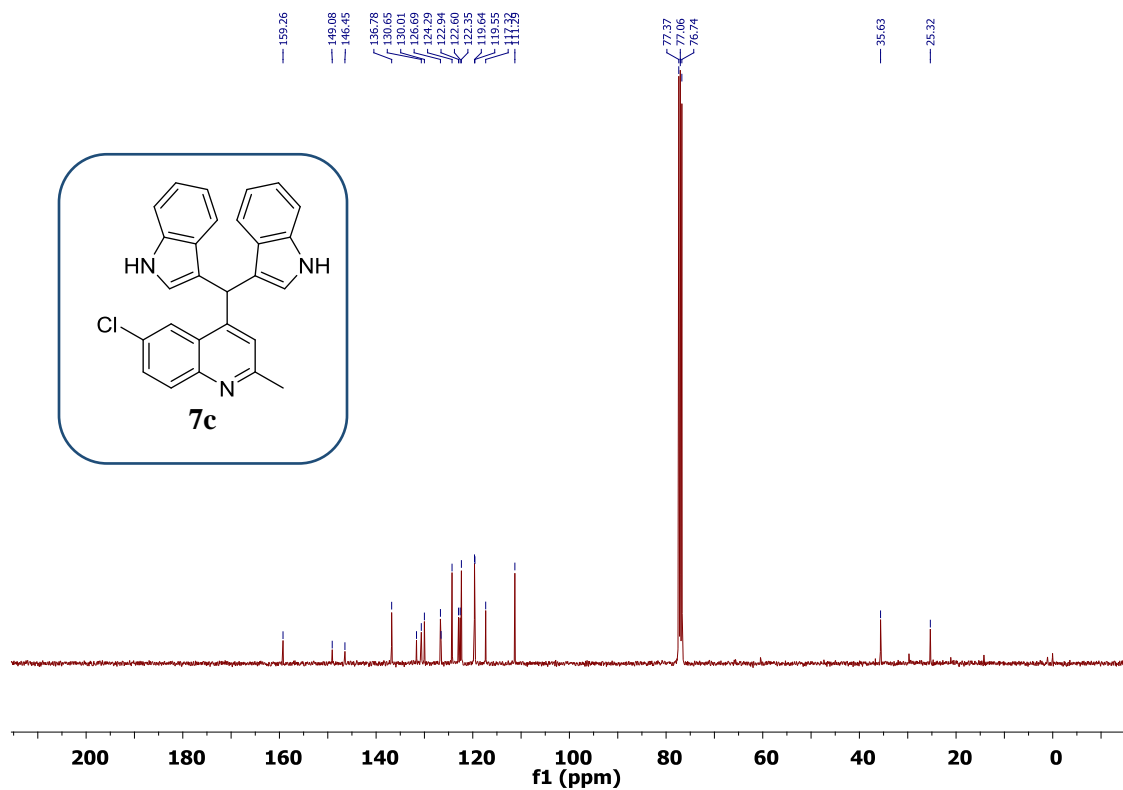

Supplement: d0ob02212h1.pdf [file d0ob02212h1.pdf]
